# Supplementary material for: The SIMS trial: adjustable anchored single-incision mini-slings versus standard tension-free midurethral slings in the surgical management of female stress urinary incontinence. A study protocol for a pragmatic, multicentre, non-inferiority randomised controlled trial
Source: PubMed Central journal article supplement — BMJ Open. 2017 Aug 11;7(8):e015111. doi: 10.1136/bmjopen-2016-015111 (PMC5724064; doi:10.1136/bmjopen-2016-015111), 2017-08-11
Supplement: bmjopen-2016-015111.draft_revisions.pdf [file bmjopen-2016-015111.draft_revisions.pdf]

# BMJ Open

## The SIMS Trial; Adjustable Anchored Single-Incision Mini-Slings Versus Standard Tension-Free Mid-Urethral Slings in the Surgical Management Of Female Stress Urinary Incontinence; A Study Protocol for A Pragmatic Multicentre Non-Inferiority Randomised Controlled Trial

|                                 |                                                                                                                                                                                                                                                                                                                                                                                                                                                                                                                                                                                                                            |
|---------------------------------|----------------------------------------------------------------------------------------------------------------------------------------------------------------------------------------------------------------------------------------------------------------------------------------------------------------------------------------------------------------------------------------------------------------------------------------------------------------------------------------------------------------------------------------------------------------------------------------------------------------------------|
| Journal:                        | <i>BMJ Open</i>                                                                                                                                                                                                                                                                                                                                                                                                                                                                                                                                                                                                            |
| Manuscript ID                   | bmjopen-2016-015111                                                                                                                                                                                                                                                                                                                                                                                                                                                                                                                                                                                                        |
| Article Type:                   | Protocol                                                                                                                                                                                                                                                                                                                                                                                                                                                                                                                                                                                                                   |
| Date Submitted by the Author:   | 08-Nov-2016                                                                                                                                                                                                                                                                                                                                                                                                                                                                                                                                                                                                                |
| Complete List of Authors:       | Abdel-fattah, Mohamed; University of Aberdeen, Obstetrics and Gynaecology<br>Maclennan, Graeme; University of Aberdeen, Health Services Research Unit<br>Kilonzo, M; University of Aberdeen<br>Assassa, R Phil ; Spire Hospitals<br>McCormack, Kirsty ; University of Aberdeen, CHaRT - Health Services Research Unit<br>Davidson, Tracey; CHaRT, HSRU, University of Aberdeen<br>McDonald, Alison; University of Aberdeen, Health Services Research Unit<br>NDow, James; University of Aberdeen, Surgery<br>Wardle, Judith; Patient Representative<br>Norrie, John; University of Aberdeen, Health Services Research Unit |
| <b>Primary Subject Heading</b>: | Obstetrics and gynaecology                                                                                                                                                                                                                                                                                                                                                                                                                                                                                                                                                                                                 |
| Secondary Subject Heading:      | Health services research, Health economics, Urology                                                                                                                                                                                                                                                                                                                                                                                                                                                                                                                                                                        |
| Keywords:                       | stress urinary Incontinence, TENSION-FREE VAGINAL TAPES, Single Incision Slings, Mid-urethral slings                                                                                                                                                                                                                                                                                                                                                                                                                                                                                                                       |
|                                 |                                                                                                                                                                                                                                                                                                                                                                                                                                                                                                                                                                                                                            |

SCHOLARONE™  
Manuscripts

1  
2  
3  
4  
5  
6  
7

## The SIMS Trial; Adjustable Anchored Single-Incision Mini-Slings Versus Standard Tension-Free Mid-Urethral Slings in the Surgical Management Of Female Stress Urinary Incontinence; A Study Protocol for A Pragmatic Multicentre Non-Inferiority Randomised Controlled Trial

8  
9  
10  
11

A UK Collaborative Study funded by the NIHR Evaluation, Health Technology Assessment (HTA) Programme - Funder Number 12/127/157

12  
13

### Authors:

14  
15

Mohamed Abdel-Fattah, MD, FRCOG♣

16  
17

Senior Clinical Lecturer/Consultant Urogynaecologist- University Of Aberdeen

18

Graeme MacLennan

19  
20

Senior Statistician, Health Services Research Unit (HSRU), University of Aberdeen

21

Mary Kilonzo

22  
23

Senior Health Economist, Health Economics Research Unit, University of Aberdeen

24

Mr R Phil Assassa, FRCOG.

25  
26

Consultant Gynaecologist, Spire Hospitals.

27

Kirsty McCormick

28  
29

Research Manager, Centre for Healthcare Randomised Trials (CHaRT), University of Aberdeen

30

Tracey Davidson

31  
32

Trial Manager, CHaRT, University of Aberdeen

33

Alison McDonald

34  
35

Senior Trial Manager, CHaRT, University of Aberdeen

36

James N'Dow, MD, FRCS.

37  
38

Chair in Surgery (Clinical), Academic Urology Unit, University of Aberdeen

39

Judith Wardle

40  
41

Patient Representative

42

John Norrie

43  
44  
45  
46

Professor of Clinical Trials, HSRU, University of Aberdeen

47

### ♣ Corresponding Author:

48

Dr. M. Abdel-Fattah,

49  
50

Senior Lecturer, Division of Applied Health Sciences, University of Aberdeen

51

Address: Second Floor, Aberdeen Maternity Hospital, Foresterhill, Aberdeen, AB25 2ZH, UK

52

Tel: 01224438424

53  
54  
55  
56  
57  
58  
59  
60

E-mail: [m.abdelfattah@abdn.ac.uk](mailto:m.abdelfattah@abdn.ac.uk)

**Abstract:****Introduction:**

Single incision mini-slings(SIMS) represent the 3<sup>rd</sup> generation of mid urethral slings(MUS). They have been developed with the aim of offering a true ambulatory procedure for treatment of female stress urinary incontinence(SUI) with reduced morbidity and earlier recovery while maintaining similar efficacy to Standard mid-urethral slings(SMUS). The aim of this study is to determine the clinical and cost- effectiveness of adjustable anchored SIMS compared to tension-free SMUS in the surgical management of female SUI, with 3-years follow-up.

**Methods and analysis:**

A pragmatic multicentre non-inferiority randomised controlled trial

**The primary outcome measure** is the patient-reported success rate measured by the Patient Global Impression of Improvement(PGI-I) at 12-months. The primary economic outcome will be incremental cost per QALY gained at 12-months.

**Secondary outcome measures include:** Adverse events; Objective success rates; Impact on other lower urinary tract symptoms; Health-related quality of life (QoL) profile and sexual function; and re-operation rates for SUI.. **Secondary economic outcomes include:** NHS and patient primary and secondary care resource use and costs; Incremental cost-effectiveness; and Incremental net benefit.

**The statistical analysis** of the primary outcome will be by intention-to-treat (ITT) and also a per protocol (PP) analysis. Results will be displayed as estimates and 95% confidence intervals. Confidence intervals around observed differences will then be compared to the pre-specified non-inferiority margin. Secondary outcomes will be analysed similarly.

**Ethics and dissemination:**

The North of Scotland Research Ethics Committee has approved this study(13/NS/0143).

The dissemination plans include HTA monograph; presentation at international scientific meetings; and publications in high-impact open access journals; the results will be included in the updates of NICE and EAU (European Association of Urology) guidelines; these two specific guidelines directly influence practice in the UK and worldwide specialists respectively. In-addition, plain English language summary of the main findings/results will be presented for relevant patient organisations.

**Registration details: ISRCTN93264234**

**Strengths and limitations of this study:****Strengths:**

- The study design as a multicentre randomised controlled trial; the gold standard study design to assess surgical interventions.
  - The pragmatic nature of the study (with few inclusion or exclusion criteria) ensures the generalisability of the results (i.e. the findings will be applicable to most women and most surgeons in the NHS).
  - The study protocol ensures surgeons' experience in both study arms prior to participation. This avoids the potential bias associated with limited surgical experience with relatively new surgical techniques.
  - Primary outcome is the patient-reported success rate obtained by a validated instrument. Patient-reported outcomes are recognised as the most relevant clinical trial outcomes in this field.
  - Outcomes are obtained by postal questionnaires; this eliminates the assessor bias.
  - An integrated health economic analysis is a major strength
  - The analysis plan for this non-inferiority design randomised trial includes both Intention to treat and per-protocol analysis
- Similar protocol was used in other similar trials worldwide allowing comparison of the results and relevant meta-analysis.

**Limitations:**

- The lack of an objective assessment post-intervention can be seen by some as a limitation.

CONFIDENTIAL Peer Review only  
Abdel-attah

## INTRODUCTION

### 1.1. Background

Urinary incontinence (UI) is a common and distressing condition for women particularly over the age of 40 years.<sup>1</sup> In the UK, it is estimated that 6 million (40%) of this age group have clinically significant UI symptoms, 1 million (6.2%) are bothered by symptoms and 0.33 million (2.2%) find them socially disabling.<sup>2</sup> UI has a negative impact on a woman's social, physical and psychological wellbeing; leading to embarrassment, low self-esteem and social isolation. UI is associated with negative effects on the productivity of working women, with some avoiding employment because of fear of embarrassing situations.<sup>3</sup> UI has significant cost implications to the individual and the health service. The total annual cost to the UK NHS for the management of women over the age of 40 with UI was £301 million or 0.3% of the NHS budget.<sup>4</sup> Costs borne by women in terms of out of pocket expenses were £230 million<sup>5</sup> or £290 per woman per year.<sup>6</sup> All values reported are inflated to 2009 values. It is therefore clear that UI in women is a major issue for the NHS and for society, with the number affected and cost of treatment posing a significant burden for healthcare both now, and in the future with an ageing population.

SUI is the most common type of UI in premenopausal women, accounting for almost 50% of cases.<sup>7</sup> It is defined as involuntary leakage of urine on effort, or exertion, or on sneezing or coughing. Initial management of SUI includes conservative therapy such as pelvic floor muscle training (PFMT), biofeedback, electrical stimulation or drugs. When conservative therapy fails, in about one third of cases, surgery is the next option.<sup>7</sup> Of the surgical treatments available, tension-free standard mid urethral slings (SMUS; RP-TVT & TO-TVT) are the most commonly performed procedures for SUI resulting in 11,000 finished consultant episodes in England in 2009-10, with estimated costs of £2,044/procedure<sup>8</sup> i.e. a total of £22.5 million/year. The Cochrane review of minimally invasive MUS<sup>9</sup> concluded that there was no evidence of significant differences in patient-reported outcomes between RP-TVT & TO-TVT and therefore the control arm for the proposed RCT is a pragmatic combination of these 2 types of SMUS. Analysis of BSUG database showed that the vast majority of SMUS in UK are done under GA or deep intra-venous patient sedation.<sup>10</sup>

SIMS represent the 3<sup>rd</sup> generation of mid urethral slings (MUS); they have been developed with the aim to offer a true ambulatory procedure for treatment of SUI with reduced morbidity, earlier recovery while maintaining similar efficacy to SMUS. NICE undertook an Interventional Procedure overview of SIMS<sup>1</sup> for the management of SUI in women in July 2007 (NICE guidance/ IP398): there was no RCT evidence and only small case series data were available. The report concluded that the current evidence on the safety and efficacy of SIMS was inadequate in quality and quantity, and recommended that SIMS should only be performed in the context of research. Similarly, the Cochrane review of minimally invasive MUS found no randomised evidence evaluating SIMS.<sup>9</sup>

### 1.2. Rationale for the study

The European guidelines<sup>11</sup> on the management of urinary incontinence describe two concepts of MUS for the surgical treatment of SUI in women: (1) Tension-free MUS that include all MUS that depend on their post-insertion fixation mechanism on friction to nearby tissues within their relatively long trajectory of insertion such as SMUS (both RP-TVT and TO-TVT); one type of non-anchored SIMS (Contasure-Needleless) also fits into this group. (2) Anchored MUS that include all other SIMS and other anchored slings such as Remeex TRT; the latter is mainly used in women with recurrent SUI.<sup>12,13</sup> SIMS fundamentally differs from SMUS because they have a shorter trajectory of insertion and therefore need a robust anchoring mechanism to the obturator complex with a strong post-insertion pull-out force. All currently available SIMS share the same tape material (type 1 polypropylene) and the insertion technique through a single vaginal incision; however, they differ in the type/robustness of the anchorage mechanism used.<sup>14,15</sup> A number of recently developed

1 SIMS, such as Ajust, Altis, and TFS, have an added advantage that allow post-anchorage  
2 adjustment of the sling tension and have been shown in independent animal studies,  
3 assessing their immediate and delayed extraction forces, to be associated with the  
4 strongest and most robust anchoring mechanism to the obturator complex.<sup>14,15</sup>

5  
6 A multicentre prospective cohort study of adjustable anchored SIMS- Ajust<sup>®</sup> in 100 women  
7 has shown its acceptability (75%) and feasibility (97%) to be done under local anaesthesia  
8 (LA).<sup>16</sup> We recently concluded our multicentre prospective pilot RCT<sup>17</sup> where 137 women  
9 were randomised to adjustable anchored SIMS-Ajust<sup>®</sup> (n=69), performed under LA, vs.  
10 SMUS (TVT- O<sup>TM</sup>; n=68). At a minimum of 12 months follow-up (FU); there were no  
11 significant differences in the patient-reported success rate (OR 0.895; 95% CI 0.344,  
12 2.330; p= 1.000), objectives success rate (OR 0.929; 95%CI 0.382, 2.258; p=1.00) and  
13 re-operation rates (OR 0.591; 95% CI 0.136, 2.576; p=0.721) between both groups.  
14 Comparable number of women reported significant improvement in their QOL (quality of  
15 life) (p=0.190) and sexual function (p=0.699) in both groups. Similar results were  
16 recently reached by a Deutsch group in similar small RCT, Similarly, a number of  
17 observational studies assessing adjustable anchored SIMS, from various countries (UK,  
18 France, Italy, USA and Israel), with varying cohort sizes, and length of FU (6-12 month)  
19 have shown similar patient-reported and objective success rates of 85% - 91%.<sup>18-21</sup>

20  
21 A recent updated systematic review and meta-analysis<sup>22</sup> comparing the effectiveness and  
22 complications of SIMS versus SMUS for the surgical management of female SUI; included  
23 a total of 26 RCTs (n = 3308 women). The results showed that, after excluding RCTs  
24 evaluating TVT-Secur which was clinically irrelevant having been excluded from clinical  
25 practice, that there was no evidence of significant differences between SIMS and SMUS in  
26 patient-reported cure rates (risk ratio [RR]: 0.94; 95% confidence interval [CI], 0.88–1.00)  
27 and objective cure rates (RR: 0.98; 95% CI, 0.94–1.01) at a mean follow-up of 18.6  
28 months. These results pertained on comparing SIMS versus TO-TVT and RP-TVT  
29 separately. SIMS had significantly lower postoperative pain scores (weighted means  
30 difference [WMD]: -2.94; 95% CI, -4.16 to -1.73) and earlier return to normal activities and  
31 to work (WMD: -5.08; 95% CI, -9.59 to -0.56 and WMD: -7.20; 95% CI, -12.43 to -1.98,  
32 respectively). SIMS had a non-significant trend towards higher rates of repeat continence  
33 surgery (RR: 2.00; 95% CI, 0.93–4.31). The authors performed an exploratory subgroup  
34 analysis of four RCTs evaluating adjustable anchored SIMS (Ajust and TFS) versus TO-  
35 TVT and found no evidence of significant differences in patient- reported or objective cure  
36 rates. However, it is important to note that they found no RCTs evaluating Altis.<sup>22</sup> The  
37 authors concluded that on excluding TVT-Secur, there was no evidence of significant  
38 differences in patient-reported and objective cure between currently used SIMS and SMUS  
39 at midterm follow-up while associated with more favourable recovery time. The authors  
40 urged caution in interpretation of results due to the heterogeneity of the small trials  
41 included, lack of blinding of the assessors which can be source of bias, level of incomplete  
42 data leading to attrition bias, and the relatively short term of follow-up.

43  
44 Evidence of longer term outcomes for adjustable anchored SIMS are now emerging. In  
45 July 2012, Sivaslioglu et al,<sup>23</sup> reported the 5-year follow up for their RCT (n=80)  
46 comparing adjustable anchored SIMS-TFS<sup>®</sup> vs. SMUS. The results showed objective and  
47 patient-reported success rates of 83% & 89% in the SIMS-TFS<sup>®</sup> group compared to  
48 75% & 78% in the SMUS group; the difference was not statistically significant (p=0.16).  
49 Most recently, Naumann et al<sup>24</sup> reported their prospective observational study of 51  
50 women who underwent SIMS-Ajust<sup>®</sup> with 20-29 month follow- up; the patient-reported  
51 success rate was 86%.

52  
53  
54 The cost-effectiveness of any new technology is a pre-requisite for its adoption in clinical  
55 practice and therefore we have conducted the first health economic analysis of adjustable  
56 anchored SIMS - Ajust<sup>®</sup> versus SMUS-TVT-O<sup>TM</sup> <sup>25</sup> which was performed alongside our  
57 pilot RCT (n=137).<sup>17</sup> The health economic outcome measures were incremental costs to  
58  
59  
60

1 the health services, patient QALYs and incremental cost per QALY. Results have shown  
2 an incremental total cost savings to the health service of £142/procedure with adjustable  
3 anchored SIMS, not counting the further potential economic gain of earlier return to work  
4 in these women. There were no significant differences in QALYs generated compared to  
5 SMUS; 95%CI -0.008 to 0.002. Assuming these results were generalisable to all  
6 currently performed MUS procedures in England and Wales (approximately 11,000 in  
7 2010),<sup>10</sup> our analyses suggest the potential for substantial cost savings to the NHS in the  
8 UK of about £1.5 million per year. However, these results have to be confirmed in the  
9 definitive RCT.

10  
11 The above evidence has led to a consensus amongst urologists and urogynaecologists that  
12 an adequately powered RCT with clinical effectiveness as the primary end point is now  
13 timely and required to inform surgeons, patients and decision makers with the most  
14 clinically-effective, cost-effective surgical treatment for primary SUI, that is associated with  
15 the least burden on patients QoL and NHS resources.

### 16 17 18 **1.3 STUDY OBJECTIVES**

19 The aim of this pragmatic multicentre RCT is to determine the clinical effectiveness and  
20 cost-effectiveness of adjustable anchored Single Incision Mini-Slings (SIMS) compared  
21 to tension-free Standard Mid-urethral Slings (SMUS) in the surgical management of female  
22 stress urinary incontinence (SUI).

23  
24 The hypothesis being tested is that patient-reported success rate following surgical  
25 treatment with adjustable anchored SIMS procedures is non-inferior to tension-free SMUS  
26 while the former is associated with less post-operative pain, shorter hospital stay,  
27 earlier recovery and consequently earlier return to usual activities/ work and is more cost-  
28 effective than SMUS.

29  
30 The primary objective is to compare SUI outcomes in terms of patient-reported success  
31 rates as measured by the PGI-I at 12 months.

32  
33 The primary economic objective is to compare cost-effectiveness measured in terms of  
34 quality adjusted life years (QALYs) derived from responses to the EQ-5D and the ICIQ-  
35 LUTS qol) over the follow up period.

36  
37 The secondary objectives are to compare objective success rates (24 hour pad test/ home  
38 cough stress test), other patient-reported outcomes including: postoperative pain scores  
39 and health related QoL using the ICIQ-LUTSqol, impact on other urinary symptoms (ICIQ-  
40 FLUTS), impact on sexual function (ICIQ-FLUT- Sex/ PISQ-IR), complication rates,  
41 disease recurrence and costs to the NHS and patients.  
42  
43  
44  
45  
46  
47  
48  
49  
50  
51  
52  
53  
54  
55  
56  
57  
58  
59  
60

## 2. Methods:

### 2.1. Study Design

A pragmatic multicentre non-inferiority randomised controlled trial comparing adjustable anchored single-incision mini-slings (SIMS) with tension-free standard mid-urethral slings (SMUS) in surgical management of stress urinary incontinence (SUI) in women. The trial structure is presented below (Figure 1).

Figure 1 Flow diagram

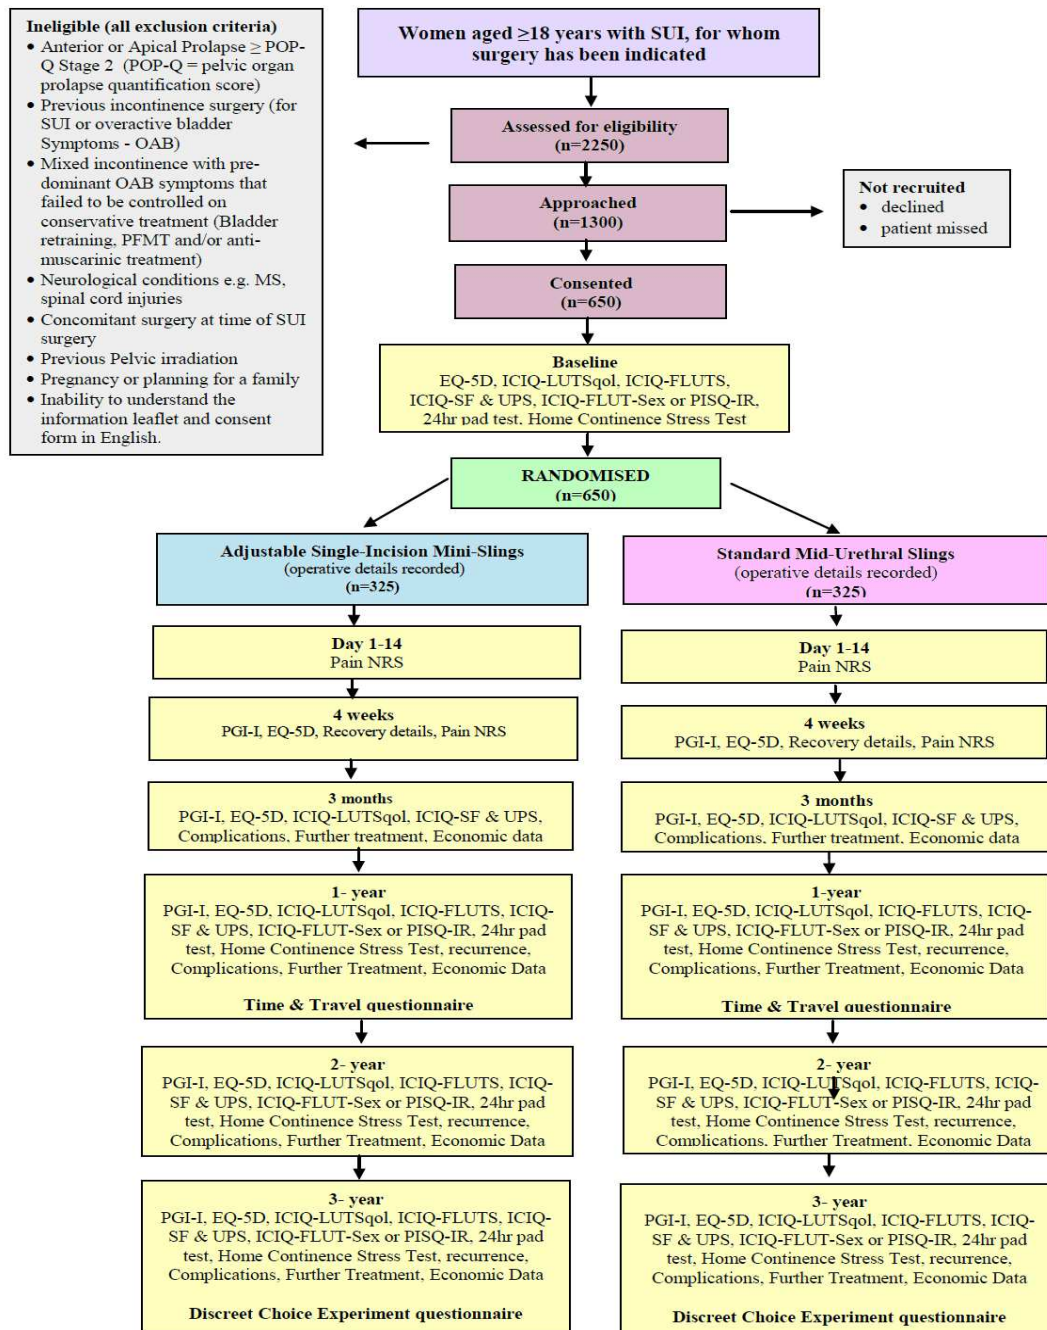



## 2.2. Intervention to be evaluated

The interventions being compared are: 1) tension-free standard mid-urethral slings (SMUS) including RP-TVT & TO-TVT and 2) adjustable anchored single-incision mini-slings (SIMS) which fulfil the following criteria of robust anchorage and post-insertion adjustability:

- SIMS is made of Type I polypropylene Mesh: mono-filament & macro-porous (pore size =75 µm);
- Robustly anchored to Obturator Complex (Robust insertion is defined as: Immediate pull-out force = 12 Newtons (N) and/ or four weeks pull out force = 30N);
- Fully adjustable sling post insertion
- Proven feasibility to be done under local anaesthetic (LA);
- Minimum of level 2 evidence showing their safety and short term (minimum 3-month) patient reported outcomes.

SMUS will be performed under general anaesthetic (GA) or deep intravenous sedation while adjustable anchored SIMS will be done under local anaesthetic (LA) as an opt-out policy (i.e. LA will be the standard type of anaesthesia for adjustable anchored SIMS unless specifically declined by a participant requesting GA). Furthermore, participant's requests for conversion to GA will be respected at any stage of the procedure. A standard LA protocol, which we have previously published and successfully used in two previous studies<sup>16,17</sup> will be used as a guidance (Appendix 1).

All participants, in both arms, will receive pre-operative analgesia (30-60 minutes prior to the operation): Paracetamol and Non-steroidal anti-inflammatory drug NSAID (Diclofenac Sodium or Ibuprofen); a vaginal application of EMLA cream (a 5% emulsion preparation, containing 2.5% each of lidocaine/prilocaine) and optional 10ml of intra-urethral Instillagel (anaesthetic, antiseptic lubricant). All participants would receive preoperative/ intra-operative prophylactic broad spectrum antibiotics. A cystoscopy (rigid or flexible) will be performed in all women following insertion of the sling, regardless of the study arm. It is worth noting that rigid cystoscopy was well tolerated by all women under LA in the pilot RCT. No vaginal packs or catheters would be routinely inserted. Postoperatively all participants will undergo voiding assessment including assessment for post-voiding residual urine volume (PVR) using a bedside bladder-scanner (Appendix 2, guidance protocol & flowchart for postoperative voiding assessment).

### 2.1.1 Adjustable anchored single-incision mini-slings (SIMS)

A standard combination of fast and delayed action LA (dose dependant on participant's body weight) will be infiltrated vaginally into either side of the urethra, the vaginal angles (sulci) and behind the inferior pubic ramus into the obturator complex (e.g. using a curved black spinal needle and/or pudendal block needle). Women will be accompanied by a nurse for support. All participating surgeons will use an adjustable anchored SIMS that meet the pre-specified criteria described below. A standardised insertion technique will be used by all surgeons following the original description of the particular SIMS used. Most adjustable anchored SIMS, however, have a fairly similar procedure of insertion. We describe below the standard insertion steps for the adjustable anchored SIMS (Ajust<sup>®</sup>-CR Bard and Altis<sup>®</sup>-Coloplast): women will be positioned in Lithotomy position with hips flexed at 90-100 degree. LA infiltration as above; a sub-urethral vertical vaginal incision (~1.5 cm) will be made; bilateral para-urethral tunnels created reaching to the posterior margin of the inferior pubic ramus but without piercing the obturator membrane. Further infiltration of LA into the obturator membrane; SIMS, with the 'fixed anchor' end mounted on the applicator, would be introduced through the pre-dissected para-urethral tunnel until reaching behind the inferior pubic ramus. The applicator would then pivot slowly behind the ramus and through the obturator complex allowing the fixed anchor to maintain its position in the obturator membrane and muscles at points equivalent to 10 & 2 O'clock in relation to the

1 urethral orifice. The insertion steps would be repeated on to the other side allowing the  
2 'adjustable anchor' to be fixed in the contra-lateral obturator complex. The SIMS is now  
3 robustly anchored and the tension would then be adjusted as required to achieve  
4 continence whilst avoiding voiding difficulty. Performing the cough stress test can prove  
5 very helpful in this adjustment process and is recommended. The adjustable anchor  
6 would then be locked in case of the Adjust (not required with Altis), a cystoscopy will be  
7 performed to exclude perforation and the vaginal incision closed.

### 9 **2.1.2 Standard tension-free mid-urethral slings (SMUS):**

10 The choice of SMUS whether retropubic or transobturator will depend on surgeons'  
11 experience. We expect a 50% representation of each type of SMUS in the control arm.

### 14 **2.1.3 Retropubic Tension Free Vaginal Tape (RP-TVT):**

15 RP-TVT will be Type-1 polypropylene Mesh (mono-filament and macro-porous - pore size  
16  $\geq 75$   $\mu\text{m}$ ). The Tension Free Vaginal Tape (TVT<sup>®</sup>) procedure was developed by Ulmsten  
17 and Petros.<sup>26</sup> The procedure will be done under GA or intravenous sedation as per the  
18 standard practice of each surgeon. The bladder will be emptied with a Foley catheter.  
19 Close to the superior rim of the pubic bone, two 1-cm long transverse incisions 3cm either  
20 side of the midline will be made after injection of LA into the abdominal skin just above the  
21 symphysis pubis, down along the back of the pubic bone to the retropubic space and  
22 vaginally into the peri-urethral area. An incision ~1.5 cm long will be made in the midline of  
23 the suburethral vaginal wall; followed by dissection of the peri-urethral tunnels to allow  
24 introduction of the TVT<sup>®</sup> needle. A stent will be inserted into the Foley catheter to deviate  
25 the urethra-vesical junction away from the path of the needle. The TVT<sup>®</sup> needle perforates  
26 the urogenital diaphragm and will be brought up to the abdominal incision 'shaving' the  
27 back of the pubic bone. The procedure will then be repeated on the other side, and a  
28 cystoscopy will be performed to exclude perforation. The cough stress test may then be  
29 performed, according to surgeon's standard technique, and the sling adjusted in a tension-  
30 free fashion and the incisions are closed.

### 33 **2.1.4 Transobturator Tension Free Vaginal Tape (TO-TVT):**

34 TO-TVT will be Type-1 polypropylene Mesh (mono-filament and macro-porous - pore size  
35  $\geq 75$   $\mu\text{m}$ ). All procedures will be performed under GA as originally described by Delrome<sup>72</sup>  
36 and de-Leval<sup>28</sup> for the outside-in and inside-out routes respectively. Women are  
37 positioned in Lithotomy position with hips flexed at 100-110 degrees and LA may be  
38 infiltrated into the vaginal angles; the latter is not a standard practice however is  
39 recommended in a similar regime to the one used in the adjustable SIMS insertion  
40 (above). ~1.5 cm sub-urethral longitudinal vaginal incision will be made and bilateral para-  
41 urethral tunnels created reaching to the posterior margin of the inferior pubic ramus.  
42 Bilateral groin incisions are made 1-2cm lateral to the labio-femoral fold and 2 cm above  
43 level of urethra. The transobturator trocar is inserted from groin incisions at 90  
44 degree to pierce the obturator muscles and membranes and then guided by the  
45 surgeon's finger to the vaginal incision. TO-TVT is then mounted on the trocar and the  
46 trocar is withdrawn in reverse order. The previous 2 steps are repeated on the contra-  
47 lateral side achieving TO-TVT sub-urethral placement and the TO-TVT is then adjusted  
48 tension-free. For the inside-out technique of insertion, TO-TVT would be introduced in the  
49 reverse route from the vaginal incision towards the groin using the winged guide to protect  
50 the lower urinary tract (LUT). A cystoscopy will be performed to exclude LUT injury.  
51 Vaginal and skin incisions will then be closed.

## 53 **2.3. Study population**

54 Women aged 18 years or over with SUI who have been referred to the collaborating  
55 surgical gynaecology, urology and urogynaecology units from across the UK for treatment  
56 of SUI for whom surgery has been indicated.

1 Setting: Secondary and tertiary care acute hospital settings across the UK. NHS Grampian  
2 will be the clinical co-ordinating centre and house the Chief Investigator (CI).  
3

4 Each unit will have at least one participating surgeon who is competent in performing  
5 SIMS under LA prior to enrolling in the RCT. Ideally, the surgeon will have performed 20  
6 adjustable anchored SIMS procedures (with 10 performed under LA); within prospective  
7 audit and results submitted to a national surgical database. The CI, or a delegated expert in  
8 SIMS, will provide training in SIMS under LA for enrolling surgeons as necessary and will  
9 ensure adequate expertise of surgeons in both arms. Surgeons will be experienced in at  
10 least one type of SMUS (RP-TVT or TO-TVT) and will have performed an adequate  
11 workload in the preceding 2 years.  
12

### 13 **2.3.1. Selection of participants**

14 As standard practice, clinicians will assess patients likely to require surgery for SUI. A log  
15 will be taken of all potentially eligible patients assessed in order to document the reasons  
16 for non-inclusion in the study (e.g. reason they were ineligible, or declined to participate) to  
17 inform the CONSORT diagram.  
18

19  
20 Brief details of potentially eligible patients will be recorded in the screening logs at each site  
21 (these will be an aid to monitoring potential participant inclusion).  
22

### 23 **2.3.2. Planned inclusion and exclusion criteria**

#### 24 **Inclusion criteria:**

25 Women aged 18 years or over with SUI, who have been referred to one of the collaborating  
26 units from across the UK, and for whom surgery has been indicated. Women will have  
27 completed their families, failed or declined conservative treatment (supervised pelvic floor  
28 muscle training - PFMT). All women will have urodynamic stress incontinence, or  
29 urodynamic mixed urinary incontinence with predominant SUI bothering symptoms. The  
30 small group of women with pure symptoms & signs of SUI **and** no symptoms of overactive  
31 bladder (OAB) or voiding dysfunction (VD) can be included without urodynamic  
32 investigations as per the updated NICE guidelines.  
33

34 Pre-operative urodynamic investigations include: free uroflowmetry, post-voiding residual  
35 urine volume assessment and subtracted filling cystometry. Other tests such as Urethral  
36 pressure profile and Leak point pressure pressures are not mandatory however are  
37 welcome as they will inform a number of the pre-planned secondary outcomes.  
38

#### 39 **Exclusion criteria:**

40 Women will be excluded if they have one or more of the following:

- 41 • Anterior or Apical Prolapse  $\geq$  POP-Q Stage 2 (POP-Q = pelvic organ prolapse  
42 quantification score)
  - 43 • Previous incontinence surgery (for SUI)
  - 44 • Mixed incontinence with pre-dominant OAB symptoms (defined as OAB failed to be  
45 controlled on conservative treatment such as Bladder retraining, PFMT and/or anti-  
46 muscarinic treatment)
  - 47 • Neurological conditions e.g. MS, spinal cord injuries.
  - 48 • Concomitant surgery at time of SUI surgery.
  - 49 • Previous Pelvic irradiation
  - 50 • Pregnancy or planning for a family.
  - 51 • Inability to understand the information leaflet and consent form in English
- 52  
53

## 54 **2.4. Recruitment and Study Procedures**

### 55 **2.4.1. Identifying participants**

56  
57  
58  
59  
60

1 Local procedures at the participating hospitals are different and the timing and mode of  
2 approach to patients and the consent process will vary to accommodate both the variability  
3 at the sites and the needs of the patients. Where possible, the Patient Information Sheet  
4 will be sent to patients together with their clinic appointments ensuring that they have  
5 ample time (>24 hours) for consideration before being approached by the research team at  
6 the clinic.

7  
8 Patients likely to require surgery for SUI and who meet the eligibility criteria will be  
9 identified at the pre-assessment clinics, urodynamic clinics and outpatient urology/  
10 gynaecology clinics by the consultant, research nurse (RN) or a designated team member.  
11 The consultant/ research nurse (RN) will introduce the study to the patient and provide her  
12 with the Patient Information Sheet as appropriate; answer any queries and if appropriate  
13 the participant may sign the consent form; receive the baseline assessment pack for  
14 completion at home and bring back on the day of surgery or send back to the site using  
15 pre-paid post.

16  
17 Patients whose first approach is at the clinic will be given as much time as they require to  
18 consider participation; patients may make a decision to participate at this time or may agree  
19 to be contacted at home by the local RN. If a patient agrees to be contacted at home she  
20 will receive a telephone call from the local RN to discuss any queries. If a patient agrees to  
21 the study at that stage, then arrangements will be made for baseline assessment and  
22 consenting; this could be done as a separate appointment or at a pre-admission clinic. As  
23 above, participants can complete the baseline assessment pack at home and bring back on  
24 the day of surgery or send back to the site using pre-paid post. These arrangements can be  
25 individualised for each centre.

#### 26 27 **2.4.2. Informed consent**

28 The patient information leaflet explains that the trial is investigating the use of either  
29 adjustable single-incision mini-slings (SIMS) or standard tension-free mid-urethral slings  
30 (SMUS) for the surgical management of stress urinary incontinence (SUI) in women.  
31 Signed informed consent forms will be obtained from the participants in all centres.  
32 Participants who cannot give informed consent (e.g. due to incapacity) will be not be  
33 eligible for participation. The participant's permission will be sought to inform their  
34 general practitioner that they are taking part in this trial.

#### 35 36 **2.4.3. Randomisation and allocation**

37 Eligible and consenting participants will be randomised to one of the two study groups in a  
38 1:1 allocation ratio using the randomisation application at the trial office at CHaRT. This  
39 randomisation application will be available 24 hours a day, 7 days a week as both an  
40 Interactive Voice Response (IVR) telephone system and as an internet based application.  
41 The randomisation will use a minimisation algorithm based on centre and previous  
42 supervised Pelvic Floor Muscle Training within the last two years [PFMT: Yes/No]. Women  
43 will be further randomised to receive short versus detailed sexual function questionnaire.

#### 44 45 **2.4.4. Follow-up procedures**

46 Eligible patients that have given signed informed consent to participate in the study will be  
47 randomised to either SIMS or SMUS. They will be asked, at baseline, to complete the pre-  
48 operative questionnaire pack which includes few questions on participants' demographic  
49 details and pre-operative health/ medications. It also includes validated questionnaires for  
50 symptom severity of UI and its impact on quality of life (QoL) and sexual function: the EQ-  
51 5D; ICIQ-SF; Urgency perception scale (UPS); ICIQ-LUTSqol; ICIQ-FLUTS; ICIQ-  
52 FLUTSsex (or PISQ-IR); and to perform 24-hours pad test and home continence stress test  
53 (see Appendix 3 Objective Assessment of Urinary Incontinence Within the SIMS Trial -  
54 Protocol).

55  
56  
57 At day 1 to day 14 they will be asked to complete the pain score and use of analgesics  
58 questions by self-completed post-operative diary. At 4 weeks post-operative participants

1 will be asked to complete a short questionnaire (on the last section of the diary) to capture  
2 pain, use of analgesia, complications, return to work/ normal activities, PGI-I and EQ-5D.  
3 At 3 months post-operative, participants will be asked to complete a number of  
4 questionnaires: to measure the PGI-I; EQ-5D; ICIQ-SF; UPS; questions related to health  
5 services resource; and to report any complications or further treatment received for UI. In  
6 addition, at 12, 24 and 36 months post-randomisation, participants will be asked to  
7 complete a questionnaire to measure the PGI-I, recurrence, further treatment received and  
8 questions related to health services resource use, in-addition to all baseline assessment  
9 pack. Taking into account the inevitable waiting time between randomisation and receiving  
10 the surgical treatment (average surgical waiting list is 8-12weeks) and in-addition the  
11 clinical importance of assessing the outcomes at 12 month postoperative, we aim to send  
12 the 1 year follow-up pack at 15 month post-randomisation. This strategy will ensure that the  
13 vast majority of participants are at least 12 month post-operative at time of capturing the  
14 primary outcome. In-addition, at 20 months participants will be asked to fill out an additional  
15 economic data questionnaire, which will include the patient time and travel costs  
16 questionnaire. Sending this questionnaire at 20 months will minimise patient burden when  
17 completing the annual questionnaire. The discrete choice experiment (DCE) will be  
18 completed at the end of the 3 year follow-up period.

19  
20 Questionnaires and up to two reminders will be sent to participants by post. Non-  
21 responders to the 12m post-randomisation questionnaire will be contacted by phone for a  
22 short interview to capture the primary outcome (PGI-I; a single item question to mark the  
23 outcome of the operation as described in section 5.1). If the participant indicates at this  
24 phone call her wish to withdraw from the study a "Change of Status Form" will be completed  
25 as below. Participants will be sent a voucher (of modest value) as a token of appreciation  
26 for completion and return of the 3 month and follow-up questionnaires.

#### 27 28 **2.4.5. Change of Status/Withdrawal procedures**

29 Participants will remain on the trial unless they choose to withdraw consent or if they are  
30 unable to continue for a clinical reason. If a participant withdraws consent, participant  
31 questionnaires will not be collected. A member of the research team will contact the  
32 participant by phone and complete the "change of status form" which includes the  
33 participant's instructions on what parts, or whole, of the study they may wish to withdraw  
34 from. Unless a participant specifically declines the research team will continue to collect  
35 relevant data from their health care records such as ONS and NHS central registries. All  
36 other changes in status with the exception of formal withdrawal of consent will mean the  
37 participant is still followed up for all study outcomes wherever possible.

#### 38 39 **2.4.6. Subsequent arrangements (if applicable)** 40 **Informing key people**

41 Following formal trial entry:

42 The Study Office will:

- 43 i) Inform the participant's General Practitioner (by letter enclosing information about  
44 SIMS and Study Office contact details).

45 The local Research Nurse will:

- 46 i) File the Hospital Copy of the Consent form in the hospital notes along with  
47 information about SIMS; give one copy to the patient; file one copy to the local  
48 site file and send one copy to the Study Office in Aberdeen.
  - 49 ii) Use the SIMS internet database to enter data regarding the participant, including  
50 data required to complete randomisation
  - 51 iii) Data entry onto the study database as soon as practical.
  - 52 iv) Forward a copy of study documentation when and as requested by the Study  
53 Office in Aberdeen to facilitate quality control.
- 54  
55  
56  
57  
58  
59  
60

### Notification of/by GPs

GPs are asked to contact the Study Office if one of the participants moves, becomes too ill to continue or dies, or any other notifiable event or possible serious adverse event occurs. Alternatively, staff at the Study Office may contact the GP.

## 2.5. SAFETY

The SIMS trial involves procedures for the surgical management of SUI in women which are well established in clinical practice. Adverse effects may occur during or after any type of surgery.

### 2.5.1. Definitions

An **adverse event** (AE) is any untoward medical event affecting a clinical trial participant. Each initial AE will be considered for severity, causality or expectedness and may be reclassified as a serious event.

Adverse events are not:

- Continuous and persistent disease or symptom, present before the trial, which fails to improve; such as urgency, urgency incontinence, voiding dysfunction, pain or dyspareunia
- Treatment failure: persistence or recurrence of urinary incontinence.

Worsening pain or where the site of pain changes is an adverse event.

A **serious adverse event** (SAE) is any AE, that:

- results in death;
- is life threatening (i.e. the participant was at risk of death at the time of the event; it does not refer to an event which hypothetically might have caused death if it was more severe);
- results in persistent or significant disability or incapacity;
- requires an un-planned re-admission to the hospital (defined as "participant admitted as an in-patient with  $\geq 1$  night hospital stay"). This excludes hospital ward attenders for minor issues such as lower UTI, voiding difficulties or other issues considered by the PI to be minor. This information will be routinely collected on the postoperative form and/ or the Supplementary hospital visit form as appropriate.
- requires prolongation of existing hospitalisation (defined as >36 hours postoperative hospital stay). This excludes prolongation of hospital stay for minor issues such as voiding difficulties; such information will be routinely collected on the Operation and clinical data form. Prolongation of hospital stay due to social/ geographical reasons will not be considered.
- Is otherwise considered medically significant by the investigator

*Note: Hospitalisations for treatment planned prior to randomisation and hospitalisation for elective treatment of a pre-existing condition, or complication arising from either, will not be considered as an (S)AE.*

### Specific expected adverse events:

In this surgical trial the following events are potentially expected:

Intra-operative complications: Bleeding, bladder/urethral injury, bowel injury, nerve injury (obturator/ dorsal nerve of clitoris), injury to blood vessels, hypersensitivity to the local/

1 general anaesthetics and/ or any of the medications or materials used; pain; shaking/  
2 dizziness, change of procedure or device and / or type of anaesthesia.

3 **Immediate Postoperative complications:** Pain in the hip/ thigh/ or the vagina, Infection  
4 (chest, urinary tract), bleeding, fever, haematuria, syncope, dizziness, voiding difficulties/  
5 urinary retention and thromboembolism.

6 **Later Postoperative complications:** Pain in the hip/ thigh/ or the vagina, mesh extrusion,  
7 mesh erosion to the vagina or lower urinary tract, haematoma, abscess formation and  
8 nerve injury. In-addition, new onset or worsening of any of the following: dyspareunia,  
9 vaginal discharge, voiding difficulties/ urinary retention, long-term self-catheterisation,  
10 urgency/ urgency incontinence.

## 13 **2.5.2 Procedures for detecting, recording, evaluating & reporting AEs, SAEs**

### 14 **2.5.2.1 Detecting AEs and SAEs**

15 All AEs and SAEs must be recorded from the time a participant consents to join the study  
16 until follow-up is complete.

17 Follow-up questionnaires will enquire about any AE/SAE occurrence; in-addition,  
18 participants will also be asked if they have been admitted to hospital and/or seen a  
19 healthcare professional.

### 22 **2.5.3 Recording AEs and SAEs**

23 Depending on severity, when an AE/SAE occurs, it is the responsibility of the Investigator  
24 (or delegated medical personnel) to review appropriate documentation (e.g. hospital notes,  
25 laboratory and diagnostic reports) related to the event. The Investigator (or the delegated  
26 medical personnel) should then record all relevant information in the CRF and if required on  
27 the SAE form.

28 Information on SAE to be collected includes type and date of event, Investigator  
29 assessment of severity and causality and any investigation/ treatment required.

30 Planned hospital visits for conditions other than those associated with urinary incontinence  
31 and/ or its treatment will not be collected or reported. Further UI treatment will be recorded  
32 as a secondary outcome measure, but will not be reported as serious adverse events.

### 33 **2.5.4 Evaluating AEs and SAEs**

34 All adverse events will be assessed in respect of seriousness, relationship to study  
35 intervention, whether expected or unexpected, and therefore, whether constituting a  
36 Serious Adverse Event (SAE) by the local PI, CI or their deputies.

#### 37 **Assessment of Seriousness**

38 The Investigator should make an assessment of seriousness as defined in Section 4.1.

#### 39 **Assessment of Causality**

40 The Investigator must make an assessment of whether the AE/SAE is likely to be related to  
41 any of the research procedures according to the following definitions:

- 42 - **Related:** resulted from any of the procedures required by the protocol, whether or  
43 not this procedure is the specific intervention under investigation and whether or not  
44 it would have been administered outside the study as normal care.
- 45 - **Unrelated:** where an event is not considered to be related to any of the research  
46 procedures.

### **Assessment of Severity**

The Investigator should make an assessment of severity for each AE/SAE and complete a SAE form should any of the SAE criteria in 4.1 be met.

### **Assessment of Expectedness**

When assessing expectedness refer to the expected events (Section 4.1)

An example for the assessment of an AE; Intra-operative bleeding will be collected as an AE on the operative form, however if >500mls a SAE form will be completed.

### **2.5.5 Reporting AEs and SAEs**

#### **Reporting responsibilities of the CI**

When an SAE form is uploaded onto the trial website, the Trial Manager and CI will be automatically notified. The CI or Trial Manager will notify the sponsor within 24 hours of receiving completed forms for “un-expected” and 7 days of receiving completed forms for an “expected” SAE. The sponsor will then provide the final assessment of the SAE.

The CI (or Trial Manager) will report any “related *and* unexpected SAEs” to the main REC and the DMC within 15 days of the CI becoming aware of it. All other SAEs will be summarised and reported to the Ethics Committee, the Funder, the DMC and the Trial Steering Committee in their regular progress reports.

If all the required information is not available at the time of reporting, the Investigator must ensure that any missing information is provided as soon as this becomes available. It should be indicated on the report that this information is follow-up information of a previously reported event.

### **2.6. OUTCOME MEASURES**

This RCT will assess and compare adjustable anchored SIMS vs. tension-free SMUS in respect of: patient-reported success rates; objective success rates; impact on urinary symptoms, complications, recovery, health-related QoL and sexual function; costs to health services up to 3 years follow-up. We will use the same assessment tools and QoL instruments were used in our pilot RCT which observed a 97% response rate.

#### **2.6.1. Primary outcome measure**

The primary outcome measure will be patient-reported success rate measured by the validated PGI-I at 12-months. Patient-reported success rates reflect patients’ experience compared to the objective measures, which can overestimate the success of SUI surgery.<sup>27</sup> The primary outcome is assessed by the PGI-I: a 1-item questionnaire designed to assess the patient’s impression of changes in her urinary symptoms. The PGI-I asks the patient to best describe her urinary symptoms, compared with how they were before the study intervention, on a 7-point scale scored as: (1) “very much better,” (2) “much better,” (3) “a little better,” (4) “no change,” (5) “a little worse,” (6) “much worse,” or (7) “very much worse.” ‘Success’ will be defined as responses of ‘very much better’ or ‘much better’; this will determine whether the women are satisfied with their operation and hence consider their symptoms are resolved and not seek further treatments. The primary economic outcome will be incremental cost per QALY gained at 12-months. The above measures will also be assessed at 2 and 3 years.

#### **2.6.2. Secondary outcome measures**

- 2.6.2.1 Complications including: lower urinary tract injuries; haemorrhage (blood loss  $\geq$  200mls); post-operative voiding dysfunction; pain, mesh extrusion/erosion, dyspareunia, long-term self-catheterisation, new-onset or



- worsening urgency/ urgency incontinence.; assessed as appropriate at 3 and 12 months then yearly up-to 3 years
- 2.6.2.2 Post-operative pain using a pain Numerical Rating Scale (NRS): assessed day 1-14.
- 2.6.2.3 Objective success rates: assessed by 24 hour pad test at 12 months and yearly up to 3 years.
- 2.6.2.4 Other lower urinary tract symptoms using the International Consultation on Incontinence Questionnaire - Female Lower Urinary Tract Symptoms long form (ICIQ-FLUTS) and/or short form (ICIQ-SF) at 3and 12-months and yearly up to 3 years.
- 2.6.2.5 Health-related QoL profile (area under the curve) derived from EQ-5D, pain scores and ICIQ-LUTSqol measurements at 1,3 and 12-months and yearly up to 3 years
- 2.6.2.6 Impact on sexual function derived from ICIQ-FLUTsex/ or PISQ-IR measurements at; 12-months and yearly up to 3 years.
- 2.6.2.7 Recurrence of SUI, re-operation rates for SUI, further treatment received such as physiotherapy, medical treatment (Selective Nor-adrenaline Re-uptake Inhibitors and/ or Anti-muscarinic treatment).
- 2.6.2.8 Secondary economic outcomes include;
- NHS and patient primary and secondary care resource use and costs at 12-months and yearly up to 3 years.
  - Incremental cost-effectiveness derived from responses to the ICIQ-LUTS over the follow-up period at 12-months and yearly up to 3 years.
  - Incremental net benefit (NB) calculated from the responses to the discrete choice experiment (DCE) at end of the 3yr follow-up.

## 2.7. DATA COLLECTION AND PROCESSING

### 2.7.1. Measuring outcomes

Participant follow-up questionnaires will be triggered by date of surgery up-to 3months then by date of randomisation thereafter.

### 2.7.2. Schedule of data collection

The components of follow-up are shown in the table 1 below:

**Table 1 Source and timing of measures**

|                                                                 | Baseline | Surgery details | Day 1-14 | 4-weeks | 3-months | 12-months* | 20-months | Year 2 | Year 3 |
|-----------------------------------------------------------------|----------|-----------------|----------|---------|----------|------------|-----------|--------|--------|
| Clinical/surgery details                                        | ○        | ○               |          |         |          |            |           |        |        |
| Pain NRS/ Daily Text messaging                                  |          |                 | ●        | ●       |          |            |           |        |        |
| Recovery                                                        |          |                 |          | ●       | ●        |            |           |        |        |
| PGI-I                                                           |          |                 |          | ●       | ●        | ●          |           | ●      | ●      |
| EQ-5D                                                           | ○        |                 |          | ●       | ●        | ●          |           | ●      | ●      |
| ICIQ-LUTSqol                                                    | ○        |                 |          |         | ●        | ●          |           | ●      | ●      |
| ICIQ-FLUTS                                                      | ○        |                 |          |         |          | ●          |           | ●      | ●      |
| ICIQ-SF & UPS                                                   | ○        |                 |          |         | ●        | ●          |           | ●      | ●      |
| ICIQFLUT-Sex/ or PISQ-IR                                        | ○        |                 |          |         |          | ●          |           | ●      | ●      |
| 24-hours pad test                                               | ○        |                 |          |         |          | ●          |           | ●      | ●      |
| Home continence stress test                                     | ○        |                 |          |         |          | ●          |           | ●      | ●      |
| Health care resource utilisation/complications/recurrence/furth |          |                 |          |         | ●        | ●          |           | ●      | ●      |

|                             |  |  |  |  |  |  |   |  |   |
|-----------------------------|--|--|--|--|--|--|---|--|---|
| er treatment                |  |  |  |  |  |  |   |  |   |
| Time & travel questionnaire |  |  |  |  |  |  | • |  |   |
| DCE,                        |  |  |  |  |  |  |   |  | • |

○ Clinic/Hospital    ● Out-with clinic (e.g. post, email, phone, etc)

\* Taking into account the inevitable waiting time between randomisation and receiving the surgical treatment (average surgical waiting list is 8-12weeks) and in-addition the clinical importance of assessing the outcomes at 12 month postoperative, we aim to send the 1 year follow-up pack at 15 month post-randomisation. This strategy will ensure that the vast majority of participants are at least 12 month post-operative at time of capturing the primary outcome.

### 2.7.3. Data processing

Research Nurses will enter locally-collected data in the centres. Staff in the Study Office will work closely with local Research Nurses to ensure that the data are as complete and accurate as possible. Follow up questionnaires to participants will be sent from and returned to the Study Office in Aberdeen. Extensive range and consistency checks will further enhance the quality of the data.

## 2.8. SAMPLE SIZE, PROPOSED RECRUITMENT RATE AND MILESTONES

### 2.8.1. Sample size

A non-inferiority design is appropriate for this trial because the proportion having success at 12 months in women managed with SMUS is high. Adjustable anchored SIMS is not hypothesised to increase this proportion; however may have other potential benefits as outlined previously. It is therefore important to show that SIMS is clinically non-inferior to SMUS and to measure these other dimensions (such as cost-effectiveness, mediated through shorter stay and earlier recovery, QoL mediated through less pain, and any safety signals via the complication rate) in an adequately powered, pragmatic RCT with long enough follow up. It is essential therefore that the study is powered to demonstrate non-inferiority within an appropriate margin, and hence this clinical outcome is the correct choice as primary outcome. A 10% inferiority margin has been deemed by expert clinicians as the maximum inferiority margin in clinical effectiveness that would be accepted should SIMS prove to be superior in other outcomes such as shorter hospital stay, less postoperative pain, earlier recovery and more cost-effective. In such case, adjustable anchored SIMS would then reliably be able to be considered as a first line surgical treatment of women with primary SUI.

Published literature suggests that the P1, the percentage success rate at 12-months in the SMUS arm will be about 85%; identical results were confirmed by our pilot RCT. Estimating P2, the percentage of success in the adjustable anchored SIMS arm, is more difficult due to lack of published evidence; a crude meta-analysis of the 12 month outcome data from our multicentre pilot RCT and few other small studies indicates a similar P2 of 85%.

Power estimates were explored by simulating trials of fixed sample size (using equal allocation) with binary responses generated by P1 = 85% and P2 = 85%. Power was then estimated as the proportion of simulated trials where the lower bound of the 2-sided confidence interval satisfied P1-P2 > -10%. Simulations, run in Stata 11.2, show that a trial of 275 per arm or 550 in total is required for the lower bound of the estimated 95% confidence interval to rule inferiority at the specified level with 90% power. Adjustment for potential 15% drop-out inflates the trial to 650 in total. For comparison, a trial of this size would have above 80% power to test superiority on secondary outcomes of difference in means of size one quarter of a standard deviation (or 90% power to detect an effect size of 0.28 standard deviations).

1 In our multicentre pilot RCT;<sup>17</sup> 131/137 women (95.6%) completed the 12 month follow-up  
2 and showed no significant differences in the patient-reported success rate (OR 0.895;  
3 95%CI 0.344, 2.330; p=1.000) between adjustable anchored SIMS (Ajust®) vs. SMUS  
4 (TVT-O™) groups. These results, together with similar results from other studies detailed  
5 above<sup>16–21</sup> provide assurances for the reliability of our sample size calculations. A statistical  
6 reviewer previously queried whether we had considered the implications if in fact the  
7 success of the 2 procedures were not identical but slightly different. If we consider success  
8 rates of 84% and 85%, the study retains 90% power to detect a slightly larger margin of  
9 non-inferiority of around 11%, and so to all intents and purposes a sample size of 650  
10 remains adequate.

### 11 **2.8.2. Recruitment rates and milestones**

12 Our recruitment rate estimates are based on data from the pilot multicentre RCT comparing  
13 adjustable anchored SIMS (Ajust®) with SMUS (TVT-O™). We believe that these centres  
14 are representative of the UK; 137 women were recruited across 6 centres at a rate of 3.4  
15 per centre per month. Overall, 137/181 (76%) patients were willing to be randomised;  
16 however we have used a more conservative estimate of 50% in our recruitment projection.  
17 Therefore, it has been estimated that in order to approach 1300 eligible patients to  
18 randomise the required 650 patients, 25 centres would need a throughput of at least 90  
19 eligible patients per centre per year to recruit 3 patients per month. The recruitment  
20 projection is based on 18 months of recruitment (months 7-24 inclusive) and allows for set-  
21 up, holidays and waiting list times. We expect a staggered recruitment of centres with all  
22 centres active by the end of Month 18. The first 45 patients will be recruited by Month 12,  
23 256 patients by Month 18 and the remaining 367 patients by Month 24 making a total of  
24 668 patients.  
25  
26

27 The Gantt Chart and Recruitment Projection are in Appendix 4.  
28  
29

## 30 **3. ANALYSES PLAN**

### 31 **3.1. Statistical Analysis**

32 Treatment groups will be described at baseline and follow-up using numbers (with  
33 percentages), means (with standard deviations) and medians (with inter-quartile ranges)  
34 where relevant. Primary and secondary outcomes will be compared using generalised  
35 linear models, with adjustment for design covariates. As standard we also adjust all our  
36 surgical RCTs for centre/surgeon effects; adjustment for centre/surgeon will be by random  
37 effect in the trial analysis.  
38  
39

40 For the primary outcome, we plan to dichotomise the PGI-I responses with 'success'  
41 defined as 'very much better' or 'much better' and the rest of responses as failures; this will  
42 determine whether the women are satisfied with their operation and hence consider their  
43 symptoms are resolved and do not seek further treatments. In-addition, this definition of  
44 "success" is widely used within the research field of surgical treatment of SUI, and was  
45 used in our pilot RCT, and therefore will allow comparing our results to other trials in the  
46 literature. We will also perform a secondary analysis using ordinal regression on the 7-  
47 point PGI-I scale, so potentially using more of the information in the outcome. However, we  
48 do not propose adopting this ordinal regression as the primary analysis since the  
49 underlying proportional odds model makes strong assumptions about the consistency of  
50 treatment effect across the levels of response, and particularly in the context of a non-  
51 inferiority design there may be departures from those assumptions that would interfere with  
52 establishing whether the simple hypothesis around the (non-inferiority) of the binary  
53 'success' under the two operations had been shown.  
54  
55

56 The statistical analysis of the primary outcome will be by the usual intention-to-treat (ITT)  
57 and also a suitably defined per protocol (PP) analysis (to reflect the unique nature of non-  
58  
59

inferiority designs and the issue that ITT for such designs may not be the most conservative analysis and inflate the true type I error rate, given that in a non-inferiority design the null hypothesis is that the interventions are not non-inferior or equivalent). If the two approaches return material differences in interpretation this will be investigated carefully. Results will be displayed as estimates and 95% confidence intervals derived from appropriate generalised linear models. Confidence intervals around observed differences will then be compared to the pre-specified non-inferiority margin.

Secondary outcomes will be analysed similarly. Outcomes such as post-operative pain will be assessed under a superiority hypothesis as we believe that this will be lower in the intervention arm. As stated in the sample size section, there is above 80% power to detect a difference of a quarter of a standard deviation under a superiority hypothesis. Subgroup analyses (appropriately analysed by testing treatment by subgroup interaction) will explore possible treatment effect modification. All analyses will follow a carefully documented Statistical Analysis Plan. Pre specified subgroups are:

- Mixed incontinence versus pure stress incontinence
- Urodynamic versus Clinically diagnosis of Stress Urinary Incontinence.
- Adjustable Anchored SIMS vs. each type of SMUS (i.e. RP-TVT and TO-TVT separately)
- Comparison of the main types of SIMS
- We will also include an exploratory subgroup analysis comparing those above and below the observed median age of the recruited women using a formal test of interaction.
- Responses to 2 validated sexual function questionnaire: ICIQ-FLUTsex vs. PISQ-IR

**Effect of Pregnancy:** MUS procedures are generally offered to women after having completed their families and therefore subsequent pregnancy is usually a rare event that is unlikely to be balanced between both trial arms. If a woman falls pregnant after receiving treatment within the RCT, her data will be censored at the time of confirmed pregnancy for the primary analysis. This small number of women will still be followed up for all outcome data as usual, and if the numbers warrant, a sensitivity analysis including them will be undertaken on the primary outcome.

The Trial Steering Committee and an independent Data Monitoring and Ethics Committee (DMC) will be asked to review and comment on the Statistical Analysis Plan prior to analysis. There are no plans for any formal interim analyses to be seen by the DMC. A single main analysis will be performed on the 12 month primary outcome and repeated on the 2 and 3 year outcomes. The DMC will meet before recruitment begins, or as soon as practical, to agree the terms of reference and other procedures.

### 3.2. ECONOMIC EVALUATION

Our primary health economic evaluation will be from a health service provider's (NHS) perspective; however we will also present data from a wider societal perspective. These data will include costs to patients of time and travel, costs to carers and family members and costs to society as a whole, estimated from lost productivity as a result of time off work / away from normal activities.

#### 3.2.1. Collection of resource use and cost data

Health care resource use will be collected using patient administered questionnaires asking patients to retrospectively recall their contacts with health care professionals relating to their incontinence. This questionnaire will be administered at 3 & 12 months then yearly for 3 years. It is generally accepted that patient recall is accurate up to 12 months and it is highly unlikely that a patient would not remember significant events relating to their disease over this time period. Data collected will include secondary care contacts (hospital inpatient admissions, outpatient appointments) and primary care contacts (e.g. GP contacts, nurse

1 contacts, physiotherapist consultations) and prescription drug medications. These health  
2 care utilisation data will be combined with unit cost information for the use of specific  
3 resources using standard sources.<sup>29-31</sup> Data on costs for each group (SIMS and SMUS) will  
4 be summed to provide an average cost per patient trial participant. Sensitivity analysis will  
5 be used to explore various distributions of cost data as well as various methods for the  
6 imputation of missing and censored data. We will provide a comprehensive range of  
7 deterministic sensitivity analyses to test any assumptions we make in our analysis on the  
8 overall results. For example, we will test best and worst case scenarios for the intervention  
9 cost (whether all procedures in the SIMS arm are conducted under GA or LA). The impact  
10 of any missing data and methods of data imputation on our results will also be tested. We  
11 will test the impact of these and a range of other sensitivity analyses, to be determined as  
12 the trial progresses on all our results (e.g. cost utility analysis and cost benefit analysis).

### 13 14 15 **3.2.2. Participant costs**

16 Out of pocket patient expenses (including the purchase of containment products), private  
17 health care costs, travel costs and costs associated with lost days at work will also be  
18 collected using the patient administered questionnaire and incorporated into the patient  
19 perspective analysis. Costs of family members and/or carers will also be collected as part  
20 of the trial and reported.

### 21 22 **3.2.3 Quality of life**

23 Health state valuations will be based upon the responses to the ICIQ-LUTSqol (baseline,  
24 3, 12 months and annually over the follow up period) and EQ-5D administered at  
25 baseline, 1, 3 & 12 month and annually over the follow up period. These data will be  
26 transformed into utility values using standard algorithms. QALYs will be calculated, using  
27 the area under the curve methods, with any differences between groups being reported.  
28 Both measures will be compared and contrasted and tested for comparability in  
29 measuring outcomes for these women.

### 30 31 **3.2.4. Cost effectiveness**

32 The analysis will use the estimates of mean costs and QALYs as described for each trial  
33 participant to estimate the incremental cost-effectiveness ratio at 12-month follow-up  
34 period and where appropriate the analysis will mirror that of the statistical analyses.  
35 Cost-effectiveness (cost per QALY gained) will also be reported over the 3 year follow up  
36 period. The results of the analysis will be presented as incremental costs, effects and  
37 incremental cost per QALY. Bootstrapping of cost and QALY differences as well as a  
38 range of one way and multi-way deterministic sensitivity analyses will be conducted to  
39 address uncertainty in the estimates. Cost per QALY data will also be presented in the  
40 form of cost-effectiveness acceptability curves (CEAC).

### 41 42 **3.2.5. Discrete choice experiment (DCE)**

43 Previous research<sup>32</sup> has suggested that EQ-5D questionnaire may not fully capture the  
44 benefits from successfully treating incontinence. They may not fully represent patient  
45 preferences for treatments and their associated outcomes. Therefore, we will conduct a  
46 discrete choice experiment (DCE) to elicit preference for the process, patient experience  
47 and health outcomes. A DCE presents respondents with a series of hypothetical choices  
48 that describe the choice alternatives by their underlying attributes and ask respondents  
49 which alternative they prefer. The values of the attributes vary across choice scenarios, and  
50 by observing the choices people make it is possible to infer their preferences over the  
51 attributes of the goods under study. The extent to which an individual values an intervention  
52 depends upon the levels of these attributes.<sup>33</sup> DCEs are commonly used to identify  
53 people's preferences in a variety of non-market situations/services/commodities.<sup>34-36</sup>

54  
55  
56 The attributes and levels for the DCE will be informed by systematic literature searching  
57 and advice sought from clinical experts. Attributes might include preferences for general /  
58 local anaesthetic, preferences for pain levels, cure and improvement rates, impact on  
59

1 activities of daily living, etc. These attributes and levels will be combined to identify profiles  
2 that will be used to develop scenarios to present the study participants. The questionnaire  
3 will be piloted amongst a convenience sample to refine all practical aspects of the survey  
4 and to ensure that trade-offs can be made between the identified attributes. Once the pilot  
5 is complete and the questionnaire has been refined it will be administered to the trial  
6 participants at the end of the 3yrs follow-up.

7  
8 Experimental design techniques will be used to generate an efficient set of choices from  
9 which preferences will be estimated. Logistic regression techniques will be used to analyse  
10 the response data. A cost attribute will be included so that willingness to pay (WTP) can be  
11 estimated. The results of the DCE information will be combined with the clinical outcomes  
12 estimated from the trial to provide an estimate of mean willingness to pay for each of the  
13 two interventions. Results of the WTP aspect of the DCE will be presented as incremental  
14 Net Benefits (NB) between groups where NB will be measured as WTP less mean cost for  
15 each intervention. The intervention with the greatest net benefit will be deemed the most  
16 efficient. The results of this analysis will be compared and contrasted with the cost/QALY  
17 outcomes and will yield some information regarding the applicability of traditional QALY  
18 measurement to conducting economic evaluation in urinary incontinence. The resultant  
19 costs and utilities will be used to estimate preference based quality weights for this  
20 condition.

#### 21 **4. ORGANISATION: TRIAL MANAGEMENT AND OVERSIGHT ARRANGEMENTS**

##### 22 **4.1. Study Office in Aberdeen**

23 The Study Office is in the Centre for Healthcare Randomised Trials (CHaRT) based within  
24 the Health Services Research Unit, University of Aberdeen and provides day to day support  
25 for the clinical centres. The Trial Manager in CHaRT at Aberdeen will take responsibility for  
26 the day to day transaction of study activities. The Data co-ordinator will provide clerical  
27 support to the trial, including organising all aspects of the postal questionnaires (mailing,  
28 tracking, and entering returned data using the study web data entry portal). The CHaRT  
29 Quality Assurance Manager will oversee the demonstration that CHaRT's standard  
30 operating procedures for trials are being followed, including observance of the appropriate  
31 principles of GCP.  
32

33  
34 At the centres, the recruitment coordinators/ research nurses will be responsible for all local  
35 processes involved in identifying, consenting, and randomising the participants, along with  
36 facilitating the delivery of the intervention, under the supervision of the lead surgeon.  
37

38 The SIMS Study Office Team will meet formally at least monthly during the course of the  
39 study to ensure smooth running and trouble-shooting. Finally, we intend to produce a  
40 regular SIMS Newsletter for participants and collaborators to inform everyone of progress  
41 and maintain enthusiasm.  
42

##### 43 **4.2. Local organisation in sites**

44 The Local PI and research nurse will be responsible for all aspects of local organisation  
45 including identifying, consenting, and randomising the participants, along with facilitating  
46 the delivery of the intervention and notification of any problem or unexpected developments  
47 for the duration of the trial. They will be responsible for ensuring that study data is collected  
48 for baseline assessments, collecting and recording participant study data on study specific  
49 Case Report Forms and will log all the details onto the remote web-based data capture  
50 system as soon as practical after completion. The local PI will return all study documents  
51 to the study office in Aberdeen when requested.  
52

##### 53 **4.3. Project Management Group (PMG)**

54 The study will be supervised by a Project Management Group (PMG). The chair of this  
55 group will be the Chief Investigator (Mohamed Abdel-Fattah) and will consist of  
56 representatives from the Study Office and grant holders. The PMG will meet every 3  
57 months, including face-to-face in month 1 and month 6 in the first year. It is expected that,  
58  
59  
60

once the project is underway, the majority of these meetings will be held by teleconference; however, the PMG will also meet face-to-face at least annually. In addition, the PMG will also meet at the annual Trial Steering Committee meeting.

#### 4.4. Trial Steering Committee (TSC)

The study is overseen by a Trial Steering Committee (TSC). The membership of this committee is comprised of the four independent members along with the Co-Chief Investigators (John Norrie & Mohamed Abdel-Fattah) or a nominated delegate. The trial sponsors, other SIMS grant-holders and key members of the central office (e.g. the trial manager) can participate in TSC meetings but are not members. The funders will be notified in advance of meetings and a representative invited to attend. Other relevant experts may be invited to attend as appropriate. Details of the membership of the TSC can be found at the start of this protocol. CHaRT has adopted the TSC Charter adapted from the DAMOCLES Charter for DMCs and suggests to the independent TSC members that they adopt the Terms of Reference contained within. The TSC will meet approximately yearly.

#### 4.5. Data Monitoring Committee (DMC)

An independent Data Monitoring Committee (DMC) will be convened. The DMC will be made up of members listed at the start of this protocol, one of whom is an experienced statistician. After the trial has been initiated the DMC will initially meet to agree its terms of reference and other procedures. CHaRT has adopted the DAMOCLES Charter for DMCs and suggests to the independent DMC members that they adopt the Terms of Reference contained within.

The committee will meet regularly to monitor the unblinded trial data and serious adverse events and make recommendations as to any modifications that are required to be made to the protocol or the termination of all or part of the trial.

### 4.6. RESEARCH GOVERNANCE, DATA PROTECTION AND SPONSORSHIP

#### 4.6.1. Research Governance

The trial will be run under the auspices of CHaRT based at HSRU, University of Aberdeen. This will ensure compliance with Research Governance, and provide centralised trial administration, database support and economic and statistical analyses. CHaRT is a registered Clinical Trials Unit with particular expertise in running multicentre RCTs of complex and surgical interventions.

The PMG will ensure, through the TSC that adequate systems are in place for monitoring the quality of the study (compliance with GCP) and appropriate expedited and routine reports, to a level appropriate to the risk assessment of the study.

#### 4.6.2. Data protection

Data collected during the course of the research will be kept strictly confidential and accessed only by members of the trial team. Participant's details will be stored on a secure database under the guidelines of the 1998 Data Protection Act and regular checks and monitoring are in place to ensure compliance. Data are stored securely in accordance with the Act and archived to a secure data storage facility. The senior IT manager (in collaboration with the Chief Investigator) will manage access rights to the data set. Participants will be allocated an individual specific trial number and their details will be anonymised on the secure database. We anticipate that anonymised trial data may be shared with other researchers to enable international prospective meta-analyses. To comply with the 5th Principle of the Data Protection Act 1998, personal data will not be kept for longer than is required for the purpose for which it has been acquired.

#### 4.6.3. Sponsorship

The University of Aberdeen and NHS Grampian are the co-sponsors for the trial.

#### 4.7. QUALITY ASSURANCE

The trial will be monitored to ensure that the study is being conducted as per protocol, adhering to Research Governance, and the appropriate regulations. The approach to, and extent of, monitoring (specifying both central and on-site monitoring) will be specified in a trial monitoring plan which is usually initially determined by a risk assessment, undertaken prior to start of trial.

#### 4.8. DATA HANDLING, RECORD KEEPING AND ARCHIVING

Clinical data will be entered into the database by the local investigator and/or research nurse working in each hospital site, together with data from questionnaires completed at clinic. Questionnaires returned by post to the trial office will be entered there. Staff in the trial office will work closely with local research nurses to ensure that the data are as complete and accurate as possible. Extensive range and consistency checks will further enhance the quality of the data.

The co-sponsors are responsible for ensuring that trial data is archived appropriately. Essential data shall be retained for a period of at least 10 years following close of study.

#### 4.9. SATELLITE STUDIES

It is recognised, that the value of the study may be enhanced by smaller ancillary studies of specific aspects. Plans for these will be discussed in advance with the PMG. REC approval will be sought for any new proposal, if appropriate.

### 5. ETHICS AND REGULATORY APPROVALS

**5.1. Ethics Approval:** The North of Scotland Research Ethics Committee has reviewed and approved this study. The study will be conducted according to the principles of good clinical practice provided by Research Governance Guidelines. We believe this study does not pose any specific risks to individual participants beyond standard surgical procedures, nor does it raise any extraordinary ethical issues. Annual progress reports and a final report at the conclusion of the trial will be submitted to the North of Scotland REC within the timelines defined in the regulations.

**5.2. Finance and Insurance:** The trial is funded by a grant awarded by the NIHR Health Technology Assessment programme. The necessary trial insurance is provided by the University of Aberdeen.

### 6. Authorship Publication

All RCTs conducted by CHaRT have a commitment to publish the findings of the research. At a minimum this trial will have a results paper published in a peer-reviewed medical/scientific journal. If all grant-holders and researcher staff fulfil authorship rules, group authorship will be used under the collective title of 'the SIMS Trial Group'. The CI, and possibly other members of the trial group will take responsibility for drafting the paper and this will be recognised by line" the CI (as primary author), followed by the other authors *and* the SIMS Trial Group'.

For reports which arise from the trial but where some members do not fulfil authorship rules (for example, specialist sub-study publications), authorship should be attributed to CI and the named individual(s) *for* the SIMS Trial Group.



1 To safeguard the integrity of the main trial, reports of explanatory or satellite studies will  
2 not be submitted for publication without prior arrangement from the Project Management  
3 Group.

4 We intend to maintain interest in the study by publication of SIMS newsletters at intervals  
5 for staff and collaborators. Once the main report has been published, a lay summary of  
6 the findings will be sent in a final SIMS Newsletter to all involved in the trial. Further  
7 details on the publication policy can be found in Appendix 5.  
8  
9

## 10 **6. Discussion**

11 The SIMS study is a key outcome study that should answer the important research  
12 question of whether adjustable SIMS should be utilized in clinical practice as a first line  
13 surgical treatment option for women with primary SUI.  
14

15 This study is a pragmatic patient-oriented trial aiming to capture a true representation of the  
16 actual patient population. The inclusion/exclusion criteria were chosen to allow the  
17 capturing of the relevant patient group.  
18

19 This trial seeks to follow standard local patterns and pathways of care with the only  
20 additional intervention being randomisation between the two treatment strategies under test  
21 and collection of baseline and outcome information.  
22

23 The results will inform clinicians and policy makers on the cost-effectiveness of this  
24 relatively new technology compared to the SMUS. The long-term follow-up in the SIMS  
25 study is crucial to address the long-term successes rate and adverse events of MUS in  
26 general and SIMS in specific.  
27

### 28 **6.1. Dissemination:**

29 The dissemination plans include (1) HTA monograph; (2) presentation at international  
30 scientific meetings; (3) publications in high-impact open access peer-reviewed journals; (4)  
31 presentations at health economic and health services research meetings. The results of  
32 the trial will be included in the updates of NICE (National Institute of Clinical Excellence)  
33 and EAU (European Association of Urology) guidelines; these two specific guidelines  
34 directly influence practice of all the UK and worldwide specialists respectively. In-addition, a  
35 plain English language summary of the main findings and results will be presented for  
36 relevant patient organisations and communities, including the bladder and bowel  
37 foundation. This will ensure user relevance in dissemination of the results.  
38  
39  
40  
41

### 42 **6.2. Trial Status**

43 The SIMS study is currently recruiting in 20 UK research centres. The first patient was  
44 randomised on 4<sup>th</sup> February 2014 with follow-up completed at end of February 2020.  
45  
46  
47  
48  
49  
50  
51  
52  
53  
54  
55  
56  
57  
58  
59  
60

## REFERENCE LIST

1. *Urinary incontinence; full guideline. CG40 [document on the Internet]*. London: National Institute for Health and Clinical Excellence; 2006 [accessed January 2013]. URL: <http://guidance.nice.org.uk/CG40/Guidance/pdf/English>
2. Perry S, Shaw C, Assassa P, Dallosso H, Williams K, Brittain KR et al. An epidemiological study to establish the prevalence of urinary symptoms and felt need in the community: the Leicestershire MRC Incontinence Study. Leicestershire MRC Incontinence Study Team. *J Public Health Med* 2000;**22**:427-34
3. Fultz N, Girts T, Kinchen K, Nygaard I, Pohl G, Sternfeldt B. Prevalence, management and impact of urinary incontinence in the workplace. *Occupal Med* 2005;**55**:552-7.
4. Turner DA, Shaw C, McGrother CW, Dallosso HM, Cooper NJ, MRC Incontinence Team. The cost of clinically significant urinary storage symptoms for community dwelling adults in the UK. *BJU Int* 2004;**93**:1246-52
5. Fultz NH, Burgio K, Diokno AC, Kinchen KS, Obenchain R, Bump RC. Burden of stress urinary incontinence for community-dwelling women. *Am J Obstet Gynecol* 2003;**189**:1275-82
6. Papanicolaou S, Pons ME, Hampel C, Monz B, Quail D, Schulenburg MG et al. Medical resource utilisation and cost of care for women seeking treatment for urinary incontinence in an outpatient setting. Examples from three countries participating in the PURE study. *Maturitas* 2005;**52**:Suppl-47
7. Abrams P, Artibani W, Cardozo L, Khoury S, Wein A. *Clinical manual of incontinence in women*. Health Publications Ltd; 2005
8. Jacklin P, Duckett J, Renganathan A. Analytic model comparing the cost utility of TVT versus duloxetine in women with urinary stress incontinence. *Int Urogynecol J* 2010;**21**:977-84
9. Ogah J, Cody JD, Rogerson L. Minimally invasive synthetic suburethral sling operations for stress urinary incontinence in women. *Cochrane Database of Systematic Reviews* 2009; Issue 4 Art. No.: CD006375. DOI: 10.1002/14651858.CD006375.pub2
10. Assassa P, Moran P, Duckett J, Bsug B. Stress incontinence surgery in the UK (1). Pre-operative work up and intra-operative complications. Analysis of the British society of urogynaecology database. *Neurourol Urodyn* 2010;**29**:809-10
11. Lucas MG, Bosch RJJ, Burkhard FC, et al. EAU guidelines on surgical treatment of urinary incontinence. *Eur Urol* 2012;**62**:1118–29
12. Giberti C, Gallo F, Cortese P, Schenone M. The suburethral tension adjustable sling (REMEEX system) in the treatment of female urinary incontinence due to 'true' intrinsic sphincter deficiency: results after 5 years of mean follow-up. *BJU Int* 2011;**108**:1140–4
13. Barrington J, Archer R, Kulkarni M, Forrest A. The TRT Female Remeex System for recurrent female stress urinary incontinence: a 5-year follow-up study. *J Obstet Gynaecol* 2013;**33**:391–3
14. Gadjiev N, Tabaza R, Kirschner-Hermanns R. Mini-sling: what is known about anchorage systems? *Neurourol Urodyn* 2012;**31**: 709–1102
15. Kocjancic E, Sedlar A. A strength comparison of immediate and delayed extraction forces of 5 different single incision slings anchor types: an animal model. *Int Urogynaecol J (Suppl 2)*:2012:S115
16. Abdel-fattah M, Agur W, Abdel-All M, Guerrero K, Allam M, Mackintosh A et al. Prospective multi-centre study of adjustable single-incision mini-sling (Ajust() ) in the management of stress urinary incontinence in women: 1-year follow-up study. *BJU Int* 2012;**109**:880-6.
17. Mostafa A, Agur W, Abdel-All M, Guerrero K, Lim C, Allam M et al. Multicentre prospective randomised study of single-incision midurethral sling (SIMS- Ajust) versus tension-free vaginal tapeobturator (TVT-OTM) in management of female stress urinary incontinence (SUI): A minimum of one year follow-up. *Urology* 2013; <http://dx.doi.org/10.1016/j.urology.2013.02.080>
18. Schweitzer K.J, Cromheecke A.K, Milani H.W., Van Eijndhoven D, Gietelink E, Hallenleben C.H et al. A Randomized Controlled Trial Comparing The Tvt-OO® With

- 1 The Ajust® As Primary Surgical Treatment Of Female Stress Urinary Incontinence. *Int*  
2 *Urogynecol J* 2012;**23**(Suppl 2):S77-S78
- 3 19. Cornu JN, Ciofu C, Sebe P, Peyrat L, Haab F. Cure Of Women Stress Urinary  
4 Incontinence With The Ajust Single Incision Sling: One Year Results. *Neurourol*  
5 *Urodyn* 2011;**30**:868
- 6 20. Lucente V, Cornu JN, Sebe P, Peyrat L, Ciofu C, Haab F. Ajust single incision  
7 transobturator sling procedure for stress urinary incontinenvce in women. *Int*  
8 *Urogynecol J* 2011;**22**(Suppl 2):S1041
- 9 21. Meschia M, Barbacini P, Baccichet R, Buonaguidi A, Maffiolini M, Ricci L et al. Short-  
10 term outcomes with the Ajust™ system: a new single incision sling for the treatment of  
11 stress urinary incontinence. *Int Urogynecol J* 2011;**22**:177-82
- 12 22. Mostafa A, Lim C, Madhurvata P, Abdel-fattah M. Single-Incision Mini-Slings Versus  
13 Standard Midurethral Slings in Surgical Management of Female Stress Urinary  
14 Incontinence: An Updated Systematic Review and Meta-analysis of Effectiveness and  
15 Complications. *Eur Urol* (2013), <http://dx.doi.org/10.1016/j.eururo.2013.08.032>
- 16 23. Sivaslioglu AA, Unlubilgin E, Aydogmus S, Keskin L, Dolen I. A prospective  
17 randomized controlled trial of the transobturator tape and tissue fixation mini-sling in  
18 patients with stress urinary incontinence: 5-year results. *J Urol* 2012;**188**:194-9
- 19 24. Naumann G, Hagemeyer T, Zachmann S, Ali-Ani A, Skala C, Albrich S. Ajust™ fully  
20 adjustable single incision sling for the treatment of stress urinary incontinence: 1 year  
21 follow-up on a new minimal-invasive treatment for female SUI. *Int Urogyneco J*  
22 2011;**22**(Suppl 2):S1050
- 23 25. Boyers D, Kilonzo M, Mostafa A, Abdel-fattah M. Single incision mini-slings versus  
24 standard mid-urethral slings in surgical management of female stress urinary  
25 incontinence: A costeffectiveness analysis alongside a randomised controlled trial.  
26 *Neurourol Urodyn* 2012;**31**:726-7
- 27 26. U. Ulmsten, L. Henriksson, P. Johnson and G. Varhos, An ambulatory surgical  
28 procedure under local anesthesia for treatment of female urinary incontinence. *Int*  
29 *Urogynecol J* 1996; 7: 81–86.
- 30 27. E. Delorme, Transobturator urethral suspension: mini-invasive procedure in the  
31 treatment of stress urinary incontinence in women, *Prog Urol* **11** 2001; 6: 1306–1313.
- 32 28. De Leval J. Novel surgical technique for treatment of female stress urinary  
33 incontinence: transobturator vaginal tape inside-out. *Eur Urol* 2003; 44: 724–30.
- 34 29. *NHS speciality costs: acute costs [database on the Internet]*. Edinburgh: Information  
35 Services Division (ISD) Scotland; 2010 [accessed January 2013].URL:  
36 [http://www.isdscotland.org/Health-Topics/Finance/Costbook/Speciality-Costs/Acute-](http://www.isdscotland.org/Health-Topics/Finance/Costbook/Speciality-Costs/Acute-Surgical.asp)  
37 [Surgical.asp](http://www.isdscotland.org/Health-Topics/Finance/Costbook/Speciality-Costs/Acute-Surgical.asp)
- 38 30. *NHS reference costs 2011-12 [document on the Internet]*. UK Department of Health;  
39 2012 [accessed January 2013]. URL: [http://www.dh.gov.uk/health/2012/11/2011-12-](http://www.dh.gov.uk/health/2012/11/2011-12-reference-costs/)  
40 [reference-costs/](http://www.dh.gov.uk/health/2012/11/2011-12-reference-costs/)
- 41 31. *British National Formulary [website on the Internet]*. British Medical Association and  
42 Royal Pharmaceutical Society; 2013 [accessed January 2013].  
43 URL:<http://www.bnf.org/bnf/index.htm>
- 44 32. Imamura M, Abrams P, Bain C, Buckley B, Cardozo L, Cody J et al. Systematic review  
45 and economic modelling of the effectiveness and cost-effectiveness of non-surgical  
46 treatments for women with stress urinary incontinence. *Health Technol Assess*  
47 2010;**14**(40)
- 48 33. Ryan M, Watson V, Amaya-Amaya M. Methodological issues in the monetary valuation  
49 of benefits in healthcare. *Expert Rev Pharmacoecon Outcome Res* 2003;**3**:717-27.
- 50 34. Bateman I, Carson R, Day B, Hanemann M, Hanley N, Hett T. *Economic valuation with*  
51 *stated preference techniques: A manual*. UK Department of Transport; Edward Elgar  
52 Publishing; 2002
- 53 35. Hensher D.A, Rose J.M, Greene W.H. The implications on willingness to pay of  
54 respondents ignoring specific attributes. *Transportation* 2005;**32**:203-22.
- 55 36. Louviere J.J, Hensher D.A, Swait J. *Stated choice methods: analysis and application*.  
56 Cambridge: Cambridge University Press; 2000
- 57  
58  
59  
60

1 **Funding Statement:** This is a UK Collaborative Study funded by the NIHR Evaluation,  
2 Health Technology Assessment (HTA) Programme - Funder Number 12/127/157  
3

4 **Authors' Contributions:** MAF conceived the idea and wrote the protocol; JN contributed  
5 to the study design and the statistical analysis; GML contributed to the study design, the  
6 sample size calculation and wrote the statistical analysis plan; MK designed and wrote the  
7 economic analysis plan; PA contributed to the clinical aspects of the protocol; JND  
8 contributed to the study design and clinical aspects of the protocol; JW contributed the  
9 layman summary as the patient representative; KM contributed to the study design, flow/  
10 gantt charts; TD and AMD contributed to the trial oversight and the protocol amendments.  
11

12 **Competing Interests:** MAF has been previously speaker and or trainer for Bard, Astellas,  
13 Pfizer, AMS and Coloplast. He received travel grants to attend medical conferences from  
14 various companies and previously performed a research-led project funded by a research  
15 Grant from Coloplast which was received and administered by University of Aberdeen.  
16 MAF was the Chairman of Scottish Pelvic Floor Network which received support from  
17 different pharmaceutical and devices Companies. MAF and Phil Assassa have provided  
18 industry-sponsorship proctorship training sessions to a number of surgeons training in  
19 SIMS prior to the study. None of the co-applicants have any financial interest, shares or sit  
20 on the advisory board for any relevant device companies.  
21  
22  
23  
24  
25  
26  
27  
28  
29  
30  
31  
32  
33  
34  
35  
36  
37  
38  
39  
40  
41  
42  
43  
44  
45  
46  
47  
48  
49  
50  
51  
52  
53  
54  
55  
56  
57  
58  
59  
60

## Appendix 1

### Local Anaesthesia (LA) Guidance for SIMS RCT

#### Pre-operative Analgesia:

**All participants, in both arms, should receive within 30-60 minutes of the operation:**

- Paracetamol Oral/PR 1gm and NSAID (Diclofenac Sodium -100mg or Ibuprofen 400mg – Oral/ PR) and,
- Oral opiate analgesia (Oral morphine 10-20 mg or MST Continus 10-30mg) if not contra-indicated; (the lower doses are to be used in women  $\geq$  65 years) and,
- EMLA cream applied vaginally to the sub-urethral area by the patient/ nurse (a 5% emulsion preparation, containing 2.5% each of lidocaine/prilocaine)
- Optional:
  - Instillagel 5ml intra-urethral by the nurse (anaesthetic, lubricant).
  - For anxious patients: oral anxiolytic (Temazepam 10-20 mg) can be given if not contra-indicated (if so please consider omitting the opiate analgesia).
  - Consider oral /IM anti-emetics in women receiving opiate analgesia

#### Local Anaesthesia:

- Fast-acting LA: Infiltrate 4-5 mls of Lignocaine 1% with adrenaline 1:200,000 (max dose 3.5mg/kg bodyweight) into the peri-urethral area at site of future application of instruments (using orange needle 25G). This is fast acting LA, in-addition to the EMLA cream, will allow you to apply instruments to the peri-urethral area.

- Long-acting LA: Infiltrate  $\pm$  40mls of Levo-Bupivacaine 2.5mg/ml (Chirocaine - max dose 1.5 mg/kg bodyweight) OR, Bupivacaine 0.25% with adrenaline 1:200,000 (Carbostesin - max dose 2 mg/kg bodyweight) into:

- a) the vaginal angles (using green needle 21G) until the bilateral vaginal sulci are obliterated (5 mls on each side)
- b) the obturator membrane and muscles (using curved black spinal needle 22G to hook behind the inferior pubic ramus; 10 mls on each side).

- Once the para-urethral tunnels are dissected up-to the obturator membranes, further infiltration (using Pudendal block or Spinal needle), into the exact site of insertion of the SIMS anchor is recommended using fast acting LA (5mls) and followed by long-acting LA (5mls) on each side.

- ❖ Patients should accompanied by a dedicated nurse during the operation for support.
- ❖ All doses should to be tailored to patients' medical condition and weight.
- ❖ We recommend you adhere to this guidance however deviation in the way of infiltration or the type of LA is accepted provided you keep within the general types and appropriate doses described.

SIMS - RCT LA Guidance V2 - Feb 2014

Appendix 2: Postoperative Voiding Assessment Protocol:

Pathway for Postoperative Voiding Assessment & Management of Voiding Dysfunction for Women Following Surgery for Mid-urethral slings

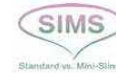

This applies to patients who were not catheterised postoperatively, or after removal of the urethral catheter (and after stopping IV fluids if applicable).

1. Encourage average fluid intake: 150-200mls/ hour (1 glass/hour).
2. Patients should empty their bladder/3-4 hours and encouraged to try to hold in-between if possible.
3. 1st void should be expected within 4 hours (may need prompting by nursing staff); otherwise a bladder-scan assessment is required to rule out retention.
4. Measure Voided Volume (VV) and Post-voiding Residual Urine (PVR) using Bladder-scan following each void. "Satisfactory Voiding" is achieved when PVR  $\leq$  1/3 of bladder capacity and  $\leq$  150mls.
5. Patients can be instructed in "Double Voiding" (void twice with 5 minutes interval & scanned for PVR after the second void; VV is then measured as total of the 2 voids).

| Examples of Satisfactory Voiding |            |
|----------------------------------|------------|
| VV (mls)                         | PVR (mls)  |
| 200                              | $\leq$ 120 |
| $\geq$ 250                       | $\leq$ 150 |

Once satisfactory Voiding is achieved (one assessment); patient can be discharged

N.B. In some units, surgeons leave 200 mls in bladder after cystoscopy so that patients feel the desire to pass urine early.

Management of Patients with Unsatisfactory Voiding Assessment:

Patients with PVR > 150mls after 1st assessment as above; should be encouraged to try to void again within 20min or so and the VV measured

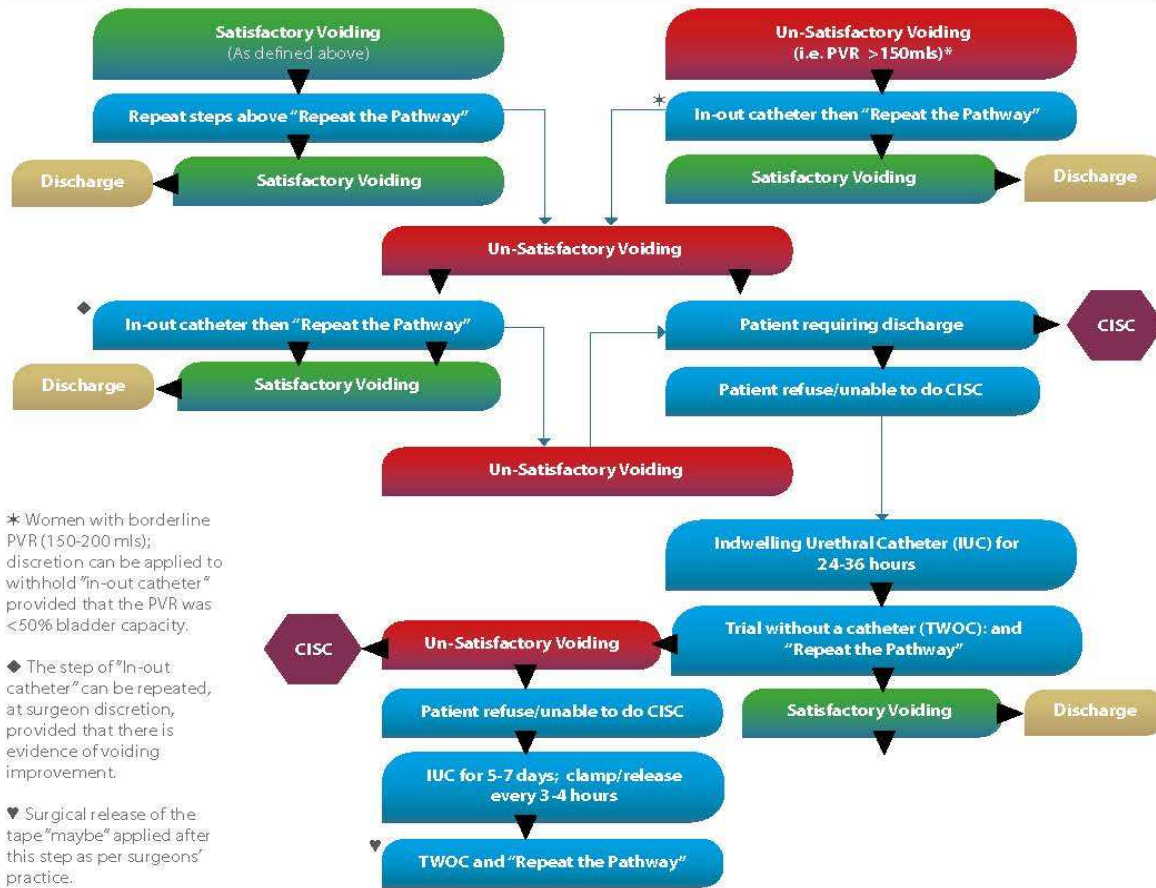

\* Women with borderline PVR (150-200 mls); discretion can be applied to withhold "in-out catheter" provided that the PVR was <50% bladder capacity.

◆ The step of "In-out catheter" can be repeated, at surgeon discretion, provided that there is evidence of voiding improvement.

♥ Surgical release of the tape "maybe" applied after this step as per surgeons' practice.

Management of CISC

Frequency of CISC/ day can be indicated by the level of the PVR (or per surgeon practice as no robust clinical evidence to base a recommendation) – see example below:

| PVR (> mls) | CISC/ day |
|-------------|-----------|
| 50 - 300    | 2         |
| 300 - 400   | 3         |
| >400        | 4         |

Patients would be instructed to keep records of VV & PVR (for 2 days/week) and follow-up is arranged (can be phone/ email/ in-person) in 1-2 weeks to check the volumes and the need to continue on CISC. If continuing, please check if any difficulties performing; whether the frequency needs to be altered and date of next review.

No need for "routine prescribing" of prophylactic antibiotics however local estrogen treatment can be considered in postmenopausal women.

### Appendix 3: Objective Assessment of Urinary Incontinence within the SIMS Trial - Protocol

- Participants will receive: ≥4 pre-weighed pads in two transparent self-sealing plastic bags (for the 24 hour pad test), 2 tissue continence sheets (for the home continence stress tests - HCST), instructions on how to perform the tests and a test evaluation questionnaire.
- Each participant will be asked to:-
  - Perform a standardised HCST.
  - Perform the 24-hours pad test (as described by the international continence society) using the provided pre-weighed pads.
  - Repeat the HCST at the end of the 24 hour pad test.
  - Report all their observations on the provided test questionnaire.
- At the end of the tests, women will be asked to complete an open question regarding their experience of the tests. Women's satisfaction/convenience with each test will also be assessed using 10-point Likert scales.
- **Pre-operatively**, participants will be asked to perform this test 24 hours prior to their operation and return any used pads and the test questionnaire to the local RN/team on the day of their surgery. The returned pads will be weighed using a gram sensitive scale and the pad gain, if any, will be calculated and recorded.
- **At 1, 2 and 3 years postoperative**, participants will return the completed test questionnaire and any used pads in the self-addressed pre-paid envelope provided within 24 hours of completion.
- The returned pads will be weighed by the researcher using a gram sensitive scale and the pad gain, if any, will be calculated and recorded.

1  
2  
3  
4  
5  
6  
7  
8  
9  
10  
11  
12  
13  
14  
15  
16  
17  
18  
19  
20  
21  
22  
23  
24  
25  
26  
27  
28  
29  
30  
31  
32  
33  
34  
35  
36  
37  
38  
39  
40  
41  
42  
43  
44  
45  
46  
47  
48  
49

Appendix 4A:

The Gantt chart:

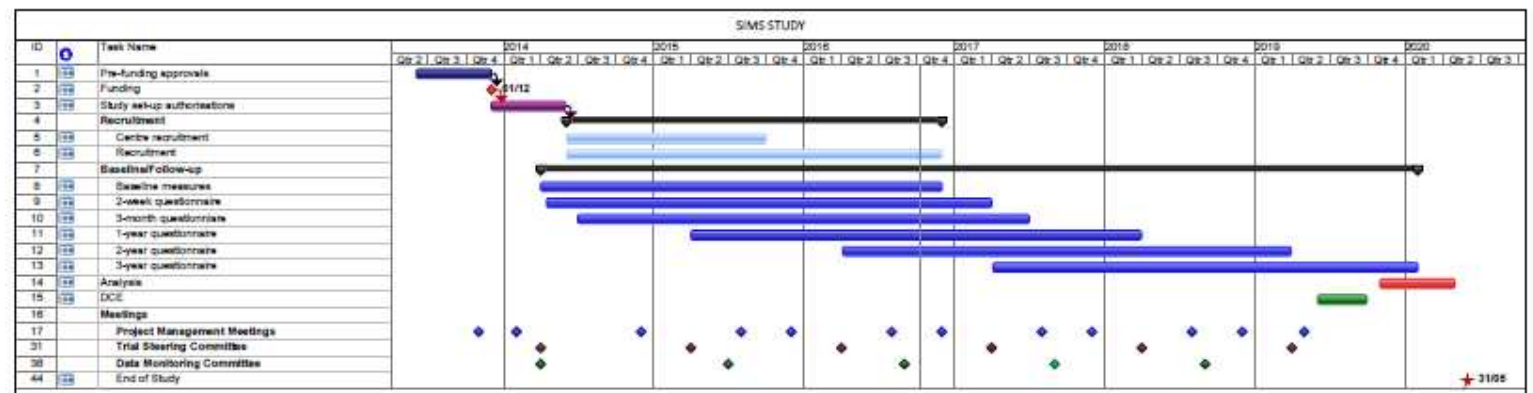

CONFIDENTIAL Review only



Appendix 4B: Recruitment projection:

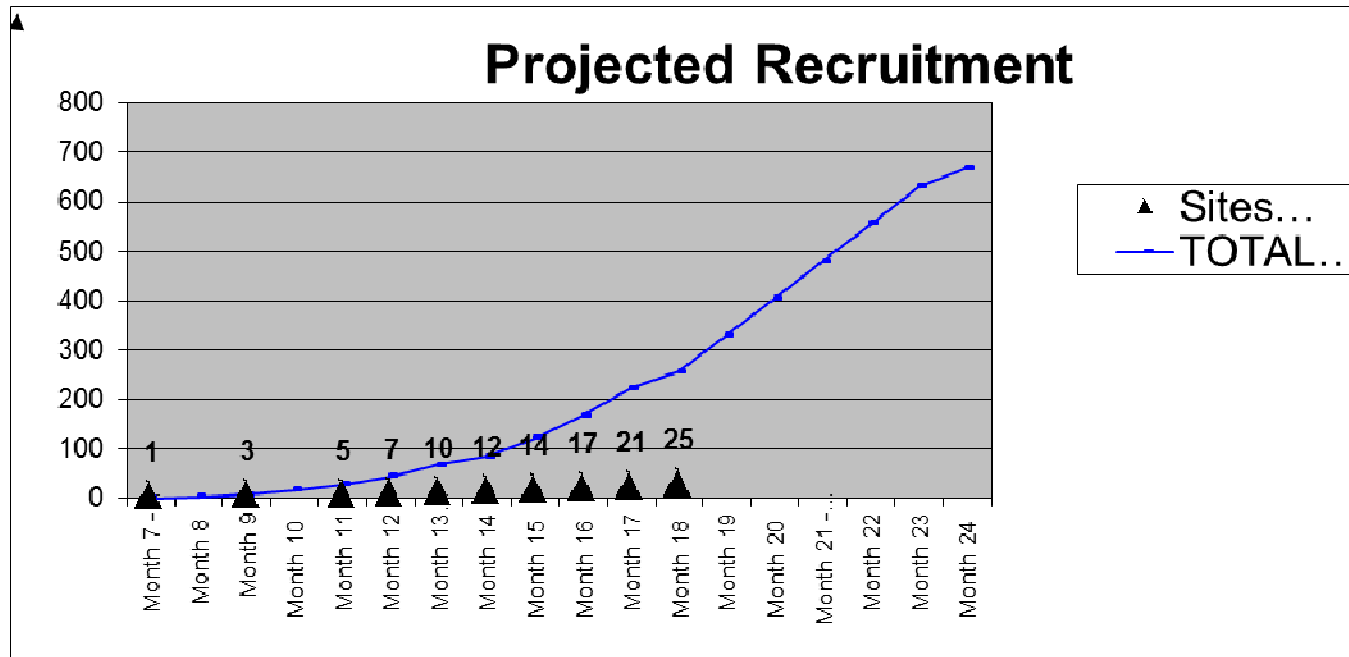

CONFIDENTIAL only

1  
2  
3  
4  
5  
6  
7  
8  
9  
10  
11  
12  
13  
14  
15  
16  
17  
18  
19  
20  
21  
22  
23  
24  
25  
26  
27  
28  
29  
30  
31  
32  
33  
34  
35  
36  
37  
38  
39  
40  
41  
42  
43  
44  
45  
46  
47  
48  
49

1  
2  
3  
4  
5  
6  
7  
8  
9  
10  
11  
12  
13  
14  
15  
16  
17  
18  
19  
20  
21  
22  
23  
24  
25  
26  
27  
28  
29  
30  
31  
32  
33  
34  
35  
36  
37  
38  
39  
40  
41  
42  
43  
44  
45  
46  
47  
48  
49  
50  
51  
52  
53  
54  
55  
56  
57  
58  
59  
60

For peer review only  
CONFIDENTIAL Abdel-fattah

# BMJ Open

## The SIMS Trial; Adjustable Anchored Single-Incision Mini-Slings Versus Standard Tension-Free Mid-Urethral Slings in the Surgical Management Of Female Stress Urinary Incontinence; A Study Protocol for A Pragmatic Multicentre Non-Inferiority Randomised Controlled Trial

|                                 |                                                                                                                                                                                                                                                                                                                                                                                                                                                                                                                                                                                                                           |
|---------------------------------|---------------------------------------------------------------------------------------------------------------------------------------------------------------------------------------------------------------------------------------------------------------------------------------------------------------------------------------------------------------------------------------------------------------------------------------------------------------------------------------------------------------------------------------------------------------------------------------------------------------------------|
| Journal:                        | <i>BMJ Open</i>                                                                                                                                                                                                                                                                                                                                                                                                                                                                                                                                                                                                           |
| Manuscript ID                   | bmjopen-2016-015111.R1                                                                                                                                                                                                                                                                                                                                                                                                                                                                                                                                                                                                    |
| Article Type:                   | Protocol                                                                                                                                                                                                                                                                                                                                                                                                                                                                                                                                                                                                                  |
| Date Submitted by the Author:   | 30-Jan-2017                                                                                                                                                                                                                                                                                                                                                                                                                                                                                                                                                                                                               |
| Complete List of Authors:       | Abdel-fattah, Mohamed; University of Aberdeen, Obstetrics and Gynaecology<br>Maclennan, Graeme; University of Aberdeen, Health Services Research Unit<br>Kilonzo, M; University of Aberdeen<br>Assassa, R Phil ; Spire Hospitals<br>McCormack, Kirsty ; University of Aberdeen, CHaRT - Health Services Research Unit<br>Davidson, Tracey; CHaRT, HSRU, University of Aberdeen<br>McDonald, Alison; University of Aberdeen, Health Services Research Unit<br>NDow, James; University of Aberdeen, Surgery<br>Wardle, Judith; Patient Representative<br>Norrie, John; Uniersity of Aberdeen, Health Services Research Unit |
| <b>Primary Subject Heading</b>: | Obstetrics and gynaecology                                                                                                                                                                                                                                                                                                                                                                                                                                                                                                                                                                                                |
| Secondary Subject Heading:      | Health services research, Health economics, Urology                                                                                                                                                                                                                                                                                                                                                                                                                                                                                                                                                                       |
| Keywords:                       | stress urinary Incontinence, TENSION-FREE VAGINAL TAPES, Single Incision Slings, Mid-urethral slings                                                                                                                                                                                                                                                                                                                                                                                                                                                                                                                      |
|                                 |                                                                                                                                                                                                                                                                                                                                                                                                                                                                                                                                                                                                                           |

SCHOLARONE™  
Manuscripts

1  
2  
3  
4  
5  
6  
7

## The SIMS Trial; Adjustable Anchored Single-Incision Mini-Slings Versus Standard Tension-Free Mid-Urethral Slings in the Surgical Management Of Female Stress Urinary Incontinence; A Study Protocol for A Pragmatic Multicentre Non-Inferiority Randomised Controlled Trial

8  
9  
10  
11

A UK Collaborative Study funded by the NIHR Evaluation, Health Technology Assessment (HTA) Programme - Funder Number 12/127/157

12  
13

### Authors:

14  
15  
16

Mohamed Abdel-Fattah, MD, FRCOG♣  
Senior Clinical Lecturer/Consultant Urogynaecologist- University Of Aberdeen

17  
18  
19

Graeme MacLennan  
Senior Statistician, Health Services Research Unit (HSRU), University of Aberdeen

20  
21  
22

Mary Kilonzo  
Senior Health Economist, Health Economics Research Unit, University of Aberdeen

23  
24  
25

Mr R Phil Assassa, FRCOG.  
Consultant Gynaecologist, Spire Hospitals.

26  
27  
28

Kirsty McCormick  
Research Manager, Centre for Healthcare Randomised Trials (CHaRT), University of Aberdeen

29  
30  
31

Tracey Davidson  
Trial Manager, CHaRT, University of Aberdeen

32  
33  
34

Alison McDonald  
Senior Trial Manager, CHaRT, University of Aberdeen

35  
36  
37

James N'Dow, MD, FRCS.  
Chair in Surgery (Clinical), Academic Urology Unit, University of Aberdeen

38  
39  
40

Judith Wardle  
Patient Representative

41  
42  
43

John Norrie  
Professor of Clinical Trials, HSRU, University of Aberdeen

44  
45  
46

### ♣ Corresponding Author:

47  
48  
49

Dr. M. Abdel-Fattah,  
Senior Lecturer, Division of Applied Health Sciences, University of Aberdeen

50  
51  
52  
53  
54

Address: Second Floor, Aberdeen Maternity Hospital, Foresterhill, Aberdeen, AB25 2ZH, UK  
Tel: 01224438424  
E-mail: [m.abdelfattah@abdn.ac.uk](mailto:m.abdelfattah@abdn.ac.uk)

**Abstract:****Introduction:**

Single incision mini-slings(SIMS) represent the 3<sup>rd</sup> generation of mid urethral slings(MUS). They have been developed with the aim of offering a true ambulatory procedure for treatment of female stress urinary incontinence(SUI) with reduced morbidity and earlier recovery while maintaining similar efficacy to Standard mid-urethral slings(SMUS). The aim of this study is to determine the clinical and cost- effectiveness of adjustable anchored SIMS compared to tension-free SMUS in the surgical management of female SUI, with 3-years follow-up.

**Methods and analysis:**

A pragmatic multicentre non-inferiority randomised controlled trial

**The primary outcome measure** is the patient-reported success rate measured by the Patient Global Impression of Improvement(PGI-I) at 12-months. The primary economic outcome will be incremental cost per QALY gained at 12-months.

**Secondary outcome measures include:** Adverse events; Objective success rates; Impact on other lower urinary tract symptoms; Health-related quality of life (QoL) profile and sexual function; and re-operation rates for SUI.. **Secondary economic outcomes include:** NHS and patient primary and secondary care resource use and costs; Incremental cost-effectiveness; and Incremental net benefit.

**The statistical analysis** of the primary outcome will be by intention-to-treat (ITT) and also a per protocol (PP) analysis. Results will be displayed as estimates and 95% confidence intervals. Confidence intervals around observed differences will then be compared to the pre-specified non-inferiority margin. Secondary outcomes will be analysed similarly.

**Ethics and dissemination:**

The North of Scotland Research Ethics Committee has approved this study(13/NS/0143).

The dissemination plans include HTA monograph; presentation at international scientific meetings; and publications in high-impact open access journals; the results will be included in the updates of NICE and EAU (European Association of Urology) guidelines; these two specific guidelines directly influence practice in the UK and worldwide specialists respectively. In-addition, plain English language summary of the main findings/results will be presented for relevant patient organisations.

**Registration details: ISRCTN93264234**

The SIMS study is currently recruiting in 20 UK research centres. The first patient was randomised on 4<sup>th</sup> February 2014 with follow-up completed at end of February 2020.

**Strengths and limitations of this study:****Strengths:**

- The study design is a multicentre randomised controlled trial; the gold standard study design to assess surgical interventions.
- The pragmatic nature of the study (with few inclusion or exclusion criteria) ensures the generalisability of the results (i.e. the findings will be applicable to most women and most surgeons in the NHS).
- The study protocol ensures surgeons' experience in both study arms prior to participation. This avoids the potential bias associated with limited surgical experience with relatively new surgical techniques.
- Primary outcome is the patient-reported success rate obtained by a validated instrument. Patient-reported outcomes are recognised as the most relevant clinical trial outcomes in this field.
- Outcomes are obtained by postal questionnaires; this eliminates the assessor bias.
- An integrated health economic analysis is a major strength
- The analysis plan for this non-inferiority design randomised trial includes both Intention to treat and per-protocol analysis
- Similar protocol was used in other similar trials worldwide allowing comparison of the results and relevant meta-analysis.

**Limitations:**

- The lack of an objective assessment post-intervention can be seen by some as a limitation.

| GLOSSARY OF ABBREVIATIONS |                                                                                                                                                    |
|---------------------------|----------------------------------------------------------------------------------------------------------------------------------------------------|
| AE                        | Adverse Event                                                                                                                                      |
| AUC                       | Area under the curve                                                                                                                               |
| BSUG                      | British Society of Urogynaecology                                                                                                                  |
| CEAC                      | Cost-effectiveness Acceptability Curve                                                                                                             |
| CHaRT                     | Centre for Healthcare Randomised Trials                                                                                                            |
| CI                        | Chief Investigator                                                                                                                                 |
| CI                        | Confidence Interval p11                                                                                                                            |
| CONSORT                   | Consolidated Standards of Reporting Trials                                                                                                         |
| CTU                       | Clinical Trial Unit                                                                                                                                |
| DCE                       | Discrete Choice Experiment                                                                                                                         |
| DMC                       | Data Monitoring Committee                                                                                                                          |
| EQ-5D                     | EuroQol Group's 5 dimension health status questionnaire                                                                                            |
| FU                        | Follow up                                                                                                                                          |
| GA                        | General Anaesthetic                                                                                                                                |
| GCP                       | Good Clinical Practice                                                                                                                             |
| GP                        | General Practitioner                                                                                                                               |
| HCST                      | Home continence stress test                                                                                                                        |
| HRQoL                     | Health Related Quality of Life                                                                                                                     |
| HSRU                      | Health Services Research Unit                                                                                                                      |
| HTA                       | Health Technology Assessment                                                                                                                       |
| ICIQ-FLUTS                | International Consultation on Incontinence Modular Questionnaire – Female Lower Urinary Tract Symptoms                                             |
| ICIQ-FLUTS-SEX            | International Consultation on Incontinence Modular Questionnaire – Female Lower Urinary Tract Symptoms – Gender specific sexual matters module     |
| ICIQ-LUTS QOL             | International Consultation on Incontinence Modular Questionnaire – Female Lower Urinary Tract Symptoms – Condition specific quality of life module |
| ICIQ-SF                   | International Consultation on Incontinence Modular Questionnaire – short form                                                                      |
| ISRCTN                    | International Standard Randomised Controlled Trial Number                                                                                          |
| ITT                       | Intention to treat                                                                                                                                 |
| IVR                       | Interactive Voice Response (randomisation)                                                                                                         |
| LA                        | Local anaesthetic                                                                                                                                  |
| LUT                       | Lower urinary tract                                                                                                                                |
| MS                        | Multiple Sclerosis                                                                                                                                 |
| MUS                       | Mid-urethral slings                                                                                                                                |
| N                         | Newtons                                                                                                                                            |
| NB                        | Net benefit                                                                                                                                        |
| NHS                       | National Health Service                                                                                                                            |
| NHSG                      | National Health Service Grampian                                                                                                                   |
| NICE                      | National Institute for Clinical Excellence                                                                                                         |
| NIHR                      | National Institute Health Research                                                                                                                 |
| NRS                       | Numerical rating scale                                                                                                                             |
| OAB                       | Overactive bladder                                                                                                                                 |
| OR                        | Odds Ratio                                                                                                                                         |
| PFMT                      | Pelvic Floor Muscle Training                                                                                                                       |
| PI                        | Principal Investigator                                                                                                                             |
| PIL                       | Patient Information Leaflet                                                                                                                        |
| PISQ-IR                   | Pelvic Organ Prolapse/Urinary Incontinence Sexual Questionnaire                                                                                    |

|    |        |                                                |
|----|--------|------------------------------------------------|
| 1  | PMG    | Project Management Group                       |
| 2  | POP-Q  | Pelvic organ prolapse quantification system    |
| 3  | PP     | Per protocol                                   |
| 4  | PVR    | Post-voiding residual urine volume             |
| 5  | QALY   | Quality Adjusted Life Year                     |
| 6  | QoL    | Quality of Life                                |
| 7  | RCT    | Randomised Controlled Trial                    |
| 8  | R&D    | Research and Development                       |
| 9  | REC    | Research Ethics Committee                      |
| 10 | RN     | Research nurse                                 |
| 11 | RP-TVT | Retropubic tension-free vaginal tape           |
| 12 | RR     | Risk Ratio                                     |
| 13 | SAE    | Serious Adverse Event                          |
| 14 | SD     | Standard Deviation                             |
| 15 | SIMS   | Single-incision mini-slings                    |
| 16 | SMUS   | Standard mid-urethral slings                   |
| 17 | SOP    | Standard Operating Procedures                  |
| 18 | SUI    | Stress urinary incontinence                    |
| 19 | SUSAR  | Suspected Unexpected Serious Adverse Reaction  |
| 20 | TO-TVT | Transobturator tension-free vaginal tape       |
| 21 | TSC    | Trial Steering Committee                       |
| 22 | TVT    | Tension free vaginal tape                      |
| 23 | TVT-O  | Tension free vaginal tape – Obturator          |
| 24 | UI     | Urinary incontinence                           |
| 25 | UK     | United Kingdom                                 |
| 26 | UKCRC  | United Kingdom Clinical Research Collaboration |
| 27 | UoA    | University of Aberdeen                         |
| 28 | UPS    | Urgency perception scale                       |
| 29 | VD     | Voiding Dysfunction                            |
| 30 | WMD    | Weighted means difference                      |
| 31 | WTP    | Willingness to pay                             |
| 32 |        |                                                |
| 33 |        |                                                |
| 34 |        |                                                |
| 35 |        |                                                |
| 36 |        |                                                |
| 37 |        |                                                |
| 38 |        |                                                |
| 39 |        |                                                |
| 40 |        |                                                |
| 41 |        |                                                |
| 42 |        |                                                |
| 43 |        |                                                |
| 44 |        |                                                |
| 45 |        |                                                |
| 46 |        |                                                |
| 47 |        |                                                |
| 48 |        |                                                |
| 49 |        |                                                |
| 50 |        |                                                |
| 51 |        |                                                |
| 52 |        |                                                |
| 53 |        |                                                |
| 54 |        |                                                |
| 55 |        |                                                |
| 56 |        |                                                |
| 57 |        |                                                |
| 58 |        |                                                |
| 59 |        |                                                |
| 60 |        |                                                |



## INTRODUCTION

### 1.1. Background

Urinary incontinence (UI) is a common and distressing condition for women particularly over the age of 40 years.<sup>1</sup> In the UK, it is estimated that 6 million (40%) of this age group have clinically significant UI symptoms, 1 million (6.2%) are bothered by symptoms and 0.33 million (2.2%) find them socially disabling.<sup>2</sup> UI has a negative impact on a woman's social, physical and psychological wellbeing; leading to embarrassment, low self-esteem and social isolation. UI is associated with negative effects on the productivity of working women, with some avoiding employment because of fear of embarrassing situations.<sup>3</sup> UI has significant cost implications to the individual and the health service. The total annual cost to the UK NHS for the management of women over the age of 40 with UI was £301 million or 0.3% of the NHS budget.<sup>4</sup> Costs borne by women in terms of out of pocket expenses were £230 million<sup>5</sup> or £290 per woman per year.<sup>6</sup> All values reported are inflated to 2009 values. It is therefore clear that UI in women is a major issue for the NHS and for society, with the number affected and cost of treatment posing a significant burden for healthcare both now, and in the future with an ageing population.

SUI is the most common type of UI in premenopausal women, accounting for almost 50% of cases.<sup>7</sup> It is defined as involuntary leakage of urine on effort, or exertion, or on sneezing or coughing. Initial management of SUI includes conservative therapy such as pelvic floor muscle training (PFMT), biofeedback, electrical stimulation or drugs. When conservative therapy fails, in about one third of cases, surgery is the next option.<sup>7</sup> Of the surgical treatments available, tension-free standard mid urethral slings (SMUS; RP-TVT & TO-TVT) are the most commonly performed procedures for SUI resulting in 11,000 finished consultant episodes in England in 2009-10, with estimated costs of £2,044/procedure<sup>8</sup> i.e. a total of £22.5 million/year. The Cochrane review of minimally invasive MUS<sup>9</sup> concluded that there was no evidence of significant differences in patient-reported outcomes between RP-TVT & TO-TVT and therefore the control arm for the proposed RCT is a pragmatic combination of these 2 types of SMUS. Analysis of BSUG database showed that the vast majority of SMUS in UK are done under GA or deep intra-venous patient sedation.<sup>10</sup>

SIMS represent the 3<sup>rd</sup> generation of mid urethral slings (MUS); they have been developed with the aim to offer a true ambulatory procedure for treatment of SUI with reduced morbidity, earlier recovery while maintaining similar efficacy to SMUS. NICE undertook an Interventional Procedure overview of SIMS<sup>1</sup> for the management of SUI in women in July 2007 (NICE guidance/ IP398): there was no RCT evidence and only small case series data were available. The report concluded that the current evidence on the safety and efficacy of SIMS was inadequate in quality and quantity, and recommended that SIMS should only be performed in the context of research. Similarly, the Cochrane review of minimally invasive MUS found no randomised evidence evaluating SIMS.<sup>9</sup>

### 1.2. Rationale for the study

The European guidelines<sup>11</sup> on the management of urinary incontinence describe two concepts of MUS for the surgical treatment of SUI in women: (1) Tension-free MUS that include all MUS that depend on their post-insertion fixation mechanism on friction to nearby tissues within their relatively long trajectory of insertion such as SMUS (both RP-TVT and TO-TVT); one type of non-anchored SIMS (Contasure-Needleless) also fits into this group. (2) Anchored MUS that include all other SIMS and other anchored slings such as Remeex TRT; the latter is mainly used in women with recurrent SUI.<sup>12,13</sup> SIMS fundamentally differs from SMUS because they have a shorter trajectory of insertion and therefore need a robust anchoring mechanism to the obturator complex with a strong post-insertion pull-out force. All currently available SIMS share the same tape material (type 1 polypropylene) and the insertion technique through a single vaginal incision; however, they differ in the type/robustness of the anchorage mechanism used.<sup>14,15</sup> A number of recently developed

1 SIMS, such as Ajust, Altis, and TFS, have an added advantage that allow post-anchorage  
2 adjustment of the sling tension and have been shown in independent animal studies,  
3 assessing their immediate and delayed extraction forces, to be associated with the  
4 strongest and most robust anchoring mechanism to the obturator complex.<sup>14,15</sup>

5  
6 A multicentre prospective cohort study of adjustable anchored SIMS- Ajust<sup>®</sup> in 100 women  
7 has shown its acceptability (75%) and feasibility (97%) to be done under local anaesthesia  
8 (LA).<sup>16</sup> We recently concluded our multicentre prospective pilot RCT<sup>17</sup> where 137 women  
9 were randomised to adjustable anchored SIMS-Ajust<sup>®</sup> (n=69), performed under LA, vs.  
10 SMUS (TVT- O<sup>TM</sup>; n=68). At a minimum of 12 months follow-up (FU); there were no  
11 significant differences in the patient-reported success rate (OR 0.895; 95% CI 0.344,  
12 2.330; p= 1.000), objectives success rate (OR 0.929; 95%CI 0.382, 2.258; p=1.00) and  
13 re-operation rates (OR 0.591; 95% CI 0.136, 2.576; p=0.721) between both groups.  
14 Comparable number of women reported significant improvement in their QOL (quality of  
15 life) (p=0.190) and sexual function (p=0.699) in both groups. Similar results were  
16 recently reached by a Deutsch group in similar small RCT, Similarly, a number of  
17 observational studies assessing adjustable anchored SIMS, from various countries (UK,  
18 France, Italy, USA and Israel), with varying cohort sizes, and length of FU (6-12 month)  
19 have shown similar patient-reported and objective success rates of 85% - 91%.<sup>18-21</sup>

20  
21 A recent updated systematic review and meta-analysis<sup>22</sup> comparing the effectiveness and  
22 complications of SIMS versus SMUS for the surgical management of female SUI; included  
23 a total of 26 RCTs (n = 3308 women). The results showed that, after excluding RCTs  
24 evaluating TVT-Secur which was clinically irrelevant having been excluded from clinical  
25 practice, that there was no evidence of significant differences between SIMS and SMUS in  
26 patient-reported cure rates (risk ratio [RR]: 0.94; 95% confidence interval [CI], 0.88–1.00)  
27 and objective cure rates (RR: 0.98; 95% CI, 0.94–1.01) at a mean follow-up of 18.6  
28 months. These results pertained on comparing SIMS versus TO-TVT and RP-TVT  
29 separately. SIMS had significantly lower postoperative pain scores (weighted means  
30 difference [WMD]: -2.94; 95% CI, -4.16 to -1.73) and earlier return to normal activities and  
31 to work (WMD: -5.08; 95% CI, -9.59 to -0.56 and WMD: -7.20; 95% CI, -12.43 to -1.98,  
32 respectively). SIMS had a non-significant trend towards higher rates of repeat continence  
33 surgery (RR: 2.00; 95% CI, 0.93–4.31). The authors performed an exploratory subgroup  
34 analysis of four RCTs evaluating adjustable anchored SIMS (Ajust and TFS) versus TO-  
35 TVT and found no evidence of significant differences in patient- reported or objective cure  
36 rates. However, it is important to note that they found no RCTs evaluating Altis.<sup>22</sup> The  
37 authors concluded that on excluding TVT-Secur, there was no evidence of significant  
38 differences in patient-reported and objective cure between currently used SIMS and SMUS  
39 at midterm follow-up while associated with more favourable recovery time. The authors  
40 urged caution in interpretation of results due to the heterogeneity of the small trials  
41 included, lack of blinding of the assessors which can be source of bias, level of incomplete  
42 data leading to attrition bias, and the relatively short term of follow-up.

43  
44 Evidence of longer term outcomes for adjustable anchored SIMS are now emerging. In  
45 July 2012, Sivaslioglu et al,<sup>23</sup> reported the 5-year follow up for their RCT (n=80)  
46 comparing adjustable anchored SIMS-TFS<sup>®</sup> vs. SMUS. The results showed objective and  
47 patient-reported success rates of 83% & 89% in the SIMS-TFS<sup>®</sup> group compared to  
48 75% & 78% in the SMUS group; the difference was not statistically significant (p=0.16).  
49 Most recently, Naumann et al<sup>24</sup> reported their prospective observational study of 51  
50 women who underwent SIMS-Ajust<sup>®</sup> with 20-29 month follow- up; the patient-reported  
51 success rate was 86%.

52  
53  
54 The cost-effectiveness of any new technology is a pre-requisite for its adoption in clinical  
55 practice and therefore we have conducted the first health economic analysis of adjustable  
56 anchored SIMS - Ajust<sup>®</sup> versus SMUS-TVT-O<sup>TM</sup> <sup>25</sup> which was performed alongside our  
57 pilot RCT (n=137).<sup>17</sup> The health economic outcome measures were incremental costs to  
58  
59  
60

1 the health services, patient QALYs and incremental cost per QALY. Results have shown  
2 an incremental total cost savings to the health service of £142/procedure with adjustable  
3 anchored SIMS, not counting the further potential economic gain of earlier return to work  
4 in these women. There were no significant differences in QALYs generated compared to  
5 SMUS; 95%CI -0.008 to 0.002. Assuming these results were generalisable to all  
6 currently performed MUS procedures in England and Wales (approximately 11,000 in  
7 2010),<sup>10</sup> our analyses suggest the potential for substantial cost savings to the NHS in the  
8 UK of about £1.5 million per year. However, these results have to be confirmed in the  
9 definitive RCT.

10  
11 The above evidence has led to a consensus amongst urologists and urogynaecologists that  
12 an adequately powered RCT with clinical effectiveness as the primary end point is now  
13 timely and required to inform surgeons, patients and decision makers with the most  
14 clinically-effective, cost-effective surgical treatment for primary SUI, that is associated with  
15 the least burden on patients QoL and NHS resources.

### 16 17 18 **1.3 STUDY OBJECTIVES**

19 The aim of this pragmatic multicentre RCT is to determine the clinical effectiveness and  
20 cost-effectiveness of adjustable anchored Single Incision Mini-Slings (SIMS) compared  
21 to tension-free Standard Mid-urethral Slings (SMUS) in the surgical management of female  
22 stress urinary incontinence (SUI).

23  
24 The hypothesis being tested is that patient-reported success rate following surgical  
25 treatment with adjustable anchored SIMS procedures is non-inferior to tension-free SMUS  
26 while the former is associated with less post-operative pain, shorter hospital stay,  
27 earlier recovery and consequently earlier return to usual activities/ work and is more cost-  
28 effective than SMUS.

29  
30 The primary objective is to compare SUI outcomes in terms of patient-reported success  
31 rates as measured by the PGI-I at 12 months.

32  
33 The primary economic objective is to compare cost-effectiveness measured in terms of  
34 quality adjusted life years (QALYs) derived from responses to the EQ-5D and the ICIQ-  
35 LUTS qol) over the follow up period.

36  
37 The secondary objectives are to compare objective success rates (24 hour pad test/ home  
38 cough stress test), other patient-reported outcomes including: postoperative pain scores  
39 and health related QoL using the ICIQ-LUTSqol, impact on other urinary symptoms (ICIQ-  
40 FLUTS), impact on sexual function (ICIQ-FLUT- Sex/ PISQ-IR), complication rates,  
41 disease recurrence and costs to the NHS and patients.  
42  
43  
44  
45  
46  
47  
48  
49  
50  
51  
52  
53  
54  
55  
56  
57  
58  
59  
60

## 2. Methods:

### 2.1. Study Design

A pragmatic multicentre non-inferiority randomised controlled trial comparing adjustable anchored single-incision mini-slings (SIMS) with tension-free standard mid-urethral slings (SMUS) in surgical management of stress urinary incontinence (SUI) in women. The trial structure is presented below (Figure 1).

### 2.2. Intervention to be evaluated

The interventions being compared are: 1) tension-free standard mid-urethral slings (SMUS) including RP-TVT & TO-TVT and 2) adjustable anchored single-incision mini-slings (SIMS) which fulfil the following criteria of robust anchorage and post-insertion adjustability:

- SIMS is made of Type I polypropylene Mesh: mono-filament & macro-porous (pore size =75 µm);
- Robustly anchored to Obturator Complex (Robust insertion is defined as: Immediate pull-out force = 12 Newtons (N) and/ or four weeks pull out force = 30N);
- Fully adjustable sling post insertion
- Proven feasibility to be done under local anaesthetic (LA);
- Minimum of level 2 evidence showing their safety and short term (minimum 3-month) patient reported outcomes.

SMUS will be performed under general anaesthetic (GA) or deep intravenous sedation while adjustable anchored SIMS will be done under local anaesthetic (LA) as an opt-out policy (i.e. LA will be the standard type of anaesthesia for adjustable anchored SIMS unless specifically declined by a participant requesting GA). Furthermore, participant's requests for conversion to GA will be respected at any stage of the procedure. A standard LA protocol, which we have previously published and successfully used in two previous studies<sup>16,17</sup> will be used as a guidance (Appendix 1).

All participants, in both arms, will receive pre-operative analgesia (30-60 minutes prior to the operation): Paracetamol and Non-steroidal anti-inflammatory drug NSAID (Diclofenac Sodium or Ibuprofen); a vaginal application of EMLA cream (a 5% emulsion preparation, containing 2.5% each of lidocaine/prilocaine) and optional 10ml of intra-urethral Instillagel (anaesthetic, antiseptic lubricant). All participants would receive preoperative/ intra-operative prophylactic broad spectrum antibiotics. A cystoscopy (rigid or flexible) will be performed in all women following insertion of the sling, regardless of the study arm. It is worth noting that rigid cystoscopy was well tolerated by all women under LA in the pilot RCT. No vaginal packs or catheters would be routinely inserted. Postoperatively all participants will undergo voiding assessment including assessment for post-voiding residual urine volume (PVR) using a bedside bladder-scanner (Appendix 2, guidance protocol & flowchart for postoperative voiding assessment).

#### 2.1.1 Adjustable anchored single-incision mini-slings (SIMS)

A standard combination of fast and delayed action LA (dose dependant on participant's body weight) will be infiltrated vaginally into either side of the urethra, the vaginal angles (sulci) and behind the inferior pubic ramus into the obturator complex (e.g. using a curved black spinal needle and/or pudendal block needle). Women will be accompanied by a nurse for support. All participating surgeons will use an adjustable anchored SIMS that meet the pre-specified criteria described below. A standardised insertion technique will be used by all surgeons following the original description of the particular SIMS used. Most adjustable anchored SIMS, however, have a fairly similar procedure of insertion. We describe below the standard insertion steps for the adjustable anchored SIMS (Ajust<sup>®</sup>-CR Bard and Altis<sup>®</sup>-Coloplast): women will be positioned in Lithotomy position with hips flexed at 90-100 degree. LA

1 infiltration as above; a sub-urethral vertical vaginal incision (~1.5 cm) will be made;  
2 bilateral para-urethral tunnels created reaching to the posterior margin of the inferior  
3 pubic ramus but without piercing the obturator membrane. Further infiltration of LA into the  
4 obturator membrane; SIMS, with the 'fixed anchor' end mounted on the applicator, would  
5 be introduced through the pre-dissected para-urethral tunnel until reaching behind the  
6 inferior pubic ramus. The applicator would then pivot slowly behind the ramus and  
7 through the obturator complex allowing the fixed anchor to maintain its position in the  
8 obturator membrane and muscles at points equivalent to 10 & 2 O'clock in relation to the  
9 urethral orifice. The insertion steps would be repeated on to the other side allowing the  
10 'adjustable anchor' to be fixed in the contra-lateral obturator complex. The SIMS is now  
11 robustly anchored and the tension would then be adjusted as required to achieve  
12 continence whilst avoiding voiding difficulty. Performing the cough stress test can prove  
13 very helpful in this adjustment process and is recommended. The adjustable anchor  
14 would then be locked in case of the Ajust (not required with Altis), a cystoscopy will be  
15 performed to exclude perforation and the vaginal incision closed.

### 16 **2.1.2 Standard tension-free mid-urethral slings (SMUS):**

17 The choice of SMUS whether retropubic or transobturator will depend on surgeons'  
18 experience. We expect a 50% representation of each type of SMUS in the control arm.  
19

### 20 **2.1.3 Retropubic Tension Free Vaginal Tape (RP-TVT):**

21 RP-TVT will be Type-1 polypropylene Mesh (mono-filament and macro-porous - pore size  
22  $\geq 75$   $\mu\text{m}$ ). The Tension Free Vaginal Tape (TVT<sup>®</sup>) procedure was developed by Ulmsten  
23 and Petros.<sup>26</sup> The procedure will be done under GA or intravenous sedation as per the  
24 standard practice of each surgeon. The bladder will be emptied with a Foley catheter.  
25 Close to the superior rim of the pubic bone, two 1-cm long transverse incisions 3cm either  
26 side of the midline will be made after injection of LA into the abdominal skin just above the  
27 symphysis pubis, down along the back of the pubic bone to the retropubic space and  
28 vaginally into the peri-urethral area. An incision ~1.5 cm long will be made in the midline of  
29 the suburethral vaginal wall; followed by dissection of the peri-urethral tunnels to allow  
30 introduction of the TVT<sup>®</sup> needle. A stent will be inserted into the Foley catheter to deviate  
31 the urethra-vesical junction away from the path of the needle. The TVT<sup>®</sup> needle perforates  
32 the urogenital diaphragm and will be brought up to the abdominal incision 'shaving' the  
33 back of the pubic bone. The procedure will then be repeated on the other side, and a  
34 cystoscopy will be performed to exclude perforation. The cough stress test may then be  
35 performed, according to surgeon's standard technique, and the sling adjusted in a tension-  
36 free fashion and the incisions are closed.  
37

### 38 **2.1.4 Transobturator Tension Free Vaginal Tape (TO-TVT):**

39 TO-TVT will be Type-1 polypropylene Mesh (mono-filament and macro-porous - pore size  
40  $\geq 75$   $\mu\text{m}$ ). All procedures will be performed under GA as originally described by Delrome<sup>27</sup>  
41 and de-Leval<sup>28</sup> for the outside-in and inside-out routes respectively. Women are  
42 positioned in Lithotomy position with hips flexed at 100-110 degrees and LA may be  
43 infiltrated into the vaginal angles; the latter is not a standard practice however is  
44 recommended in a similar regime to the one used in the adjustable SIMS insertion  
45 (above). ~1.5 cm sub-urethral longitudinal vaginal incision will be made and bilateral para-  
46 urethral tunnels created reaching to the posterior margin of the inferior pubic ramus.  
47 Bilateral groin incisions are made 1-2cm lateral to the labio-femoral fold and 2 cm above  
48 level of urethra. The transobturator trocar is inserted from groin incisions at 90  
49 degree to pierce the obturator muscles and membranes and then guided by the  
50 surgeon's finger to the vaginal incision. TO-TVT is then mounted on the trocar and the  
51 trocar is withdrawn in reverse order. The previous 2 steps are repeated on the contra-  
52 lateral side achieving TO-TVT sub-urethral placement and the TO-TVT is then adjusted  
53 tension-free. For the inside-out technique of insertion, TO-TVT would be introduced in the  
54 reverse route from the vaginal incision towards the groin using the winged guide to protect  
55  
56  
57  
58  
59  
60

1 the lower urinary tract (LUT). A cystoscopy will be performed to exclude LUT injury.  
2 Vaginal and skin incisions will then be closed.

### 3 **2.3. Study population**

4 Women aged 18 years or over with SUI who have been referred to the collaborating  
5 surgical gynaecology, urology and urogynaecology units from across the UK for treatment  
6 of SUI for whom surgery has been indicated.  
7

8 Setting: Secondary and tertiary care acute hospital settings across the UK. NHS Grampian  
9 will be the clinical co-ordinating centre and house the Chief Investigator (CI).  
10

11 Each unit will have at least one participating surgeon who is competent in performing  
12 SIMS under LA prior to enrolling in the RCT. Ideally, the surgeon will have performed 20  
13 adjustable anchored SIMS procedures (with 10 performed under LA); within prospective  
14 audit and results submitted to a national surgical database. The CI, or a delegated expert in  
15 SIMS, will provide training in SIMS under LA for enrolling surgeons as necessary and will  
16 ensure adequate expertise of surgeons in both arms. Surgeons will be experienced in at  
17 least one type of SMUS (RP-TVT or TO-TVT) and will have performed an adequate  
18 workload in the preceding 2 years.  
19

#### 20 **2.3.1. Selection of participants**

21 As standard practice, clinicians will assess patients likely to require surgery for SUI. A log  
22 will be taken of all potentially eligible patients assessed in order to document the reasons  
23 for non-inclusion in the study (e.g. reason they were ineligible, or declined to participate) to  
24 inform the CONSORT diagram.  
25

26 Brief details of potentially eligible patients will be recorded in the screening logs at each site  
27 (these will be an aid to monitoring potential participant inclusion).  
28

#### 29 **2.3.2. Planned inclusion and exclusion criteria**

##### 30 **Inclusion criteria:**

31 Women aged 18 years or over with SUI, who have been referred to one of the collaborating  
32 units from across the UK, and for whom surgery has been indicated. Women will have  
33 completed their families, failed or declined conservative treatment (supervised pelvic floor  
34 muscle training - PFMT). All women will have urodynamic stress incontinence, or  
35 urodynamic mixed urinary incontinence with predominant SUI bothering symptoms. The  
36 small group of women with pure symptoms & signs of SUI **and** no symptoms of overactive  
37 bladder (OAB) or voiding dysfunction (VD) can be included without urodynamic  
38 investigations as per the updated NICE guidelines.  
39

40 Pre-operative urodynamic investigations include: free uroflowmetry, post-voiding residual  
41 urine volume assessment and subtracted filling cystometry. Other tests such as Urethral  
42 pressure profile and Leak point pressure pressures are not mandatory however are  
43 welcome as they will inform a number of the pre-planned secondary outcomes.  
44

##### 45 **Exclusion criteria:**

46 Women will be excluded if they have one or more of the following:  
47

- 48 • Anterior or Apical Prolapse  $\geq$  POP-Q Stage 2 (POP-Q = pelvic organ prolapse  
49 quantification score)
- 50 • Previous incontinence surgery (for SUI)
- 51 • Mixed incontinence with pre-dominant OAB symptoms (defined as OAB failed to be  
52 controlled on conservative treatment such as Bladder retraining, PFMT and/or anti-  
53 muscarinic treatment)
- 54 • Neurological conditions e.g. MS, spinal cord injuries.
- 55 • Concomitant surgery at time of SUI surgery.  
56  
57  
58  
59  
60

- Previous Pelvic irradiation
- Pregnancy or planning for a family.
- Inability to understand the information leaflet and consent form in English

## 2.4. Recruitment and Study Procedures

### 2.4.1. Identifying participants

Local procedures at the participating hospitals are different and the timing and mode of approach to patients and the consent process will vary to accommodate both the variability at the sites and the needs of the patients. Where possible, the Patient Information Sheet will be sent to patients together with their clinic appointments ensuring that they have ample time (>24 hours) for consideration before being approached by the research team at the clinic.

Patients likely to require surgery for SUI and who meet the eligibility criteria will be identified at the pre-assessment clinics, urodynamic clinics and outpatient urology/gynaecology clinics by the consultant, research nurse (RN) or a designated team member. The consultant/ research nurse (RN) will introduce the study to the patient and provide her with the Patient Information Sheet as appropriate; answer any queries and if appropriate the participant may sign the consent form; receive the baseline assessment pack for completion at home and bring back on the day of surgery or send back to the site using pre-paid post.

Patients whose first approach is at the clinic will be given as much time as they require to consider participation; patients may make a decision to participate at this time or may agree to be contacted at home by the local RN. If a patient agrees to be contacted at home she will receive a telephone call from the local RN to discuss any queries. If a patient agrees to the study at that stage, then arrangements will be made for baseline assessment and consenting; this could be done as a separate appointment or at a pre-admission clinic. As above, participants can complete the baseline assessment pack at home and bring back on the day of surgery or send back to the site using pre-paid post. These arrangements can be individualised for each centre.

### 2.4.2. Informed consent

The patient information leaflet explains that the trial is investigating the use of either adjustable single-incision mini-slings (SIMS) or standard tension-free mid-urethral slings (SMUS) for the surgical management of stress urinary incontinence (SUI) in women. Signed informed consent forms will be obtained from the participants in all centres. Participants who cannot give informed consent (e.g. due to incapacity) will be not be eligible for participation. The participant's permission will be sought to inform their general practitioner that they are taking part in this trial.

### 2.4.3. Randomisation and allocation

Eligible and consenting participants will be randomised to one of the two study groups in a 1:1 allocation ratio using the randomisation application at the trial office at CHaRT. This randomisation application will be available 24 hours a day, 7 days a week as both an Interactive Voice Response (IVR) telephone system and as an internet based application. The randomisation will use a minimisation algorithm based on centre and previous supervised Pelvic Floor Muscle Training within the last two years [PFMT: Yes/No]. Women will be further randomised to receive short versus detailed sexual function questionnaire.

### 2.4.4. Follow-up procedures

Eligible patients that have given signed informed consent to participate in the study will be randomised to either SIMS or SMUS. They will be asked, at baseline, to complete the pre-operative questionnaire pack which includes few questions on participants' demographic details and pre-operative health/ medications. It also includes validated questionnaires for symptom severity of UI and its impact on quality of life (QoL) and sexual function: the EQ-

5D; ICIQ-SF; Urgency perception scale (UPS); ICIQ-LUTSqol; ICIQ-FLUTS; ICIQ-FLUTSsex (or PISQ-IR); and to perform 24-hours pad test and home continence stress test (see Appendix 3 Objective Assessment of Urinary Incontinence Within the SIMS Trial - Protocol).

At day 1 to day 14 they will be asked to complete the pain score and use of analgesics questions by self-completed post-operative diary. At 4 weeks post-operative participants will be asked to complete a short questionnaire (on the last section of the diary) to capture pain, use of analgesia, complications, return to work/ normal activities, PGI-I and EQ-5D. At 3 months post-operative, participants will be asked to complete a number of questionnaires: to measure the PGI-I; EQ-5D; ICIQ-SF; UPS; questions related to health services resource; and to report any complications or further treatment received for UI. In addition, at 12, 24 and 36 months post-randomisation, participants will be asked to complete a questionnaire to measure the PGI-I, recurrence, further treatment received and questions related to health services resource use, in-addition to all baseline assessment pack. Taking into account the inevitable waiting time between randomisation and receiving the surgical treatment (average surgical waiting list is 8-12weeks) and in-addition the clinical importance of assessing the outcomes at 12 month postoperative, we aim to send the 1 year follow-up pack at 15 month post-randomisation. This strategy will ensure that the vast majority of participants are at least 12 month post-operative at time of capturing the primary outcome. In-addition, at 20 months participants will be asked to fill out an additional economic data questionnaire, which will include the patient time and travel costs questionnaire. Sending this questionnaire at 20 months will minimise patient burden when completing the annual questionnaire. The discrete choice experiment (DCE) will be completed at the end of the 3 year follow-up period.

Questionnaires and up to two reminders will be sent to participants by post. Non-responders to the 12m post-randomisation questionnaire will be contacted by phone for a short interview to capture the primary outcome (PGI-I; a single item question to mark the outcome of the operation as described in section 5.1). If the participant indicates at this phone call her wish to withdraw from the study a "Change of Status Form" will be completed as below. Participants will be sent a voucher (of modest value) as a token of appreciation for completion and return of the 3 month and follow-up questionnaires.

#### **2.4.5. Change of Status/Withdrawal procedures**

Participants will remain on the trial unless they choose to withdraw consent or if they are unable to continue for a clinical reason. If a participant withdraws consent, participant questionnaires will not be collected. A member of the research team will contact the participant by phone and complete the "change of status form" which includes the participant's instructions on what parts, or whole, of the study they may wish to withdraw from. Unless a participant specifically declines the research team will continue to collect relevant data from their health care records such as ONS and NHS central registries. All other changes in status with the exception of formal withdrawal of consent will mean the participant is still followed up for all study outcomes wherever possible.

#### **2.4.6. Subsequent arrangements (if applicable)**

##### **Informing key people**

Following formal trial entry:

The Study Office will:

- i) Inform the participant's General Practitioner (by letter enclosing information about SIMS and Study Office contact details).

The local Research Nurse will:

- i) File the Hospital Copy of the Consent form in the hospital notes along with information about SIMS; give one copy to the patient; file one copy to the local site file and send one copy to the Study Office in Aberdeen.



- 1 ii) Use the SIMS internet database to enter data regarding the participant, including
- 2 data required to complete randomisation
- 3 iii) Data entry onto the study database as soon as practical.
- 4 iv) Forward a copy of study documentation when and as requested by the Study
- 5 Office in Aberdeen to facilitate quality control.
- 6

### 7 **Notification of/by GPs**

8 GPs are asked to contact the Study Office if one of the participants moves, becomes too ill  
9 to continue or dies, or any other notifiable event or possible serious adverse event occurs.  
10 Alternatively, staff at the Study Office may contact the GP.  
11

## 12 **2.5. SAFETY**

13 The SIMS trial involves procedures for the surgical management of SUI in women which  
14 are well established in clinical practice. Adverse effects may occur during or after any  
15 type of surgery.  
16

### 17 **2.5.1. Definitions**

18 An **adverse event** (AE) is any untoward medical event affecting a clinical trial participant.  
19 Each initial AE will be considered for severity, causality or expectedness and may be  
20 reclassified as a serious event.  
21

22 Adverse events are not:

- 23 • Continuous and persistent disease or symptom, present before the trial, which fails  
24 to improve; such as urgency, urgency incontinence, voiding dysfunction, pain or  
25 dyspareunia
- 26 • Treatment failure: persistence or recurrence of urinary incontinence.  
27

28 Worsening pain or where the site of pain changes is an adverse event.  
29

30 A **serious adverse event** (SAE) is any AE, that:

- 31 • results in death;
- 32 • is life threatening (i.e. the participant was at risk of death at the time of the event; it  
33 does not refer to an event which hypothetically might have caused death if it was  
34 more severe);
- 35 • results in persistent or significant disability or incapacity;
- 36 • requires an un-planned re-admission to the hospital (defined as "participant admitted  
37 as an in-patient with  $\geq 1$  night hospital stay"). This excludes hospital ward attenders  
38 for minor issues such as lower UTI, voiding difficulties or other issues considered by  
39 the PI to be minor. This information will be routinely collected on the postoperative  
40 form and/ or the Supplementary hospital visit form as appropriate.
- 41 • requires prolongation of existing hospitalisation (defined as >36 hours postoperative  
42 hospital stay). This excludes prolongation of hospital stay for minor issues such as  
43 voiding difficulties; such information will be routinely collected on the Operation and  
44 clinical data form. Prolongation of hospital stay due to social/ geographical reasons  
45 will not be considered.
- 46 • Is otherwise considered medically significant by the investigator  
47

48 *Note: Hospitalisations for treatment planned prior to randomisation and hospitalisation for*  
49 *elective treatment of a pre-existing condition, or complication arising from either, will not be*  
50 *considered as an (S)AE.*  
51  
52

**Specific expected adverse events:**

In this surgical trial the following events are potentially expected:

Intra-operative complications: Bleeding, bladder/urethral injury, bowel injury, nerve injury (obturator/ dorsal nerve of clitoris), injury to blood vessels, hypersensitivity to the local/ general anaesthetics and/ or any of the medications or materials used; pain; shaking/ dizziness, change of procedure or device and / or type of anaesthesia.

Immediate Postoperative complications: Pain in the hip/ thigh/ or the vagina, Infection (chest, urinary tract), bleeding, fever, haematuria, syncope, dizziness, voiding difficulties/ urinary retention and thromboembolism.

Later Postoperative complications: Pain in the hip/ thigh/ or the vagina, mesh extrusion, mesh erosion to the vagina or lower urinary tract, haematoma, abscess formation and nerve injury. In-addition, new onset or worsening of any of the following: dyspareunia, vaginal discharge, voiding difficulties/ urinary retention, long-term self-catheterisation, urgency/ urgency incontinence.

**2.5.2 Procedures for detecting, recording, evaluating & reporting AEs, SAEs****2.5.2.1 Detecting AEs and SAEs**

All AEs and SAEs must be recorded from the time a participant consents to join the study until follow-up is complete.

Follow-up questionnaires will enquire about any AE/SAE occurrence; in-addition, participants will also be asked if they have been admitted to hospital and/or seen a healthcare professional.

**2.5.3 Recording AEs and SAEs**

Depending on severity, when an AE/SAE occurs, it is the responsibility of the Investigator (or delegated medical personnel) to review appropriate documentation (e.g. hospital notes, laboratory and diagnostic reports) related to the event. The Investigator (or the delegated medical personnel) should then record all relevant information in the CRF and if required on the SAE form.

Information on SAE to be collected includes type and date of event, Investigator assessment of severity and causality and any investigation/ treatment required.

Planned hospital visits for conditions other than those associated with urinary incontinence and/ or its treatment will not be collected or reported. Further UI treatment will be recorded as a secondary outcome measure, but will not be reported as serious adverse events.

**2.5.4 Evaluating AEs and SAEs**

All adverse events will be assessed in respect of seriousness, relationship to study intervention, whether expected or unexpected, and therefore, whether constituting a Serious Adverse Event (SAE) by the local PI, CI or their deputies.

**Assessment of Seriousness**

The Investigator should make an assessment of seriousness as defined in Section 4.1.

**Assessment of Causality**

The Investigator must make an assessment of whether the AE/SAE is likely to be related to any of the research procedures according to the following definitions:

- **Related:** resulted from any of the procedures required by the protocol, whether or not this procedure is the specific intervention under investigation and whether or not it would have been administered outside the study as normal care.

- 1 - **Unrelated:** where an event is not considered to be related to any of the research  
2 procedures.  
3

### 4 **Assessment of Severity**

5 The Investigator should make an assessment of severity for each AE/SAE and complete a  
6 SAE form should any of the SAE criteria in 4.1 be met.  
7

### 8 **Assessment of Expectedness**

9 When assessing expectedness refer to the expected events (Section 4.1)

10 An example for the assessment of an AE; Intra-operative bleeding will be collected as an  
11 AE on the operative form, however if >500mls a SAE form will be completed.  
12

### 13 **2.5.5 Reporting AEs and SAEs**

#### 14 **Reporting responsibilities of the CI**

15 When an SAE form is uploaded onto the trial website, the Trial Manager and CI will be  
16 automatically notified. The CI or Trial Manager will notify the sponsor within 24 hours of  
17 receiving completed forms for “un-expected” and 7 days of receiving completed forms for  
18 an “expected” SAE. The sponsor will then provide the final assessment of the SAE.  
19

20 The CI (or Trial Manager) will report any “related *and* unexpected SAEs” to the main REC  
21 and the DMC within 15 days of the CI becoming aware of it. All other SAEs will be  
22 summarised and reported to the Ethics Committee, the Funder, the DMC and the Trial  
23 Steering Committee in their regular progress reports.  
24

25 If all the required information is not available at the time of reporting, the Investigator must  
26 ensure that any missing information is provided as soon as this becomes available. It  
27 should be indicated on the report that this information is follow-up information of a  
28 previously reported event.  
29

### 30 **2.6. OUTCOME MEASURES**

31 This RCT will assess and compare adjustable anchored SIMS vs. tension-free SMUS in  
32 respect of: patient-reported success rates; objective success rates; impact on urinary  
33 symptoms, complications, recovery, health-related QoL and sexual function; costs to health  
34 services up to 3 years follow-up. We will use the same assessment tools and QoL  
35 instruments were used in our pilot RCT which observed a 97% response rate.  
36

#### 37 **2.6.1. Primary outcome measure**

38 The primary outcome measure will be patient-reported success rate measured by the  
39 validated PGI-I at 12-months. Patient-reported success rates reflect patients’ experience  
40 compared to the objective measures, which can overestimate the success of SUI surgery.<sup>27</sup>  
41 The primary outcome is assessed by the PGI-I: a 1-item questionnaire designed to assess  
42 the patient’s impression of changes in her urinary symptoms. The PGI-I asks the patient to  
43 best describe her urinary symptoms, compared with how they were before the study  
44 intervention, on a 7-point scale scored as: (1) “very much better,” (2) “much better,” (3) “a  
45 little better,” (4) “no change,” (5) “a little worse,” (6) “much worse,” or (7) “very much worse.”  
46 ‘Success’ will be defined as responses of ‘very much better’ or ‘much better’; this will  
47 determine whether the women are satisfied with their operation and hence consider their  
48 symptoms are resolved and not seek further treatments. The primary economic outcome  
49 will be incremental cost per QALY gained at 12-months. The above measures will also be  
50 assessed at 2 and 3 years.  
51  
52  
53  
54  
55  
56  
57  
58  
59  
60

## 2.6.2. Secondary outcome measures

- 2.6.2.1 Complications including: lower urinary tract injuries; haemorrhage (blood loss  $\geq$  200mls); post-operative voiding dysfunction; pain, mesh extrusion/erosion, dyspareunia, long-term self-catheterisation, new-onset or worsening urgency/ urgency incontinence.; assessed as appropriate at 3 and 12 months then yearly up-to 3 years
- 2.6.2.2 Post-operative pain using a pain Numerical Rating Scale (NRS): assessed day 1-14.
- 2.6.2.3 Objective success rates: assessed by 24 hour pad test at 12 months and yearly up to 3 years.
- 2.6.2.4 Other lower urinary tract symptoms using the International Consultation on Incontinence Questionnaire - Female Lower Urinary Tract Symptoms long form (ICIQ-FLUTS) and/or short form (ICIQ-SF) at 3and 12-months and yearly up to 3 years.
- 2.6.2.5 Health-related QoL profile (area under the curve) derived from EQ-5D, pain scores and ICIQ-LUTSqol measurements at 1,3 and 12-months and yearly up to 3 years
- 2.6.2.6 Impact on sexual function derived from ICIQ-FLUTsex/ or PISQ-IR measurements at; 12-months and yearly up to 3 years.
- 2.6.2.7 Recurrence of SUI, re-operation rates for SUI, further treatment received such as physiotherapy, medical treatment (Selective Nor-adrenaline Re-uptake Inhibitors and/ or Anti-muscarinic treatment).
- 2.6.2.8 Secondary economic outcomes include;
- NHS and patient primary and secondary care resource use and costs at 12-months and yearly up to 3 years.
  - Incremental cost-effectiveness derived from responses to the ICIQ-LUTS over the follow-up period at 12-months and yearly up to 3 years.
  - Incremental net benefit (NB) calculated from the responses to the discrete choice experiment (DCE) at end of the 3yr follow-up.

## 2.7. DATA COLLECTION AND PROCESSING

### 2.7.1. Measuring outcomes

Participant follow-up questionnaires will be triggered by date of surgery up-to 3months then by date of randomisation thereafter.

### 2.7.2. Schedule of data collection

The components of follow-up are shown in the table 1 below:

**Table 1 Source and timing of measures**

|                                | Baseline | Surgery details | Day 1-14 | 4-weeks | 3-months | 12-months* | 20-months | Year 2 | Year 3 |
|--------------------------------|----------|-----------------|----------|---------|----------|------------|-----------|--------|--------|
| Clinical/surgery details       | ○        | ○               |          |         |          |            |           |        |        |
| Pain NRS/ Daily Text messaging |          |                 | ●        | ●       |          |            |           |        |        |
| Recovery                       |          |                 |          | ●       | ●        |            |           |        |        |
| PGI-I                          |          |                 |          | ●       | ●        | ●          |           | ●      | ●      |
| EQ-5D                          | ○        |                 |          | ●       | ●        | ●          |           | ●      | ●      |
| ICIQ-LUTSqol                   | ○        |                 |          |         | ●        | ●          |           | ●      | ●      |
| ICIQ-FLUTS                     | ○        |                 |          |         |          | ●          |           | ●      | ●      |
| ICIQ-SF & UPS                  | ○        |                 |          |         | ●        | ●          |           | ●      | ●      |
| ICIQFLUT-Sex/ or PISQ-IR       | ○        |                 |          |         |          | ●          |           | ●      | ●      |
| 24-hours pad test              | ○        |                 |          |         |          | ●          |           | ●      | ●      |
| Home continence                | ○        |                 |          |         |          | ●          |           | ●      | ●      |

|                                                                             |  |  |  |  |   |   |   |   |   |
|-----------------------------------------------------------------------------|--|--|--|--|---|---|---|---|---|
| stress test                                                                 |  |  |  |  |   |   |   |   |   |
| Health care resource utilisation/complications/recurrence/further treatment |  |  |  |  | • | • |   | • | • |
| Time & travel questionnaire                                                 |  |  |  |  |   |   | • |   |   |
| DCE,                                                                        |  |  |  |  |   |   |   |   | • |

○ Clinic/Hospital    • Out-with clinic (e.g. post, email, phone, etc)

\* Taking into account the inevitable waiting time between randomisation and receiving the surgical treatment (average surgical waiting list is 8-12weeks) and in-addition the clinical importance of assessing the outcomes at 12 month postoperative, we aim to send the 1 year follow-up pack at 15 month post-randomisation. This strategy will ensure that the vast majority of participants are at least 12 month post-operative at time of capturing the primary outcome.

**2.7.3. Data processing**

Research Nurses will enter locally-collected data in the centres. Staff in the Study Office will work closely with local Research Nurses to ensure that the data are as complete and accurate as possible. Follow up questionnaires to participants will be sent from and returned to the Study Office in Aberdeen. Extensive range and consistency checks will further enhance the quality of the data.

**2.8. SAMPLE SIZE, PROPOSED RECRUITMENT RATE AND MILESTONES**

**2.8.1. Sample size**

A non-inferiority design is appropriate for this trial because the proportion having success at 12 months in women managed with SMUS is high. Adjustable anchored SIMS is not hypothesised to increase this proportion; however may have other potential benefits as outlined previously. It is therefore important to show that SIMS is clinically non-inferior to SMUS and to measure these other dimensions (such as cost-effectiveness, mediated through shorter stay and earlier recovery, QoL mediated through less pain, and any safety signals via the complication rate) in an adequately powered, pragmatic RCT with long enough follow up. It is essential therefore that the study is powered to demonstrate non-inferiority within an appropriate margin, and hence this clinical outcome is the correct choice as primary outcome. A 10% inferiority margin has been deemed by expert clinicians as the maximum inferiority margin in clinical effectiveness that would be accepted should SIMS prove to be superior in other outcomes such as shorter hospital stay, less postoperative pain, earlier recovery and more cost-effective. In such case, adjustable anchored SIMS would then reliably be able to be considered as a first line surgical treatment of women with primary SUI.

Published literature suggests that the P1, the percentage success rate at 12-months in the SMUS arm will be about 85%; identical results were confirmed by our pilot RCT. Estimating P2, the percentage of success in the adjustable anchored SIMS arm, is more difficult due to lack of published evidence; a crude meta-analysis of the 12 month outcome data from our multicentre pilot RCT and few other small studies indicates a similar P2 of 85%.

Power estimates were explored by simulating trials of fixed sample size (using equal allocation) with binary responses generated by P1 = 85% and P2 = 85%. Power was then estimated as the proportion of simulated trials where the lower bound of the 2-sided confidence interval satisfied P1-P2 > -10%. Simulations, run in Stata 11.2, show that a trial of 275 per arm or 550 in total is required for the lower bound of the estimated 95% confidence interval to rule inferiority at the specified level with 90% power. Adjustment for potential 15% drop-out inflates the trial to 650 in total. For comparison, a trial of this size would have above 80% power to test superiority on secondary outcomes of difference in

1 means of size one quarter of a standard deviation (or 90% power to detect an effect size of  
2 0.28 standard deviations).

3 In our multicentre pilot RCT,<sup>17</sup> 131/137 women (95.6%) completed the 12 month follow-up  
4 and showed no significant differences in the patient-reported success rate (OR 0.895;  
5 95%CI 0.344, 2.330; p=1.000) between adjustable anchored SIMS (Ajust<sup>®</sup>) vs. SMUS  
6 (TVT-O<sup>™</sup>) groups. These results, together with similar results from other studies detailed  
7 above<sup>16–21</sup> provide assurances for the reliability of our sample size calculations. A statistical  
8 reviewer previously queried whether we had considered the implications if in fact the  
9 success of the 2 procedures were not identical but slightly different. If we consider success  
10 rates of 84% and 85%, the study retains 90% power to detect a slightly larger margin of  
11 non-inferiority of around 11%, and so to all intents and purposes a sample size of 650  
12 remains adequate.  
13

## 14 2.8.2. Recruitment rates and milestones

15 Our recruitment rate estimates are based on data from the pilot multicentre RCT comparing  
16 adjustable anchored SIMS (Ajust<sup>®</sup>) with SMUS (TVT-O<sup>™</sup>). We believe that these centres  
17 are representative of the UK; 137 women were recruited across 6 centres at a rate of 3.4  
18 per centre per month. Overall, 137/181 (76%) patients were willing to be randomised;  
19 however we have used a more conservative estimate of 50% in our recruitment projection.  
20 Therefore, it has been estimated that in order to approach 1300 eligible patients to  
21 randomise the required 650 patients, 25 centres would need a throughput of at least 90  
22 eligible patients per centre per year to recruit 3 patients per month. The recruitment  
23 projection is based on 18 months of recruitment (months 7-24 inclusive) and allows for set-  
24 up, holidays and waiting list times. We expect a staggered recruitment of centres with all  
25 centres active by the end of Month 18. The first 45 patients will be recruited by Month 12,  
26 256 patients by Month 18 and the remaining 367 patients by Month 24 making a total of  
27 668 patients.  
28

29 Due to lower than predicted recruitment a further extension has been granted to enable  
30 recruitment to reach at least 600 participants. This increases the recruitment period so that  
31 last participant will be recruited in month 44.  
32

33 Please see the Gantt Chart (Figure 2) and Recruitment Projection (Appendix 4).  
34

## 35 3. ANALYSES PLAN

### 36 3.1. Statistical Analysis

37 Treatment groups will be described at baseline and follow-up using numbers (with  
38 percentages), means (with standard deviations) and medians (with inter-quartile ranges)  
39 where relevant. Primary and secondary outcomes will be compared using generalised  
40 linear models, with adjustment for design covariates. As standard we also adjust all our  
41 surgical RCTs for centre/surgeon effects; adjustment for centre/surgeon will be by random  
42 effect in the trial analysis.  
43

44 For the primary outcome, we plan to dichotomise the PGI-I responses with 'success'  
45 defined as 'very much better' or 'much better' and the rest of responses as failures; this will  
46 determine whether the women are satisfied with their operation and hence consider their  
47 symptoms are resolved and do not seek further treatments. In-addition, this definition of  
48 "success" is widely used within the research field of surgical treatment of SUI, and was  
49 used in our pilot RCT, and therefore will allow comparing our results to other trials in the  
50 literature. We will also perform a secondary analysis using ordinal regression on the 7-  
51 point PGI-I scale, so potentially using more of the information in the outcome. However, we  
52 do not propose adopting this ordinal regression as the primary analysis since the  
53 underlying proportional odds model makes strong assumptions about the consistency of  
54  
55  
56  
57  
58  
59  
60

1 treatment effect across the levels of response, and particularly in the context of a non-  
2 inferiority design there may be departures from those assumptions that would interfere with  
3 establishing whether the simple hypothesis around the (non-inferiority) of the binary  
4 'success' under the two operations had been shown.

5  
6 The statistical analysis of the primary outcome will be by the usual intention-to-treat (ITT)  
7 and also a suitably defined per protocol (PP) analysis (to reflect the unique nature of non-  
8 inferiority designs and the issue that ITT for such designs may not be the most  
9 conservative analysis and inflate the true type I error rate, given that in a non-inferiority  
10 design the null hypothesis is that the interventions are not non-inferior or equivalent). If the  
11 two approaches return material differences in interpretation this will be investigated  
12 carefully. Results will be displayed as estimates and 95% confidence intervals derived from  
13 appropriate generalised linear models. Confidence intervals around observed differences  
14 will then be compared to the pre-specified non-inferiority margin.

15  
16 Secondary outcomes will be analysed similarly. Outcomes such as post-operative pain will  
17 be assessed under a superiority hypothesis as we believe that this will be lower in the  
18 intervention arm. As stated in the sample size section, there is above 80% power to detect  
19 a difference of a quarter of a standard deviation under a superiority hypothesis. Subgroup  
20 analyses (appropriately analysed by testing treatment by subgroup interaction) will explore  
21 possible treatment effect modification. All analyses will follow a carefully documented  
22 Statistical Analysis Plan. Pre specified subgroups are:

- 23 • Mixed incontinence versus pure stress incontinence
- 24 • Urodynamic versus Clinically diagnosis of Stress Urinary Incontinence.
- 25 • Adjustable Anchored SIMS vs. each type of SMUS (i.e. RP-TVT and TO-TVT  
26 separately)
- 27 • Comparison of the main types of SIMS
- 28 • We will also include an exploratory subgroup analysis comparing those above and  
29 below the observed median age of the recruited women using a formal test of  
30 interaction.
- 31 • Responses to 2 validated sexual function questionnaire: ICIQ-FLUTsex vs. PISQ-  
32 IR

33  
34  
35 **Effect of Pregnancy:** MUS procedures are generally offered to women after having  
36 completed their families and therefore subsequent pregnancy is usually a rare event that is  
37 unlikely to be balanced between both trial arms. If a woman falls pregnant after receiving  
38 treatment within the RCT, her data will be censored at the time of confirmed pregnancy for  
39 the primary analysis. This small number of women will still be followed up for all outcome  
40 data as usual, and if the numbers warrant, a sensitivity analysis including them will be  
41 undertaken on the primary outcome.

42  
43 The Trial Steering Committee and an independent Data Monitoring and Ethics Committee  
44 (DMC) will be asked to review and comment on the Statistical Analysis Plan prior to  
45 analysis. There are no plans for any formal interim analyses to be seen by the DMC. A  
46 single main analysis will be performed on the 12 month primary outcome and repeated on  
47 the 2 and 3 year outcomes. The DMC will meet before recruitment begins, or as soon as  
48 practical, to agree the terms of reference and other procedures.

### 51 3.2. ECONOMIC EVALUATION

52 Our primary health economic evaluation will be from a health service provider's (NHS)  
53 perspective; however we will also present data from a wider societal perspective. These  
54 data will include costs to patients of time and travel, costs to carers and family members  
55 and costs to society as a whole, estimated from lost productivity as a result of time off work  
56 / away from normal activities.

#### 58 3.2.1. Collection of resource use and cost data

1 Health care resource use will be collected using patient administered questionnaires asking  
2 patients to retrospectively recall their contacts with health care professionals relating to  
3 their incontinence. This questionnaire will be administered at 3 & 12 months then yearly for  
4 3 years. It is generally accepted that patient recall is accurate up to 12 months and it is  
5 highly unlikely that a patient would not remember significant events relating to their disease  
6 over this time period. Data collected will include secondary care contacts (hospital inpatient  
7 admissions, outpatient appointments) and primary care contacts (e.g. GP contacts, nurse  
8 contacts, physiotherapist consultations) and prescription drug medications. These health  
9 care utilisation data will be combined with unit cost information for the use of specific  
10 resources using standard sources.<sup>29-31</sup> Data on costs for each group (SIMS and SMUS) will  
11 be summed to provide an average cost per patient trial participant. Sensitivity analysis will  
12 be used to explore various distributions of cost data as well as various methods for the  
13 imputation of missing and censored data. We will provide a comprehensive range of  
14 deterministic sensitivity analyses to test any assumptions we make in our analysis on the  
15 overall results. For example, we will test best and worst case scenarios for the intervention  
16 cost (whether all procedures in the SIMS arm are conducted under GA or LA). The impact  
17 of any missing data and methods of data imputation on our results will also be tested. We  
18 will test the impact of these and a range of other sensitivity analyses, to be determined as  
19 the trial progresses on all our results (e.g. cost utility analysis and cost benefit analysis).

### 22 3.2.2. Participant costs

23 Out of pocket patient expenses (including the purchase of containment products), private  
24 health care costs, travel costs and costs associated with lost days at work will also be  
25 collected using the patient administered questionnaire and incorporated into the patient  
26 perspective analysis. Costs of family members and/or carers will also be collected as part  
27 of the trial and reported.

### 29 3.2.3 Quality of life

30 Health state valuations will be based upon the responses to the ICIQ-LUTSqol (baseline,  
31 3, 12 months and annually over the follow up period) and EQ-5D administered at  
32 baseline, 1, 3 & 12 month and annually over the follow up period. These data will be  
33 transformed into utility values using standard algorithms. QALYs will be calculated, using  
34 the area under the curve methods, with any differences between groups being reported.  
35 Both measures will be compared and contrasted and tested for comparability in  
36 measuring outcomes for these women.

### 38 3.2.4. Cost effectiveness

39 The analysis will use the estimates of mean costs and QALYs as described for each trial  
40 participant to estimate the incremental cost-effectiveness ratio at 12-month follow-up  
41 period and where appropriate the analysis will mirror that of the statistical analyses.  
42 Cost-effectiveness (cost per QALY gained) will also be reported over the 3 year follow up  
43 period. The results of the analysis will be presented as incremental costs, effects and  
44 incremental cost per QALY. Bootstrapping of cost and QALY differences as well as a  
45 range of one way and multi-way deterministic sensitivity analyses will be conducted to  
46 address uncertainty in the estimates. Cost per QALY data will also be presented in the  
47 form of cost-effectiveness acceptability curves (CEAC).

### 49 3.2.5. Discrete choice experiment (DCE)

50 Previous research<sup>32</sup> has suggested that EQ-5D questionnaire may not fully capture the  
51 benefits from successfully treating incontinence. They may not fully represent patient  
52 preferences for treatments and their associated outcomes. Therefore, we will conduct a  
53 discrete choice experiment (DCE) to elicit preference for the process, patient experience  
54 and health outcomes. A DCE presents respondents with a series of hypothetical choices  
55 that describe the choice alternatives by their underlying attributes and ask respondents  
56 which alternative they prefer. The values of the attributes vary across choice scenarios, and  
57 by observing the choices people make it is possible to infer their preferences over the  
58  
59  
60



1 attributes of the goods under study. The extent to which an individual values an intervention  
2 depends upon the levels of these attributes.<sup>33</sup> DCEs are commonly used to identify  
3 people's preferences in a variety of non-market situations/services/commodities.<sup>34-36</sup>  
4

5 The attributes and levels for the DCE will be informed by systematic literature searching  
6 and advice sought from clinical experts. Attributes might include preferences for general /  
7 local anaesthetic, preferences for pain levels, cure and improvement rates, impact on  
8 activities of daily living, etc. These attributes and levels will be combined to identify profiles  
9 that will be used to develop scenarios to present the study participants. The questionnaire  
10 will be piloted amongst a convenience sample to refine all practical aspects of the survey  
11 and to ensure that trade-offs can be made between the identified attributes. Once the pilot  
12 is complete and the questionnaire has been refined it will be administered to the trial  
13 participants at the end of the 3yrs follow-up.  
14

15 Experimental design techniques will be used to generate an efficient set of choices from  
16 which preferences will be estimated. Logistic regression techniques will be used to analyse  
17 the response data. A cost attribute will be included so that willingness to pay (WTP) can be  
18 estimated. The results of the DCE information will be combined with the clinical outcomes  
19 estimated from the trial to provide an estimate of mean willingness to pay for each of the  
20 two interventions. Results of the WTP aspect of the DCE will be presented as incremental  
21 Net Benefits (NB) between groups where NB will be measured as WTP less mean cost for  
22 each intervention. The intervention with the greatest net benefit will be deemed the most  
23 efficient. The results of this analysis will be compared and contrasted with the cost/QALY  
24 outcomes and will yield some information regarding the applicability of traditional QALY  
25 measurement to conducting economic evaluation in urinary incontinence. The resultant  
26 costs and utilities will be used to estimate preference based quality weights for this  
27 condition.  
28

#### 29 **4. ORGANISATION: TRIAL MANAGEMENT AND OVERSIGHT ARRANGEMENTS**

##### 30 **4.1. Study Office in Aberdeen**

31 The Study Office is in the Centre for Healthcare Randomised Trials (CHaRT) based within  
32 the Health Services Research Unit, University of Aberdeen and provides day to day support  
33 for the clinical centres. The Trial Manager in CHaRT at Aberdeen will take responsibility for  
34 the day to day transaction of study activities. The Data co-ordinator will provide clerical  
35 support to the trial, including organising all aspects of the postal questionnaires (mailing,  
36 tracking, and entering returned data using the study web data entry portal). The CHaRT  
37 Quality Assurance Manager will oversee the demonstration that CHaRT's standard  
38 operating procedures for trials are being followed, including observance of the appropriate  
39 principles of GCP.  
40

41 At the centres, the recruitment coordinators/ research nurses will be responsible for all local  
42 processes involved in identifying, consenting, and randomising the participants, along with  
43 facilitating the delivery of the intervention, under the supervision of the lead surgeon.  
44

45 The SIMS Study Office Team will meet formally at least monthly during the course of the  
46 study to ensure smooth running and trouble-shooting. Finally, we intend to produce a  
47 regular SIMS Newsletter for participants and collaborators to inform everyone of progress  
48 and maintain enthusiasm.  
49

##### 50 **4.2. Local organisation in sites**

51 The Local PI and research nurse will be responsible for all aspects of local organisation  
52 including identifying, consenting, and randomising the participants, along with facilitating  
53 the delivery of the intervention and notification of any problem or unexpected developments  
54 for the duration of the trial. They will be responsible for ensuring that study data is collected  
55 for baseline assessments, collecting and recording participant study data on study specific  
56 Case Report Forms and will log all the details onto the remote web-based data capture  
57  
58  
59  
60

1 system as soon as practical after completion. The local PI will return all study documents  
2 to the study office in Aberdeen when requested.

### 3 **4.3. Project Management Group (PMG)**

4 The study will be supervised by a Project Management Group (PMG). The chair of this  
5 group will be the Chief Investigator (Mohamed Abdel-Fattah) and will consist of  
6 representatives from the Study Office and grant holders. The PMG will meet every 3  
7 months, including face-to-face in month 1 and month 6 in the first year. It is expected that,  
8 once the project is underway, the majority of these meetings will be held by teleconference;  
9 however, the PMG will also meet face-to-face at least annually. In addition, the PMG will  
10 also meet at the annual Trial Steering Committee meeting.

### 11 **4.4. Trial Steering Committee (TSC)**

12 The study is overseen by a Trial Steering Committee (TSC). The membership of this  
13 committee is comprised of the four independent members along with the Chief  
14 Investigator or a nominated delegate. The trial sponsors, other SIMS grant-holders and  
15 key members of the central office (e.g. the trial manager) can participate in TSC  
16 meetings but are not members. The funders will be notified in advance of meetings and  
17 a representative invited to attend. Other relevant experts may be invited to attend as  
18 appropriate. Details of the membership of the TSC can be found at the start of this  
19 protocol. CHaRT has adopted the TSC Charter adapted from the DAMOCLES Charter  
20 for DMCs and suggests to the independent TSC members that they adopt the Terms of  
21 Reference contained within. The TSC will meet approximately yearly.

### 22 **4.5. Data Monitoring Committee (DMC)**

23 An independent Data Monitoring Committee (DMC) will be convened. The DMC will be  
24 made up of members listed at the start of this protocol, one of whom is an experienced  
25 statistician. After the trial has been initiated the DMC will initially meet to agree its terms  
26 of reference and other procedures. CHaRT has adopted the DAMOCLES Charter for  
27 DMCs and suggests to the independent DMC members that they adopt the Terms of  
28 Reference contained within.

29 The committee will meet regularly to monitor the unblinded trial data and serious adverse  
30 events and make recommendations as to any modifications that are required to be made  
31 to the protocol or the termination of all or part of the trial.

## 32 **4.6. RESEARCH GOVERNANCE, DATA PROTECTION AND SPONSORSHIP**

### 33 **4.6.1. Research Governance**

34 The trial will be run under the auspices of CHaRT based at HSRU, University of  
35 Aberdeen. This will ensure compliance with Research Governance, and provide  
36 centralised trial administration, database support and economic and statistical analyses.  
37 CHaRT is a registered Clinical Trials Unit with particular expertise in running multicentre  
38 RCTs of complex and surgical interventions.

39 The PMG will ensure, through the TSC that adequate systems are in place for  
40 monitoring the quality of the study (compliance with GCP) and appropriate expedited and  
41 routine reports, to a level appropriate to the risk assessment of the study.

### 42 **4.6.2. Data protection**

43 Data collected during the course of the research will be kept strictly confidential and  
44 accessed only by members of the trial team. Participant's details will be stored on a secure  
45 database under the guidelines of the 1998 Data Protection Act and regular checks and  
46 monitoring are in place to ensure compliance. Data are stored securely in accordance with  
47 the Act and archived to a secure data storage facility. The senior IT manager (in  
48 collaboration with the Chief Investigator) will manage access rights to the data set.  
49 Participants will be allocated an individual specific trial number and their details will be  
50

1  
2  
3  
4  
5  
6  
7  
8  
9  
10  
11  
12  
13  
14  
15  
16  
17  
18  
19  
20  
21  
22  
23  
24  
25  
26  
27  
28  
29  
30  
31  
32  
33  
34  
35  
36  
37  
38  
39  
40  
41  
42  
43  
44  
45  
46  
47  
48  
49  
50  
51  
52  
53  
54  
55  
56  
57  
58  
59  
60

anonymised on the secure database. We anticipate that anonymised trial data may be shared with other researchers to enable international prospective meta-analyses. To comply with the 5th Principle of the Data Protection Act 1998, personal data will not be kept for longer than is required for the purpose for which it has been acquired.

#### 4.6.3. Sponsorship

The University of Aberdeen and NHS Grampian are the co-sponsors for the trial.

#### 4.7. QUALITY ASSURANCE

The trial will be monitored to ensure that the study is being conducted as per protocol, adhering to Research Governance, and the appropriate regulations. The approach to, and extent of, monitoring (specifying both central and on-site monitoring) will be specified in a trial monitoring plan which is usually initially determined by a risk assessment, undertaken prior to start of trial.

#### 4.8. DATA HANDLING, RECORD KEEPING AND ARCHIVING

Clinical data will be entered into the database by the local investigator and/or research nurse working in each hospital site, together with data from questionnaires completed at clinic. Questionnaires returned by post to the trial office will be entered there. Staff in the trial office will work closely with local research nurses to ensure that the data are as complete and accurate as possible. Extensive range and consistency checks will further enhance the quality of the data.

The co-sponsors are responsible for ensuring that trial data is archived appropriately. Essential data shall be retained for a period of at least 10 years following close of study.

#### 4.9. SATELLITE STUDIES

It is recognised, that the value of the study may be enhanced by smaller ancillary studies of specific aspects. Plans for these will be discussed in advance with the PMG. REC approval will be sought for any new proposal, if appropriate.

### 5. ETHICS AND REGULATORY APPROVALS

**5.1. Ethics Approval:** The North of Scotland Research Ethics Committee has reviewed and approved this study. The study will be conducted according to the principles of good clinical practice provided by Research Governance Guidelines. We believe this study does not pose any specific risks to individual participants beyond standard surgical procedures, nor does it raise any extraordinary ethical issues. Annual progress reports and a final report at the conclusion of the trial will be submitted to the North of Scotland REC within the timelines defined in the regulations.

**5.2. Finance and Insurance:** The trial is funded by a grant awarded by the NIHR Health Technology Assessment programme. The necessary trial insurance is provided by the University of Aberdeen.

### 6. Authorship and Publication Policy:

All RCTs conducted by CHaRT have a commitment to publish the findings of the research. At a minimum this trial will have a results paper published in a peer-reviewed medical/scientific journal. If all grant-holders and researcher staff fulfil authorship rules, group authorship will be used under the collective title of 'the SIMS Trial Group'. The CI, and possibly other members of the trial group will take responsibility for drafting the paper and this will be recognised by line" the CI (as primary author), followed by the other authors *and* the SIMS Trial Group'.

1 For reports which arise from the trial but where some members do not fulfil authorship  
2 rules (for example, specialist sub-study publications), authorship should be attributed to  
3 CI and the named individual(s) for the SIMS Trial Group.  
4

5 To safeguard the integrity of the main trial, reports of explanatory or satellite studies will  
6 not be submitted for publication without prior arrangement from the Project Management  
7 Group.  
8

9 We intend to maintain interest in the study by publication of SIMS newsletters at intervals  
10 for staff and collaborators. Once the main report has been published, a lay summary of  
11 the findings will be sent in a final SIMS Newsletter to all involved in the trial. Further  
12 details on the publication policy can be found in Appendix 5.  
13

## 14 **6. Discussion**

15 The SIMS study is a key outcome study that should answer the important research  
16 question of whether adjustable SIMS should be utilized in clinical practice as a first line  
17 surgical treatment option for women with primary SUJ.  
18

19 This study is a pragmatic patient-oriented trial aiming to capture a true representation of the  
20 actual patient population. The inclusion/exclusion criteria were chosen to allow the  
21 capturing of the relevant patient group.  
22

23 This trial seeks to follow standard pathways of care with the only additional intervention  
24 being randomisation between the two treatment strategies under test and collection of  
25 baseline and outcome information.  
26

27 The results will inform clinicians and policy makers on the cost-effectiveness of this  
28 relatively new technology compared to the SMUS. The long-term follow-up in the SIMS  
29 study is crucial to address the long-term successes rate and adverse events of MUS in  
30 general and SIMS in specific.  
31

### 32 **6.1. Dissemination:**

33 The dissemination plans include (1) HTA monograph; (2) presentation at international  
34 scientific meetings; (3) publications in high-impact open access peer-reviewed journals; (4)  
35 presentations at health economic and health services research meetings. The results of  
36 the trial will be included in the updates of NICE (National Institute of Clinical Excellence)  
37 and EAU (European Association of Urology) guidelines; these two specific guidelines  
38 directly influence practice of all the UK and worldwide specialists respectively. In-addition, a  
39 plain English language summary of the main findings and results will be presented for  
40 relevant patient organisations and communities, including the bladder and bowel  
41 foundation. This will ensure user relevance in dissemination of the results.  
42  
43  
44  
45

### 46 **6.2. Trial Status**

47 The SIMS study is currently recruiting in 20 UK research centres. The first patient was  
48 randomised on 4<sup>th</sup> February 2014 with follow-up completed at end of February 2020.  
49  
50  
51  
52  
53  
54  
55  
56  
57  
58  
59  
60

## REFERENCE LIST

1. *Urinary incontinence; full guideline. CG40 [document on the Internet]*. London: National Institute for Health and Clinical Excellence; 2006 [accessed January 2013]. URL: <http://guidance.nice.org.uk/CG40/Guidance/pdf/English>
2. Perry S, Shaw C, Assassa P, Dallosso H, Williams K, Brittain KR et al. An epidemiological study to establish the prevalence of urinary symptoms and felt need in the community: the Leicestershire MRC Incontinence Study. Leicestershire MRC Incontinence Study Team. *J Public Health Med* 2000;**22**:427-34
3. Fultz N, Girts T, Kinchen K, Nygaard I, Pohl G, Sternfeldt B. Prevalence, management and impact of urinary incontinence in the workplace. *Occupal Med* 2005;**55**:552-7.
4. Turner DA, Shaw C, McGrother CW, Dallosso HM, Cooper NJ, MRC Incontinence Team. The cost of clinically significant urinary storage symptoms for community dwelling adults in the UK. *BJU Int* 2004;**93**:1246-52
5. Fultz NH, Burgio K, Diokno AC, Kinchen KS, Obenchain R, Bump RC. Burden of stress urinary incontinence for community-dwelling women. *Am J Obstet Gynecol* 2003;**189**:1275-82
6. Papanicolaou S, Pons ME, Hampel C, Monz B, Quail D, Schulenburg MG et al. Medical resource utilisation and cost of care for women seeking treatment for urinary incontinence in an outpatient setting. Examples from three countries participating in the PURE study. *Maturitas* 2005;**52**:Suppl-47
7. Abrams P, Artibani W, Cardozo L, Khoury S, Wein A. *Clinical manual of incontinence in women*. Health Publications Ltd; 2005
8. Jacklin P, Duckett J, Renganathan A. Analytic model comparing the cost utility of TVT versus duloxetine in women with urinary stress incontinence. *Int Urogynecol J* 2010;**21**:977-84
9. Ogah J, Cody JD, Rogerson L. Minimally invasive synthetic suburethral sling operations for stress urinary incontinence in women. *Cochrane Database of Systematic Reviews* 2009; Issue 4 Art. No.: CD006375. DOI: 10.1002/14651858.CD006375.pub2
10. Assassa P, Moran P, Duckett J, Bjug B. Stress incontinence surgery in the UK (1). Pre-operative work up and intra-operative complications. Analysis of the British society of urogynaecology database. *Neurourol Urodyn* 2010;**29**:809-10
11. Lucas MG, Bosch R, Burkhard FC, et al. EAU guidelines on surgical treatment of urinary incontinence. *Eur Urol* 2012;**62**:1118–29
12. Giberti C, Gallo F, Cortese P, Schenone M. The suburethral tension adjustable sling (REMEEX system) in the treatment of female urinary incontinence due to 'true' intrinsic sphincter deficiency: results after 5 years of mean follow-up. *BJU Int* 2011;**108**:1140–4
13. Barrington J, Archer R, Kulkarni M, Forrest A. The TRT Female Remeex System for recurrent female stress urinary incontinence: a 5-year follow-up study. *J Obstet Gynaecol* 2013;**33**:391–3
14. Gadjiev N, Tabaza R, Kirschner-Hermanns R. Mini-sling: what is known about anchorage systems? *Neurourol Urodyn* 2012;**31**: 709–1102
15. Kocjancic E, Sedlar A. A strength comparison of immediate and delayed extraction forces of 5 different single incision slings anchor types: an animal model. *Int Urogynaecol J (Suppl 2)*:2012:S115
16. Abdel-fattah M, Agur W, Abdel-All M, Guerrero K, Allam M, Mackintosh A et al. Prospective multi-centre study of adjustable single-incision mini-sling (Ajust() ) in the management of stress urinary incontinence in women: 1-year follow-up study. *BJU Int* 2012;**109**:880-6.
17. Mostafa A, Agur W, Abdel-All M, Guerrero K, Lim C, Allam M et al. Multicentre prospective randomised study of single-incision midurethral sling (SIMS- Ajust) versus tension-free vaginal tapeobturator (TVT-OTM) in management of female stress urinary incontinence (SUI): A minimum of one year follow-up. *Urology* 2013; <http://dx.doi.org/10.1016/j.urology.2013.02.080>
18. Schweitzer K.J, Cromheecke A.K, Milani H.W., Van Eijndhoven D, Gietelink E, Hallenleben C.H et al. A Randomized Controlled Trial Comparing The Tvt-O® With

- 1 The Ajust® As Primary Surgical Treatment Of Female Stress Urinary Incontinence. *Int*  
2 *Urogynecol J* 2012;**23**(Suppl 2):S77-S78
- 3 19. Cornu JN, Ciofu C, Sebe P, Peyrat L, Haab F. Cure Of Women Stress Urinary  
4 Incontinence With The Ajust Single Incision Sling: One Year Results. *Neurourol*  
5 *Urodyn* 2011;**30**:868
- 6 20. Lucente V, Cornu JN, Sebe P, Peyrat L, Ciofu C, Haab F. Ajust single incision  
7 transobturator sling procedure for stress urinary incontinence in women. *Int*  
8 *Urogynecol J* 2011;**22**(Suppl 2):S1041
- 9 21. Meschia M, Barbacini P, Baccichet R, Buonaguidi A, Maffioli M, Ricci L et al. Short-  
10 term outcomes with the Ajust™ system: a new single incision sling for the treatment of  
11 stress urinary incontinence. *Int Urogynecol J* 2011;**22**:177-82
- 12 22. Mostafa A, Lim C, Madhuvata P, Abdel-fattah M. Single-Incision Mini-Slings Versus  
13 Standard Midurethral Slings in Surgical Management of Female Stress Urinary  
14 Incontinence: An Updated Systematic Review and Meta-analysis of Effectiveness and  
15 Complications. *Eur Urol* (2013), <http://dx.doi.org/10.1016/j.eururo.2013.08.032>
- 16 23. Sivaslioglu AA, Unlubilgin E, Aydogmus S, Keskin L, Dolen I. A prospective  
17 randomized controlled trial of the transobturator tape and tissue fixation mini-sling in  
18 patients with stress urinary incontinence: 5-year results. *J Urol* 2012;**188**:194-9
- 19 24. Naumann G, Hagemeyer T, Zachmann S, Ali-Ani A, Skala C, Albrich S. Ajust™ fully  
20 adjustable single incision sling for the treatment of stress urinary incontinence: 1 year  
21 follow-up on a new minimal-invasive treatment for female SUI. *Int Urogynecol J*  
22 2011;**22**(Suppl 2):S1050
- 23 25. Boyers D, Kilonzo M, Mostafa A, Abdel-fattah M. Single incision mini-slings versus  
24 standard mid-urethral slings in surgical management of female stress urinary  
25 incontinence: A costeffectiveness analysis alongside a randomised controlled trial.  
26 *Neurourol Urodyn* 2012;**31**:726-7
- 27 26. U. Ulmsten, L. Henriksson, P. Johnson and G. Varhos, An ambulatory surgical  
28 procedure under local anesthesia for treatment of female urinary incontinence. *Int*  
29 *Urogynecol J* 1996; 7: 81–86.
- 30 27. E. Delorme, Transobturator urethral suspension: mini-invasive procedure in the  
31 treatment of stress urinary incontinence in women, *Prog Urol* **11** 2001; 6: 1306–1313.
- 32 28. De Leval J. Novel surgical technique for treatment of female stress urinary  
33 incontinence: transobturator vaginal tape inside-out. *Eur Urol* 2003; 44: 724–30.
- 34 29. *NHS speciality costs: acute costs [database on the Internet]*. Edinburgh: Information  
35 Services Division (ISD) Scotland; 2010 [accessed January 2013].URL:  
36 [http://www.isdscotland.org/Health-Topics/Finance/Costbook/Speciality-Costs/Acute-](http://www.isdscotland.org/Health-Topics/Finance/Costbook/Speciality-Costs/Acute-Surgical.asp)  
37 [Surgical.asp](http://www.isdscotland.org/Health-Topics/Finance/Costbook/Speciality-Costs/Acute-Surgical.asp)
- 38 30. *NHS reference costs 2011-12 [document on the Internet]*. UK Department of Health;  
39 2012 [accessed January 2013]. URL: [http://www.dh.gov.uk/health/2012/11/2011-12-](http://www.dh.gov.uk/health/2012/11/2011-12-reference-costs/)  
40 [reference-costs/](http://www.dh.gov.uk/health/2012/11/2011-12-reference-costs/)
- 41 31. *British National Formulary [website on the Internet]*. British Medical Association and  
42 Royal Pharmaceutical Society; 2013 [accessed January 2013].  
43 URL:<http://www.bnf.org/bnf/index.htm>
- 44 32. Imamura M, Abrams P, Bain C, Buckley B, Cardozo L, Cody J et al. Systematic review  
45 and economic modelling of the effectiveness and cost-effectiveness of non-surgical  
46 treatments for women with stress urinary incontinence. *Health Technol Assess*  
47 2010;**14**(40)
- 48 33. Ryan M, Watson V, Amaya-Amaya M. Methodological issues in the monetary valuation  
49 of benefits in healthcare. *Expert Rev Pharmacoecon Outcome Res* 2003;**3**:717-27.
- 50 34. Bateman I, Carson R, Day B, Hanemann M, Hanley N, Hett T. *Economic valuation with*  
51 *stated preference techniques: A manual*. UK Department of Transport; Edward Elgar  
52 Publishing; 2002
- 53 35. Hensher D.A, Rose J.M, Greene W.H. The implications on willingness to pay of  
54 respondents ignoring specific attributes. *Transportation* 2005;**32**:203-22.
- 55 36. Louviere J.J, Hensher D.A, Swait J. *Stated choice methods: analysis and application*.  
56 Cambridge: Cambridge University Press; 2000
- 57  
58  
59  
60

1 **Funding Statement:** This is a UK Collaborative Study funded by the NIHR Evaluation,  
2 Health Technology Assessment (HTA) Programme - Funder Number 12/127/157  
3

4 **Authors' Contributions:** MAF conceived the idea and wrote the protocol; JN contributed  
5 to the study design and the statistical analysis; GML contributed to the study design, the  
6 sample size calculation and wrote the statistical analysis plan; MK designed and wrote the  
7 economic analysis plan; PA contributed to the clinical aspects of the protocol; JND  
8 contributed to the study design and clinical aspects of the protocol; JW contributed the  
9 layman summary as the patient representative; KM contributed to the study design, flow/  
10 gantt charts; TD and AMD contributed to the trial oversight and the protocol amendments.  
11

12 **Competing Interests:** MAF has been previously speaker and or trainer for Bard, Astellas,  
13 Pfizer, AMS and Coloplast. He received travel grants to attend medical conferences from  
14 various companies and previously performed a research-led project funded by a research  
15 Grant from Coloplast which was received and administered by University of Aberdeen.  
16 MAF was the Chairman of Scottish Pelvic Floor Network which received support from  
17 different pharmaceutical and devices Companies. MAF and Phil Assassa have provided  
18 industry-sponsorship proctorship training sessions to a number of surgeons training in  
19 SIMS prior to the study. None of the co-applicants have any financial interest, shares or sit  
20 on the advisory board for any relevant device companies.  
21  
22  
23  
24  
25  
26  
27  
28  
29  
30  
31  
32  
33  
34  
35  
36  
37  
38  
39  
40  
41  
42  
43  
44  
45  
46  
47  
48  
49  
50  
51  
52  
53  
54  
55  
56  
57  
58  
59  
60

Figure 1 Flow diagram

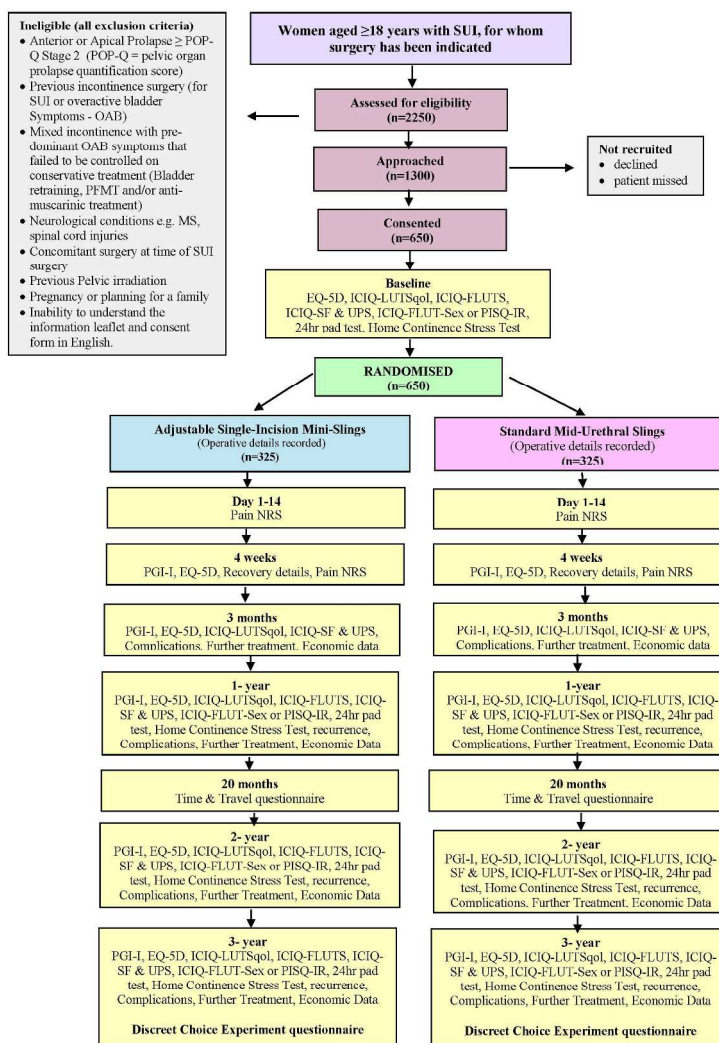

10/10/16

Figure 1: SIMS Study Flow Chart

210x297mm (300 x 300 DPI)



1  
2  
3  
4  
5  
6  
7  
8  
9  
10  
11  
12  
13  
14  
15  
16  
17  
18  
19  
20  
21  
22  
23  
24  
25  
26  
27  
28  
29  
30  
31  
32  
33  
34  
35  
36  
37  
38  
39  
40  
41  
42  
43  
44  
45  
46  
47  
48  
49  
50  
51  
52  
53  
54  
55  
56  
57  
58  
59  
60

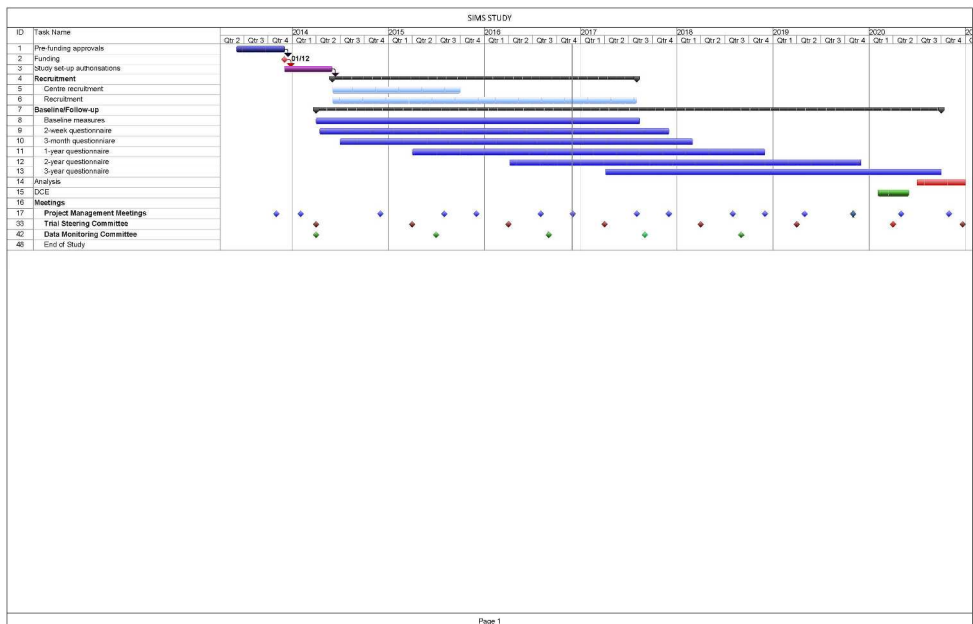

Figure 2: SIMS Study Gantt Chart

297x210mm (300 x 300 DPI)

Review only

## Appendix 1

### Local Anaesthesia (LA) Guidance for SIMS RCT

#### Pre-operative Analgesia:

All participants, in both arms, should receive within 30-60 minutes of the operation:

- Paracetamol Oral/PR 1gm and NSAID (Diclofenac Sodium -100mg or Ibuprofen 400mg – Oral/ PR) and,
- Oral opiate analgesia (Oral morphine 10-20 mg or MST Continus 10-30mg) if not contra-indicated; (the lower doses are to be used in women  $\geq$  65 years) and,
- EMLA cream applied vaginally to the sub-urethral area by the patient/ nurse (a 5% emulsion preparation, containing 2.5% each of lidocaine/prilocaine)
- Optional:
  - Instillagel 5ml intra-urethral by the nurse (anaesthetic, lubricant).
  - For anxious patients: oral anxiolytic (Temazepam 10-20 mg) can be given if not contra-indicated (if so please consider omitting the opiate analgesia).
  - Consider oral /IM anti-emetics in women receiving opiate analgesia

#### Local Anaesthesia:

- Fast-acting LA: Infiltrate 4-5 mls of Lignocaine 1% with adrenaline 1:200,000 (max dose 3.5mg/kg bodyweight) into the peri-urethral area at site of future application of instruments (using orange needle 25G). This is fast acting LA, in-addition to the EMLA cream, will allow you to apply instruments to the peri-urethral area.

- Long-acting LA: Infiltrate  $\pm$  40mls of Levo-Bupivacaine 2.5mg/ml (Chirocaine - max dose 1.5 mg/kg bodyweight) OR, Bupivacaine 0.25% with adrenaline 1:200,000 (Carbostesin - max dose 2 mg/kg bodyweight) into:

- a) the vaginal angles (using green needle 21G) until the bilateral vaginal sulci are obliterated (5 mls on each side)
  - b) the obturator membrane and muscles (using curved black spinal needle 22G to hook behind the inferior pubic ramus; 10 mls on each side).
- Once the para-urethral tunnels are dissected up-to the obturator membranes, further infiltration (using Pudendal block or Spinal needle), into the exact site of insertion of the SIMS anchor is recommended using fast acting LA (5mls) and followed by long-acting LA (5mls) on each side.
- ❖ Patients should accompanied by a dedicated nurse during the operation for support.
  - ❖ All doses should to be tailored to patients' medical condition and weight.
  - ❖ We recommend you adhere to this guidance however deviation in the way of infiltration or the type of LA is accepted provided you keep within the general types and appropriate doses described.

SIMS - RCT LA Guidance V2 - Feb 2014

# Pathway for Postoperative Voiding Assessment & Management of Voiding Dysfunction for Women Following Surgery for Mid-urethral slings

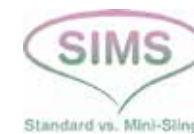

**This applies to patients who were not catheterised postoperatively, or after removal of the urethral catheter (and after stopping IV fluids if applicable).**

1. Encourage average fluid intake: 150-200mls/ hour (1 glass/hour).
2. Patients should empty their bladder/ 3-4 hours and encouraged to try to hold in-between if possible.
3. 1st void should be expected within 4 hours (may need prompting by nursing staff); otherwise a bladder-scan assessment is required to rule out retention.
4. Measure Voided Volume (VV) and Post-voiding Residual Urine (PVR) using Bladder-scan following each void. **"Satisfactory Voiding"** is achieved when **PVR ≤ 1/3 of bladder capacity and ≤ 150mls.**
5. Patients can be instructed in "Double Voiding" (void twice with 5 minutes interval & scanned for PVR after the second void; VV is then measured as total of the 2 voids).

| Examples of Satisfactory Voiding |           |
|----------------------------------|-----------|
| VV (mls)                         | PVR (mls) |
| 200                              | ≤120      |
| ≥250                             | ≤150      |

**Once satisfactory Voiding is achieved (one assessment); patient can be discharged**

N.B. In some units, surgeons leave 200 mls in bladder after cystoscopy so that patients feel the desire to pass urine early.

## Management of Patients with Unsatisfactory Voiding Assessment:

Patients with PVR > 150mls after 1st assessment as above; should be encouraged to try to void again within 20min or so and the VV measured

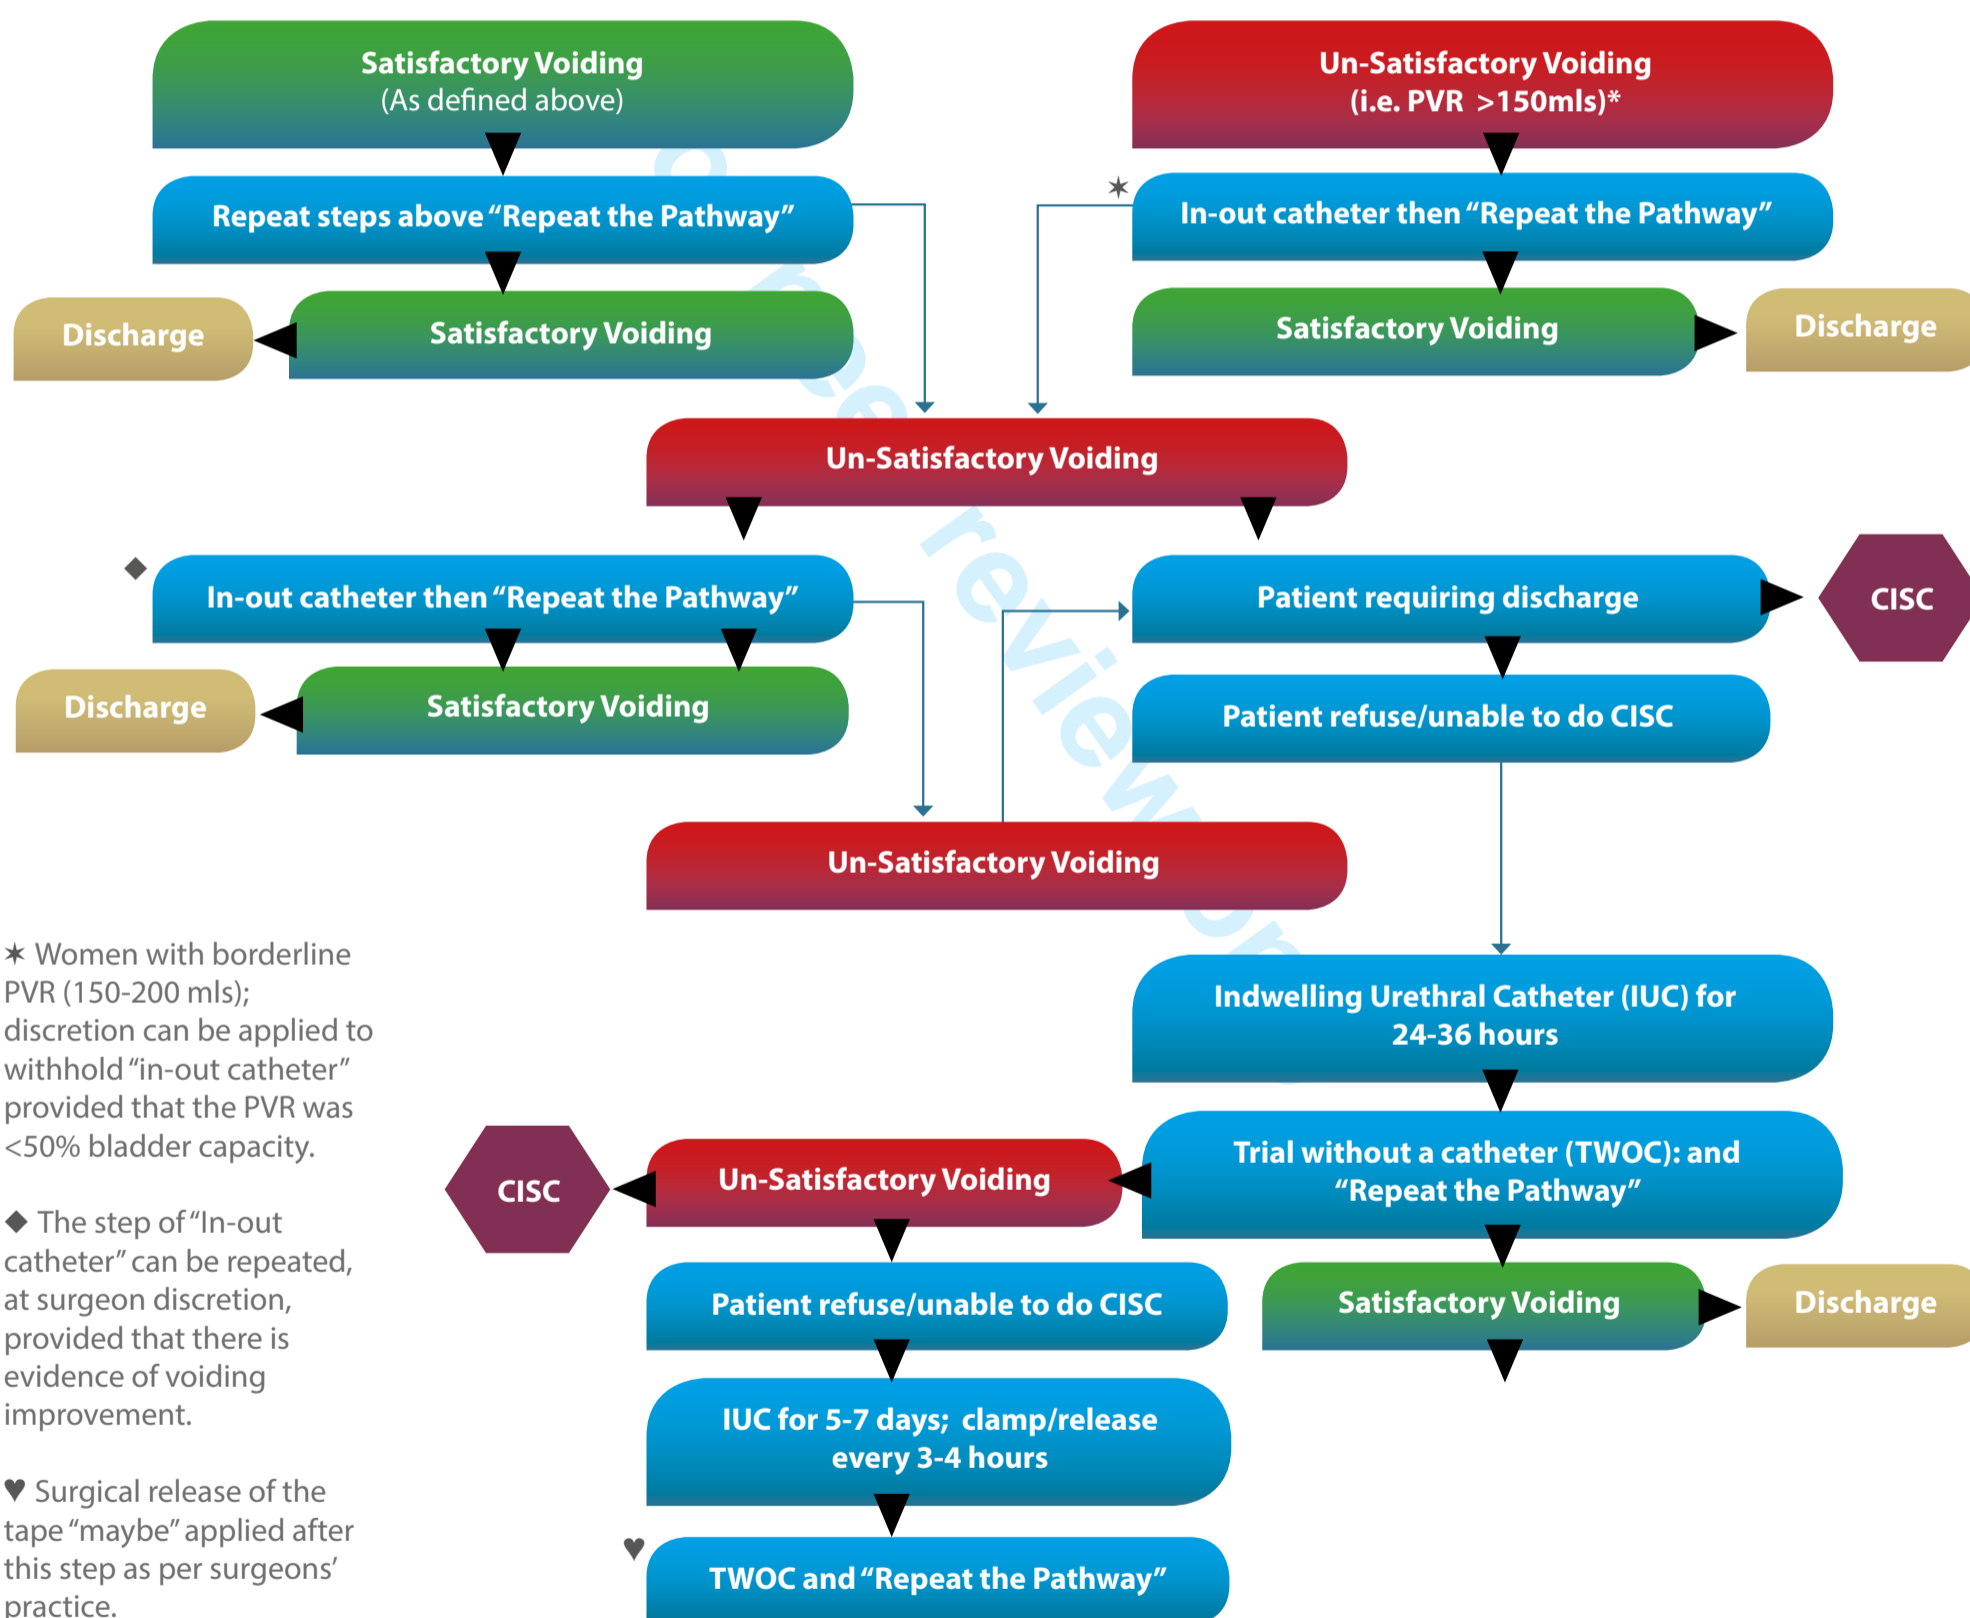

\* Women with borderline PVR (150-200 mls); discretion can be applied to withhold "in-out catheter" provided that the PVR was <50% bladder capacity.

◆ The step of "In-out catheter" can be repeated, at surgeon discretion, provided that there is evidence of voiding improvement.

♥ Surgical release of the tape "maybe" applied after this step as per surgeons' practice.

## Management of CISC

Frequency of CISC/ day can be indicated by the level of the PVR (or per surgeon practice as no robust clinical evidence to base a recommendation) – see example below:

| PVR (> mls) | CISC/ day                                                                                                                                  |
|-------------|--------------------------------------------------------------------------------------------------------------------------------------------|
| 50 - 300    | 2                                                                                                                                          |
| 300 - 400   | 3                                                                                                                                          |
| >400        | For peer review only - <a href="http://bmjopen.bmj.com/site/about/guidelines.xhtml">http://bmjopen.bmj.com/site/about/guidelines.xhtml</a> |

Patients would be instructed to keep records of VV & PVR (for 2 days/ week) and follow-up is arranged (can be phone/ email/ in-person) in 1-2 weeks to check the volumes and the need to continue on CISC. If continuing, please check if any difficulties performing; whether the frequency needs to be altered and date of next review.

No need for "routine prescribing" of prophylactic antibiotics however local estrogen treatment can be considered in postmenopausal women.

### Appendix 3: Objective Assessment of Urinary Incontinence within the SIMS Trial - Protocol

- Participants will receive: ≥4 pre-weighed pads in two transparent self-sealing plastic bags (for the 24 hour pad test), 2 tissue continence sheets (for the home continence stress tests - HCST), instructions on how to perform the tests and a test evaluation questionnaire.
- Each participant will be asked to:-
  - Perform a standardised HCST.
  - Perform the 24-hours pad test (as described by the international continence society) using the provided pre-weighed pads.
  - Repeat the HCST at the end of the 24 hour pad test.
  - Report all their observations on the provided test questionnaire.
- At the end of the tests, women will be asked to complete an open question regarding their experience of the tests. Women's satisfaction/convenience with each test will also be assessed using 10-point Likert scales.
- **Pre-operatively**, participants will be asked to perform this test 24 hours prior to their operation and return any used pads and the test questionnaire to the local RN/team on the day of their surgery. The returned pads will be weighed using a gram sensitive scale and the pad gain, if any, will be calculated and recorded.
- **At 1, 2 and 3 years postoperative**, participants will return the completed test questionnaire and any used pads in the self-addressed pre-paid envelope provided within 24 hours of completion.
- The returned pads will be weighed by the researcher using a gram sensitive scale and the pad gain, if any, will be calculated and recorded.

Appendix 4: Recruitment projection:

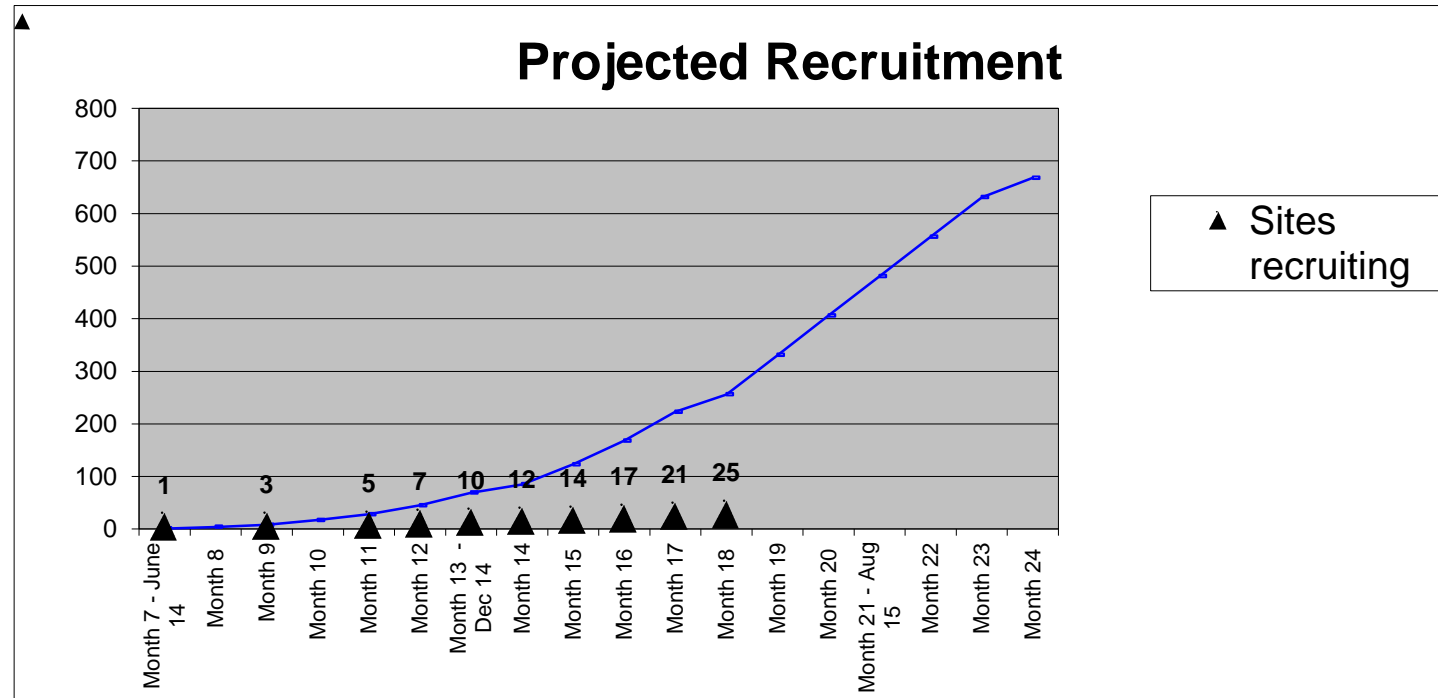

▲ Sites recruiting

only

1  
2  
3  
4  
5  
6  
7  
8  
9  
10  
11  
12  
13  
14  
15  
16  
17  
18  
19  
20  
21  
22  
23  
24  
25  
26  
27  
28  
29  
30  
31  
32  
33  
34  
35  
36  
37  
38  
39  
40  
41  
42  
43  
44  
45  
46  
47

1  
2  
3  
4  
5  
6  
7  
8  
9  
10  
11  
12  
13  
14  
15  
16  
17  
18  
19  
20  
21  
22  
23  
24  
25  
26  
27  
28  
29  
30  
31  
32  
33  
34  
35  
36  
37  
38  
39  
40  
41  
42  
43  
44  
45  
46  
47  
48  
49  
50  
51  
52  
53  
54  
55  
56  
57  
58  
59  
60

For peer review only

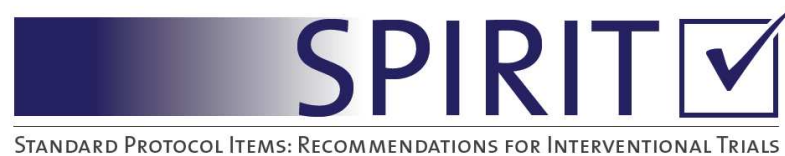

SPIRIT 2013 Checklist: Recommended items to address in a clinical trial protocol and related documents\*

| Section/item                      | Item No | Description                                                                                                                                                                                                                                                                              | Addressed on page number |
|-----------------------------------|---------|------------------------------------------------------------------------------------------------------------------------------------------------------------------------------------------------------------------------------------------------------------------------------------------|--------------------------|
| <b>Administrative information</b> |         |                                                                                                                                                                                                                                                                                          |                          |
| Title                             | 1       | Descriptive title identifying the study design, population, interventions, and, if applicable, trial acronym                                                                                                                                                                             | ___ 1 ___                |
| Trial registration                | 2a      | Trial identifier and registry name. If not yet registered, name of intended registry                                                                                                                                                                                                     | ___ 2 ___                |
|                                   | 2b      | All items from the World Health Organization Trial Registration Data Set                                                                                                                                                                                                                 | ___ 2-3 ___              |
| Protocol version                  | 3       | Date and version identifier                                                                                                                                                                                                                                                              | ___ n/a ___              |
| Funding                           | 4       | Sources and types of financial, material, and other support                                                                                                                                                                                                                              | ___ 1 ___                |
| Roles and responsibilities        | 5a      | Names, affiliations, and roles of protocol contributors                                                                                                                                                                                                                                  | ___ 1 ___                |
|                                   | 5b      | Name and contact information for the trial sponsor                                                                                                                                                                                                                                       | ___ 24 ___               |
|                                   | 5c      | Role of study sponsor and funders, if any, in study design; collection, management, analysis, and interpretation of data; writing of the report; and the decision to submit the report for publication, including whether they will have ultimate authority over any of these activities | ___ 16 & 24 ___          |
|                                   | 5d      | Composition, roles, and responsibilities of the coordinating centre, steering committee, endpoint adjudication committee, data management team, and other individuals or groups overseeing the trial, if applicable (see Item 21a for data monitoring committee)                         | ___ 22 & 23 ___          |

|    |                                                           |     |                                                                                                               |                   |
|----|-----------------------------------------------------------|-----|---------------------------------------------------------------------------------------------------------------|-------------------|
| 1  |                                                           |     |                                                                                                               |                   |
| 2  |                                                           |     |                                                                                                               |                   |
| 3  | <b>Introduction</b>                                       |     |                                                                                                               |                   |
| 4  |                                                           |     |                                                                                                               |                   |
| 5  | Background and                                            | 6a  | Description of research question and justification for undertaking the trial, including summary of relevant   | _____6_____       |
| 6  | rationale                                                 |     | studies (published and unpublished) examining benefits and harms for each intervention                        |                   |
| 7  |                                                           |     |                                                                                                               |                   |
| 8  |                                                           | 6b  | Explanation for choice of comparators                                                                         | _____6_____       |
| 9  |                                                           |     |                                                                                                               |                   |
| 10 | Objectives                                                | 7   | Specific objectives or hypotheses                                                                             | _____8_____       |
| 11 |                                                           |     |                                                                                                               |                   |
| 12 | Trial design                                              | 8   | Description of trial design including type of trial (eg, parallel group, crossover, factorial, single group), |                   |
| 13 |                                                           |     | allocation ratio, and framework (eg, superiority, equivalence, noninferiority, exploratory)                   | _____9_____       |
| 14 |                                                           |     |                                                                                                               |                   |
| 15 |                                                           |     |                                                                                                               |                   |
| 16 | <b>Methods: Participants, interventions, and outcomes</b> |     |                                                                                                               |                   |
| 17 |                                                           |     |                                                                                                               |                   |
| 18 | Study setting                                             | 9   | Description of study settings (eg, community clinic, academic hospital) and list of countries where data will | _____11_____      |
| 19 |                                                           |     | be collected. Reference to where list of study sites can be obtained                                          |                   |
| 20 |                                                           |     |                                                                                                               |                   |
| 21 | Eligibility criteria                                      | 10  | Inclusion and exclusion criteria for participants. If applicable, eligibility criteria for study centres and  | _____11_____      |
| 22 |                                                           |     | individuals who will perform the interventions (eg, surgeons, psychotherapists)                               |                   |
| 23 |                                                           |     |                                                                                                               |                   |
| 24 | Interventions                                             | 11a | Interventions for each group with sufficient detail to allow replication, including how and when they will be | _____9 - 10_____  |
| 25 |                                                           |     | administered                                                                                                  |                   |
| 26 |                                                           |     |                                                                                                               |                   |
| 27 |                                                           | 11b | Criteria for discontinuing or modifying allocated interventions for a given trial participant (eg, drug dose  | _____13_____      |
| 28 |                                                           |     | change in response to harms, participant request, or improving/worsening disease)                             |                   |
| 29 |                                                           |     |                                                                                                               |                   |
| 30 |                                                           | 11c | Strategies to improve adherence to intervention protocols, and any procedures for monitoring adherence        | _____n/a_____     |
| 31 |                                                           |     | (eg, drug tablet return, laboratory tests)                                                                    |                   |
| 32 |                                                           |     |                                                                                                               |                   |
| 33 |                                                           | 11d | Relevant concomitant care and interventions that are permitted or prohibited during the trial                 | _____11_____      |
| 34 |                                                           |     |                                                                                                               |                   |
| 35 | Outcomes                                                  | 12  | Primary, secondary, and other outcomes, including the specific measurement variable (eg, systolic blood       | _____16 - 17_____ |
| 36 |                                                           |     | pressure), analysis metric (eg, change from baseline, final value, time to event), method of aggregation (eg, |                   |
| 37 |                                                           |     | median, proportion), and time point for each outcome. Explanation of the clinical relevance of chosen         |                   |
| 38 |                                                           |     | efficacy and harm outcomes is strongly recommended                                                            |                   |
| 39 |                                                           |     |                                                                                                               |                   |
| 40 | Participant timeline                                      | 13  | Time schedule of enrolment, interventions (including any run-ins and washouts), assessments, and visits for   | Figure 1 p29,     |
| 41 |                                                           |     | participants. A schematic diagram is highly recommended (see Figure)                                          | Table 1, p17      |
| 42 |                                                           |     |                                                                                                               |                   |
| 43 |                                                           |     |                                                                                                               |                   |
| 44 |                                                           |     |                                                                                                               |                   |
| 45 |                                                           |     |                                                                                                               |                   |
| 46 |                                                           |     |                                                                                                               |                   |
| 47 |                                                           |     |                                                                                                               |                   |
| 48 |                                                           |     |                                                                                                               |                   |
| 49 |                                                           |     |                                                                                                               |                   |



|   |             |    |                                                                                                                                                                                       |             |
|---|-------------|----|---------------------------------------------------------------------------------------------------------------------------------------------------------------------------------------|-------------|
| 1 |             |    |                                                                                                                                                                                       |             |
| 2 |             |    |                                                                                                                                                                                       |             |
| 3 | Sample size | 14 | Estimated number of participants needed to achieve study objectives and how it was determined, including clinical and statistical assumptions supporting any sample size calculations | __18 - 19__ |
| 4 |             |    |                                                                                                                                                                                       |             |
| 5 |             |    |                                                                                                                                                                                       |             |
| 6 | Recruitment | 15 | Strategies for achieving adequate participant enrolment to reach target sample size                                                                                                   | __19__      |
| 7 |             |    |                                                                                                                                                                                       |             |

### 8 **Methods: Assignment of interventions (for controlled trials)**

#### 9 Allocation:

|    |                                  |     |                                                                                                                                                                                                                                                                                                                                                          |         |
|----|----------------------------------|-----|----------------------------------------------------------------------------------------------------------------------------------------------------------------------------------------------------------------------------------------------------------------------------------------------------------------------------------------------------------|---------|
| 10 |                                  |     |                                                                                                                                                                                                                                                                                                                                                          |         |
| 11 |                                  |     |                                                                                                                                                                                                                                                                                                                                                          |         |
| 12 | Sequence generation              | 16a | Method of generating the allocation sequence (eg, computer-generated random numbers), and list of any factors for stratification. To reduce predictability of a random sequence, details of any planned restriction (eg, blocking) should be provided in a separate document that is unavailable to those who enrol participants or assign interventions | __12__  |
| 13 |                                  |     |                                                                                                                                                                                                                                                                                                                                                          |         |
| 14 |                                  |     |                                                                                                                                                                                                                                                                                                                                                          |         |
| 15 |                                  |     |                                                                                                                                                                                                                                                                                                                                                          |         |
| 16 |                                  |     |                                                                                                                                                                                                                                                                                                                                                          |         |
| 17 |                                  |     |                                                                                                                                                                                                                                                                                                                                                          |         |
| 18 | Allocation concealment mechanism | 16b | Mechanism of implementing the allocation sequence (eg, central telephone; sequentially numbered, opaque, sealed envelopes), describing any steps to conceal the sequence until interventions are assigned                                                                                                                                                | __12__  |
| 19 |                                  |     |                                                                                                                                                                                                                                                                                                                                                          |         |
| 20 |                                  |     |                                                                                                                                                                                                                                                                                                                                                          |         |
| 21 |                                  |     |                                                                                                                                                                                                                                                                                                                                                          |         |
| 22 | Implementation                   | 16c | Who will generate the allocation sequence, who will enrol participants, and who will assign participants to interventions                                                                                                                                                                                                                                | __12__  |
| 23 |                                  |     |                                                                                                                                                                                                                                                                                                                                                          |         |
| 24 |                                  |     |                                                                                                                                                                                                                                                                                                                                                          |         |
| 25 | Blinding (masking)               | 17a | Who will be blinded after assignment to interventions (eg, trial participants, care providers, outcome assessors, data analysts), and how                                                                                                                                                                                                                | __n/a__ |
| 26 |                                  |     |                                                                                                                                                                                                                                                                                                                                                          |         |
| 27 |                                  |     |                                                                                                                                                                                                                                                                                                                                                          |         |
| 28 |                                  |     |                                                                                                                                                                                                                                                                                                                                                          |         |
| 29 |                                  | 17b | If blinded, circumstances under which unblinding is permissible, and procedure for revealing a participant's allocated intervention during the trial                                                                                                                                                                                                     | __n/a__ |
| 30 |                                  |     |                                                                                                                                                                                                                                                                                                                                                          |         |
| 31 |                                  |     |                                                                                                                                                                                                                                                                                                                                                          |         |

### 32 **Methods: Data collection, management, and analysis**

|    |                         |     |                                                                                                                                                                                                                                                                                                                                                                                                              |                   |
|----|-------------------------|-----|--------------------------------------------------------------------------------------------------------------------------------------------------------------------------------------------------------------------------------------------------------------------------------------------------------------------------------------------------------------------------------------------------------------|-------------------|
| 33 |                         |     |                                                                                                                                                                                                                                                                                                                                                                                                              |                   |
| 34 | Data collection methods | 18a | Plans for assessment and collection of outcome, baseline, and other trial data, including any related processes to promote data quality (eg, duplicate measurements, training of assessors) and a description of study instruments (eg, questionnaires, laboratory tests) along with their reliability and validity, if known. Reference to where data collection forms can be found, if not in the protocol | __12-13 & 16-17__ |
| 35 |                         |     |                                                                                                                                                                                                                                                                                                                                                                                                              |                   |
| 36 |                         |     |                                                                                                                                                                                                                                                                                                                                                                                                              |                   |
| 37 |                         |     |                                                                                                                                                                                                                                                                                                                                                                                                              |                   |
| 38 |                         |     |                                                                                                                                                                                                                                                                                                                                                                                                              | Trial Master File |
| 39 |                         |     |                                                                                                                                                                                                                                                                                                                                                                                                              |                   |
| 40 |                         | 18b | Plans to promote participant retention and complete follow-up, including list of any outcome data to be collected for participants who discontinue or deviate from intervention protocols                                                                                                                                                                                                                    | __19__            |
| 41 |                         |     |                                                                                                                                                                                                                                                                                                                                                                                                              |                   |
| 42 |                         |     |                                                                                                                                                                                                                                                                                                                                                                                                              |                   |
| 43 |                         |     |                                                                                                                                                                                                                                                                                                                                                                                                              |                   |
| 44 |                         |     |                                                                                                                                                                                                                                                                                                                                                                                                              |                   |
| 45 |                         |     |                                                                                                                                                                                                                                                                                                                                                                                                              |                   |

|    |                                 |     |                                                                                                                                                                                                                                                                                                                                       |                 |
|----|---------------------------------|-----|---------------------------------------------------------------------------------------------------------------------------------------------------------------------------------------------------------------------------------------------------------------------------------------------------------------------------------------|-----------------|
| 1  |                                 |     |                                                                                                                                                                                                                                                                                                                                       |                 |
| 2  |                                 |     |                                                                                                                                                                                                                                                                                                                                       |                 |
| 3  | Data management                 | 19  | Plans for data entry, coding, security, and storage, including any related processes to promote data quality (eg, double data entry; range checks for data values). Reference to where details of data management procedures can be found, if not in the protocol                                                                     | ___ 17 & 24 ___ |
| 4  |                                 |     |                                                                                                                                                                                                                                                                                                                                       |                 |
| 5  |                                 |     |                                                                                                                                                                                                                                                                                                                                       |                 |
| 6  |                                 |     |                                                                                                                                                                                                                                                                                                                                       |                 |
| 7  | Statistical methods             | 20a | Statistical methods for analysing primary and secondary outcomes. Reference to where other details of the statistical analysis plan can be found, if not in the protocol                                                                                                                                                              | ___ 19 - 20 ___ |
| 8  |                                 |     |                                                                                                                                                                                                                                                                                                                                       |                 |
| 9  |                                 |     |                                                                                                                                                                                                                                                                                                                                       |                 |
| 10 |                                 | 20b | Methods for any additional analyses (eg, subgroup and adjusted analyses)                                                                                                                                                                                                                                                              | ___ 20 ___      |
| 11 |                                 |     |                                                                                                                                                                                                                                                                                                                                       |                 |
| 12 |                                 | 20c | Definition of analysis population relating to protocol non-adherence (eg, as randomised analysis), and any statistical methods to handle missing data (eg, multiple imputation)                                                                                                                                                       | ___ 20 ___      |
| 13 |                                 |     |                                                                                                                                                                                                                                                                                                                                       |                 |
| 14 |                                 |     |                                                                                                                                                                                                                                                                                                                                       |                 |
| 15 |                                 |     |                                                                                                                                                                                                                                                                                                                                       |                 |
| 16 | <b>Methods: Monitoring</b>      |     |                                                                                                                                                                                                                                                                                                                                       |                 |
| 17 |                                 |     |                                                                                                                                                                                                                                                                                                                                       |                 |
| 18 | Data monitoring                 | 21a | Composition of data monitoring committee (DMC); summary of its role and reporting structure; statement of whether it is independent from the sponsor and competing interests; and reference to where further details about its charter can be found, if not in the protocol. Alternatively, an explanation of why a DMC is not needed | ___ 23 ___      |
| 19 |                                 |     |                                                                                                                                                                                                                                                                                                                                       |                 |
| 20 |                                 |     |                                                                                                                                                                                                                                                                                                                                       |                 |
| 21 |                                 |     |                                                                                                                                                                                                                                                                                                                                       |                 |
| 22 |                                 |     |                                                                                                                                                                                                                                                                                                                                       |                 |
| 23 |                                 | 21b | Description of any interim analyses and stopping guidelines, including who will have access to these interim results and make the final decision to terminate the trial                                                                                                                                                               | ___ n/a ___     |
| 24 |                                 |     |                                                                                                                                                                                                                                                                                                                                       |                 |
| 25 |                                 |     |                                                                                                                                                                                                                                                                                                                                       |                 |
| 26 | Harms                           | 22  | Plans for collecting, assessing, reporting, and managing solicited and spontaneously reported adverse events and other unintended effects of trial interventions or trial conduct                                                                                                                                                     | ___ 14 - 16 ___ |
| 27 |                                 |     |                                                                                                                                                                                                                                                                                                                                       |                 |
| 28 |                                 |     |                                                                                                                                                                                                                                                                                                                                       |                 |
| 29 | Auditing                        | 23  | Frequency and procedures for auditing trial conduct, if any, and whether the process will be independent from investigators and the sponsor                                                                                                                                                                                           | ___ 23 - 24 ___ |
| 30 |                                 |     |                                                                                                                                                                                                                                                                                                                                       |                 |
| 31 |                                 |     |                                                                                                                                                                                                                                                                                                                                       |                 |
| 32 |                                 |     |                                                                                                                                                                                                                                                                                                                                       |                 |
| 33 | <b>Ethics and dissemination</b> |     |                                                                                                                                                                                                                                                                                                                                       |                 |
| 34 |                                 |     |                                                                                                                                                                                                                                                                                                                                       |                 |
| 35 | Research ethics approval        | 24  | Plans for seeking research ethics committee/institutional review board (REC/IRB) approval                                                                                                                                                                                                                                             | ___ 24 ___      |
| 36 |                                 |     |                                                                                                                                                                                                                                                                                                                                       |                 |
| 37 |                                 |     |                                                                                                                                                                                                                                                                                                                                       |                 |
| 38 | Protocol amendments             | 25  | Plans for communicating important protocol modifications (eg, changes to eligibility criteria, outcomes, analyses) to relevant parties (eg, investigators, REC/IRBs, trial participants, trial registries, journals, regulators)                                                                                                      | ___ n/a ___     |
| 39 |                                 |     |                                                                                                                                                                                                                                                                                                                                       |                 |
| 40 |                                 |     |                                                                                                                                                                                                                                                                                                                                       |                 |
| 41 |                                 |     |                                                                                                                                                                                                                                                                                                                                       |                 |
| 42 |                                 |     |                                                                                                                                                                                                                                                                                                                                       |                 |
| 43 |                                 |     |                                                                                                                                                                                                                                                                                                                                       |                 |
| 44 |                                 |     |                                                                                                                                                                                                                                                                                                                                       |                 |
| 45 |                                 |     |                                                                                                                                                                                                                                                                                                                                       |                 |
| 46 |                                 |     |                                                                                                                                                                                                                                                                                                                                       |                 |
| 47 |                                 |     |                                                                                                                                                                                                                                                                                                                                       |                 |
| 48 |                                 |     |                                                                                                                                                                                                                                                                                                                                       |                 |
| 49 |                                 |     |                                                                                                                                                                                                                                                                                                                                       |                 |

|    |                               |     |                                                                                                                                                                                                                                                                                     |               |
|----|-------------------------------|-----|-------------------------------------------------------------------------------------------------------------------------------------------------------------------------------------------------------------------------------------------------------------------------------------|---------------|
| 1  |                               |     |                                                                                                                                                                                                                                                                                     |               |
| 2  |                               |     |                                                                                                                                                                                                                                                                                     |               |
| 3  | Consent or assent             | 26a | Who will obtain informed consent or assent from potential trial participants or authorised surrogates, and how (see Item 32)                                                                                                                                                        | _____12_____  |
| 4  |                               |     |                                                                                                                                                                                                                                                                                     |               |
| 5  |                               |     |                                                                                                                                                                                                                                                                                     |               |
| 6  |                               | 26b | Additional consent provisions for collection and use of participant data and biological specimens in ancillary studies, if applicable                                                                                                                                               | _____n/a_____ |
| 7  |                               |     |                                                                                                                                                                                                                                                                                     |               |
| 8  |                               |     |                                                                                                                                                                                                                                                                                     |               |
| 9  | Confidentiality               | 27  | How personal information about potential and enrolled participants will be collected, shared, and maintained in order to protect confidentiality before, during, and after the trial                                                                                                | _____23_____  |
| 10 |                               |     |                                                                                                                                                                                                                                                                                     |               |
| 11 |                               |     |                                                                                                                                                                                                                                                                                     |               |
| 12 | Declaration of interests      | 28  | Financial and other competing interests for principal investigators for the overall trial and each study site                                                                                                                                                                       | _____n/a_____ |
| 13 |                               |     |                                                                                                                                                                                                                                                                                     |               |
| 14 |                               |     |                                                                                                                                                                                                                                                                                     |               |
| 15 | Access to data                | 29  | Statement of who will have access to the final trial dataset, and disclosure of contractual agreements that limit such access for investigators                                                                                                                                     | _____n/a_____ |
| 16 |                               |     |                                                                                                                                                                                                                                                                                     |               |
| 17 |                               |     |                                                                                                                                                                                                                                                                                     |               |
| 18 | Ancillary and post-trial care | 30  | Provisions, if any, for ancillary and post-trial care, and for compensation to those who suffer harm from trial participation                                                                                                                                                       | _____n/a_____ |
| 19 |                               |     |                                                                                                                                                                                                                                                                                     |               |
| 20 |                               |     |                                                                                                                                                                                                                                                                                     |               |
| 21 | Dissemination policy          | 31a | Plans for investigators and sponsor to communicate trial results to participants, healthcare professionals, the public, and other relevant groups (eg, via publication, reporting in results databases, or other data sharing arrangements), including any publication restrictions | _____25_____  |
| 22 |                               |     |                                                                                                                                                                                                                                                                                     |               |
| 23 |                               |     |                                                                                                                                                                                                                                                                                     |               |
| 24 |                               |     |                                                                                                                                                                                                                                                                                     |               |
| 25 |                               |     |                                                                                                                                                                                                                                                                                     |               |
| 26 |                               | 31b | Authorship eligibility guidelines and any intended use of professional writers                                                                                                                                                                                                      | _____24_____  |
| 27 |                               |     |                                                                                                                                                                                                                                                                                     |               |
| 28 |                               | 31c | Plans, if any, for granting public access to the full protocol, participant-level dataset, and statistical code                                                                                                                                                                     | _____n/a_____ |
| 29 |                               |     |                                                                                                                                                                                                                                                                                     |               |
| 30 | <b>Appendices</b>             |     |                                                                                                                                                                                                                                                                                     |               |
| 31 |                               |     |                                                                                                                                                                                                                                                                                     |               |
| 32 | Informed consent materials    | 32  | Model consent form and other related documentation given to participants and authorised surrogates                                                                                                                                                                                  | _____n/a_____ |
| 33 |                               |     |                                                                                                                                                                                                                                                                                     |               |
| 34 |                               |     |                                                                                                                                                                                                                                                                                     |               |
| 35 | Biological specimens          | 33  | Plans for collection, laboratory evaluation, and storage of biological specimens for genetic or molecular analysis in the current trial and for future use in ancillary studies, if applicable                                                                                      | _____n/a_____ |
| 36 |                               |     |                                                                                                                                                                                                                                                                                     |               |
| 37 |                               |     |                                                                                                                                                                                                                                                                                     |               |

38 \*It is strongly recommended that this checklist be read in conjunction with the SPIRIT 2013 Explanation & Elaboration for important clarification on the items.  
 39 Amendments to the protocol should be tracked and dated. The SPIRIT checklist is copyrighted by the SPIRIT Group under the Creative Commons  
 40 "[Attribution-NonCommercial-NoDerivs 3.0 Unported](https://creativecommons.org/licenses/by-nc-nd/3.0/)" license.  
 41
