# Supplementary material for: The SIMS trial: adjustable anchored single-incision mini-slings versus standard tension-free midurethral slings in the surgical management of female stress urinary incontinence. A study protocol for a pragmatic, multicentre, non-inferiority randomised controlled trial
Source: PubMed Central journal article supplement — BMJ Open. 2017 Aug 11;7(8):e015111. doi: 10.1136/bmjopen-2016-015111 (PMC5724064; doi:10.1136/bmjopen-2016-015111), 2017-08-11
Supplement: bmjopen-2016-015111supp002.pdf [file bmjopen-2016-015111supp002.pdf]

# Pathway for Postoperative Voiding Assessment & Management of Voiding Dysfunction for Women Following Surgery for Mid-urethral slings

**This applies to patients who were not catheterised postoperatively, or after removal of the urethral catheter (and after stopping IV fluids if applicable).**

1. Encourage average fluid intake: 150-200mls/ hour (1 glass/hour).
2. Patients should empty their bladder/ 3-4 hours and encouraged to try to hold in-between if possible.
3. 1st void should be expected within 4 hours (may need prompting by nursing staff); otherwise a bladder-scan assessment is required to rule out retention.
4. Measure Voided Volume (VV) and Post-voiding Residual Urine (PVR) using Bladder-scan following each void. **"Satisfactory Voiding"** is achieved when **PVR  $\leq$  1/3 of bladder capacity and  $\leq$  150mls.**
5. Patients can be instructed in "Double Voiding" (void twice with 5 minutes interval & scanned for PVR after the second void; VV is then measured as total of the 2 voids).

| Examples of Satisfactory Voiding |            |
|----------------------------------|------------|
| VV (mls)                         | PVR (mls)  |
| 200                              | $\leq$ 120 |
| $\geq$ 250                       | $\leq$ 150 |

**Once satisfactory Voiding is achieved (one assessment); patient can be discharged**

N.B. In some units, surgeons leave 200 mls in bladder after cystoscopy so that patients feel the desire to pass urine early.

## Management of Patients with Unsatisfactory Voiding Assessment:

Patients with PVR > 150mls after 1st assessment as above; should be encouraged to try to void again within 20min or so and the VV measured

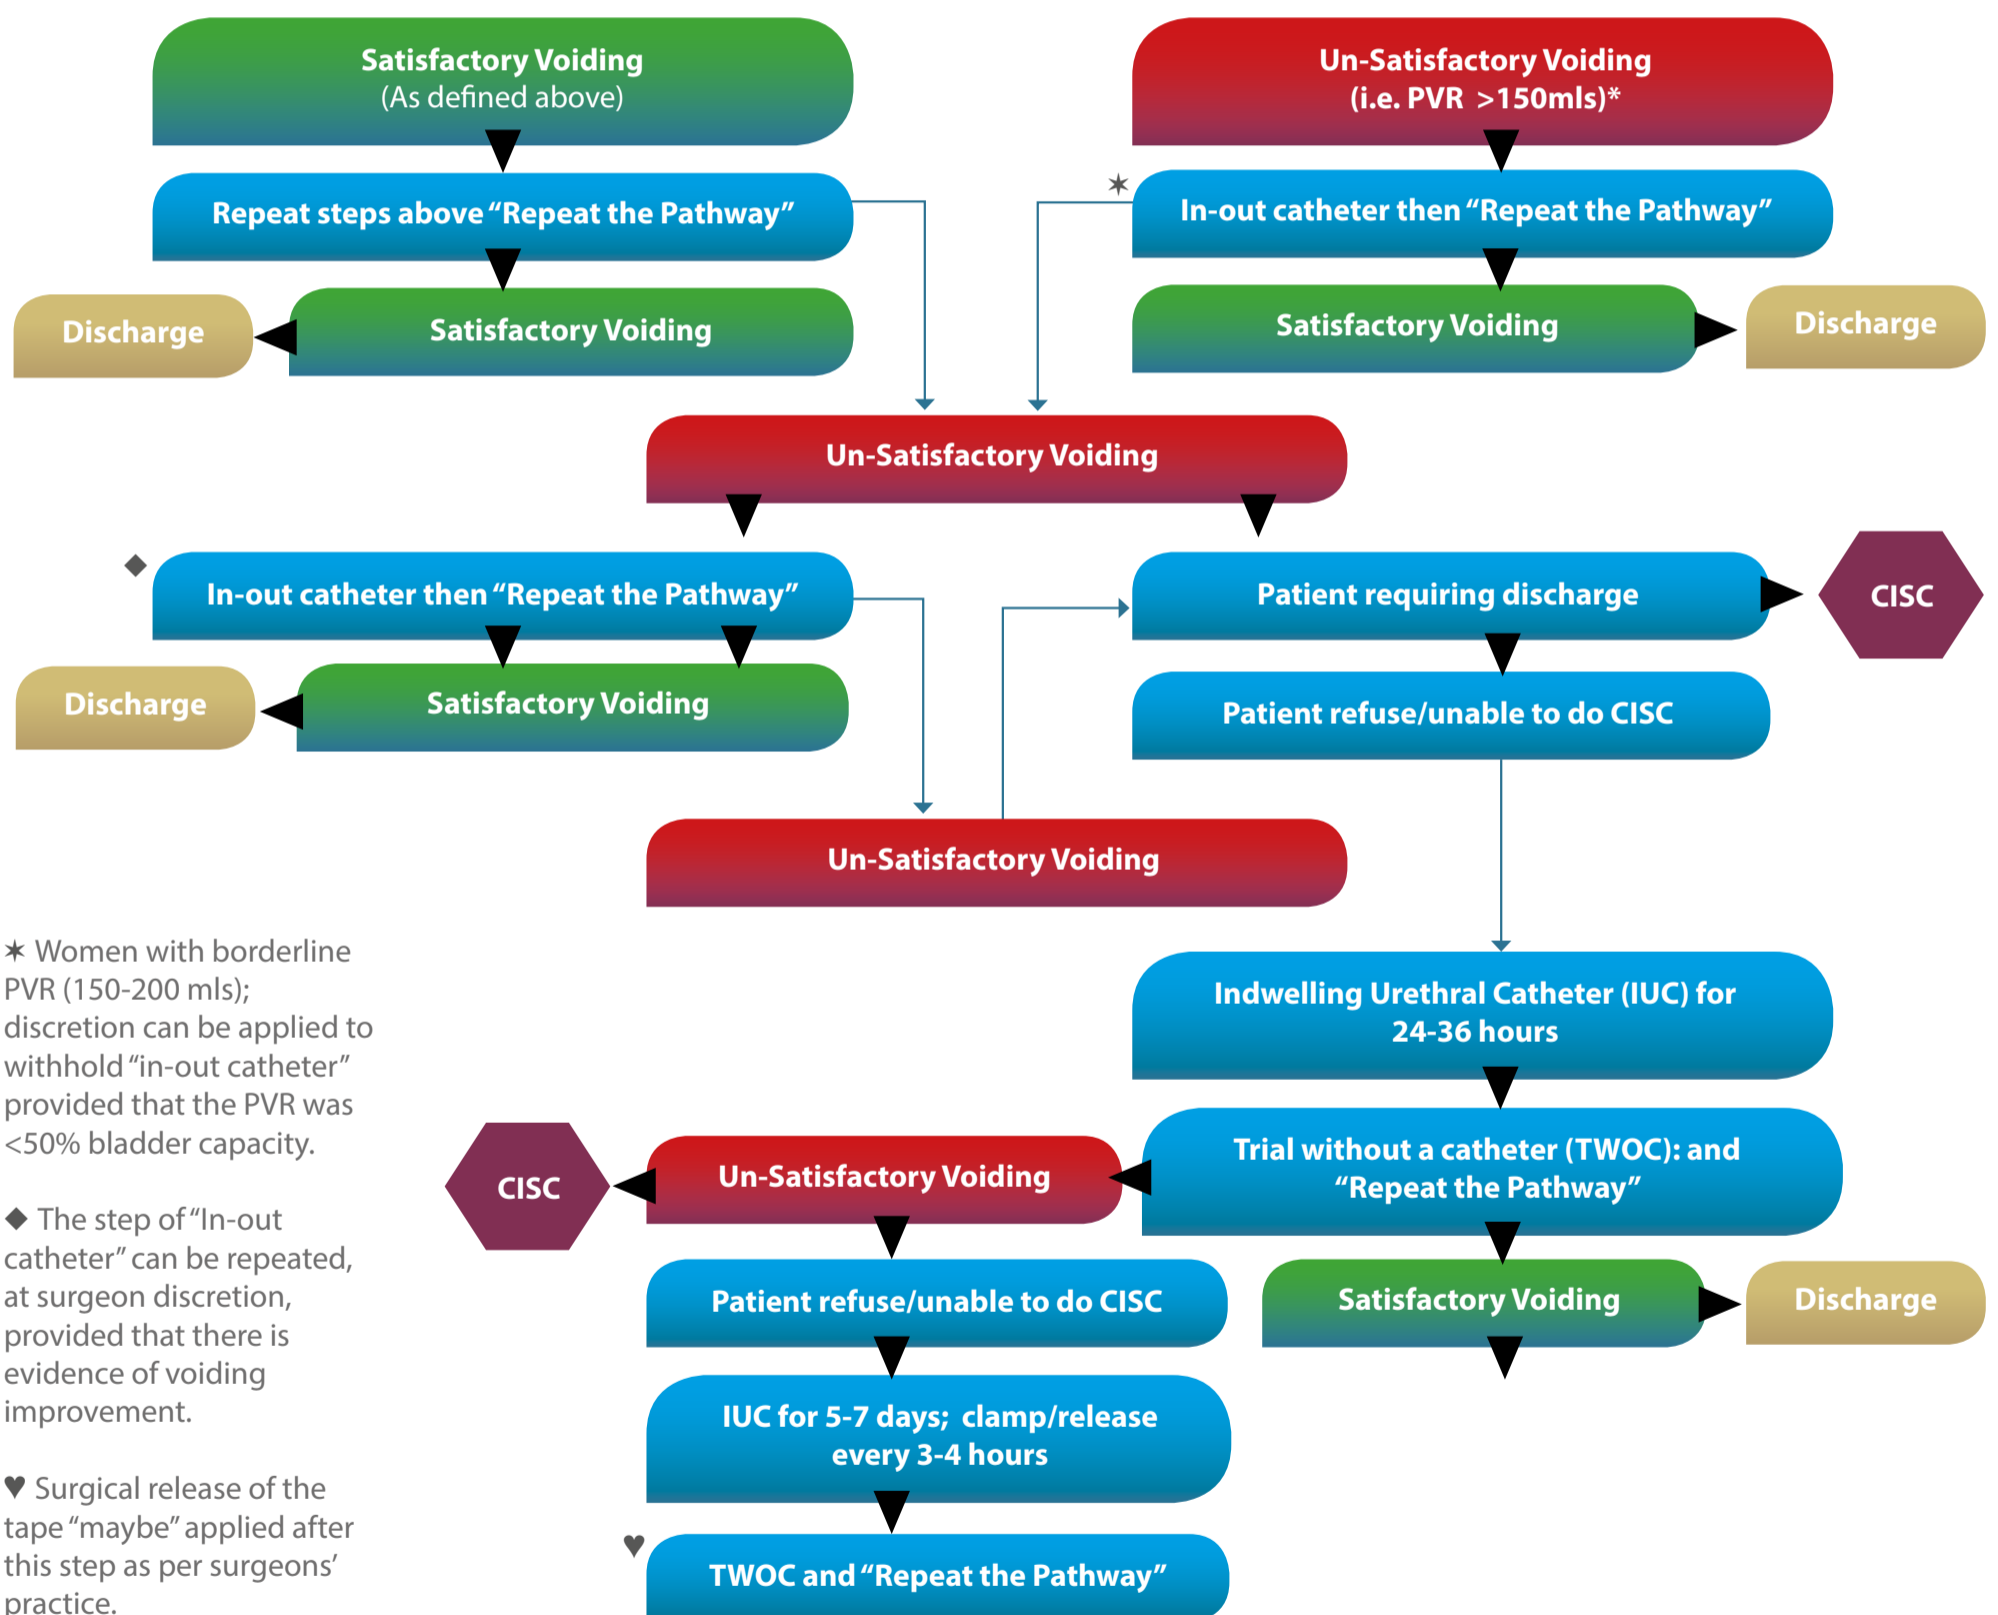

\* Women with borderline PVR (150-200 mls); discretion can be applied to withhold "in-out catheter" provided that the PVR was <50% bladder capacity.

◆ The step of "In-out catheter" can be repeated, at surgeon discretion, provided that there is evidence of voiding improvement.

♥ Surgical release of the tape "maybe" applied after this step as per surgeons' practice.

## Management of CISC

Frequency of CISC/ day can be indicated by the level of the PVR (or per surgeon practice as no robust clinical evidence to base a recommendation) – see example below:

| PVR (> mls) | CISC/ day |
|-------------|-----------|
| 50 - 300    | 2         |
| 300 - 400   | 3         |
| >400        | 4         |

Patients would be instructed to keep records of VV & PVR (for 2 days/ week) and follow-up is arranged (can be phone/ email/ in-person) in 1-2 weeks to check the volumes and the need to continue on CISC. If continuing, please check if any difficulties performing; whether the frequency needs to be altered and date of next review.

No need for "routine prescribing" of prophylactic antibiotics however local estrogen treatment can be considered in postmenopausal women.
