# Supplementary material for: The SIMS trial: adjustable anchored single-incision mini-slings versus standard tension-free midurethral slings in the surgical management of female stress urinary incontinence. A study protocol for a pragmatic, multicentre, non-inferiority randomised controlled trial
Source: PubMed Central journal article supplement — BMJ Open. 2017 Aug 11;7(8):e015111. doi: 10.1136/bmjopen-2016-015111 (PMC5724064; doi:10.1136/bmjopen-2016-015111), 2017-08-11
Supplement: bmjopen-2016-015111supp003.pdf [file bmjopen-2016-015111supp003.pdf]

### **Appendix 3: Objective Assessment of Urinary Incontinence within the SIMS Trial - Protocol**

- Participants will receive: ≥4 pre-weighed pads in two transparent self-sealing plastic bags (for the 24 hour pad test), 2 tissue continence sheets (for the home continence stress tests - HCST), instructions on how to perform the tests and a test evaluation questionnaire.
  
- Each participant will be asked to:-
  - Perform a standardised HCST.
  - Perform the 24-hours pad test (as described by the international continence society) using the provided pre-weighed pads.
  - Repeat the HCST at the end of the 24 hour pad test.
  - Report all their observations on the provided test questionnaire.
  
- At the end of the tests, women will be asked to complete an open question regarding their experience of the tests. Women's satisfaction/convenience with each test will also be assessed using 10-point Likert scales.
  
- **Pre-operatively**, participants will be asked to perform this test 24 hours prior to their operation and return any used pads and the test questionnaire to the local RN/team on the day of their surgery. The returned pads will be weighed using a gram sensitive scale and the pad gain, if any, will be calculated and recorded.
  
- **At 1, 2 and 3 years postoperative**, participants will return the completed test questionnaire and any used pads in the self-addressed pre-paid envelope provided within 24 hours of completion.
  
- The returned pads will be weighed by the researcher using a gram sensitive scale and the pad gain, if any, will be calculated and recorded.
